# Supplementary material for: The Sight Loss and Vision Priority Setting Partnership (SLV-PSP): overview and results of the research prioritisation survey process
Source: PubMed Central journal article supplement — BMJ Open. 2014 Jul 22;4(7):e004905. doi: 10.1136/bmjopen-2014-004905 (PMC4120376; doi:10.1136/bmjopen-2014-004905), 2014-07-22
Supplement: bmjopen-2014-004905.draft_revisions.pdf [file bmjopen-2014-004905.draft_revisions.pdf]

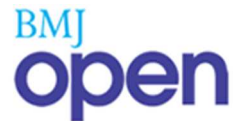

**The Sight Loss and Vision Priority Setting Partnership (SLV-PSP): Overview and results of the research prioritisation process.**

|                                 |                                                                                                                                                                                                                                                                                                                                                                                                                            |
|---------------------------------|----------------------------------------------------------------------------------------------------------------------------------------------------------------------------------------------------------------------------------------------------------------------------------------------------------------------------------------------------------------------------------------------------------------------------|
| Journal:                        | <i>BMJ Open</i>                                                                                                                                                                                                                                                                                                                                                                                                            |
| Manuscript ID:                  | bmjopen-2014-004905                                                                                                                                                                                                                                                                                                                                                                                                        |
| Article Type:                   | Research                                                                                                                                                                                                                                                                                                                                                                                                                   |
| Date Submitted by the Author:   | 21-Jan-2014                                                                                                                                                                                                                                                                                                                                                                                                                |
| Complete List of Authors:       | Rowe, Fiona; University of Liverpool, Health Services Research<br>Wormald, Richard<br>Cable, Richard<br>Acton, Michele<br>Bonstein, Karen<br>Bowen, Michael<br>Bronze, Carol<br>Bunce, Catey<br>Conroy, Dolores<br>Cowan, Katherine<br>Evans, Kathy<br>Fenton, Mark<br>Giles, Heather<br>Gordon, Iris<br>Halfhide, Louise<br>Harper, Robert<br>Lightstone, Anita<br>Votruba, Marcela<br>Waterman, Heather<br>Zekite, Antra |
| <b>Primary Subject Heading</b>: | Ophthalmology                                                                                                                                                                                                                                                                                                                                                                                                              |
| Secondary Subject Heading:      | Ophthalmology, Qualitative research                                                                                                                                                                                                                                                                                                                                                                                        |
| Keywords:                       | Sight loss, Vision, Research, Priorities, Partnership, James Lind Alliance                                                                                                                                                                                                                                                                                                                                                 |
|                                 |                                                                                                                                                                                                                                                                                                                                                                                                                            |

SCHOLARONE™  
Manuscripts

**The Sight Loss and Vision Priority Setting Partnership (SLV-PSP): Overview and results of the research prioritisation process.**

Fiona Rowe<sup>1</sup>, Richard Wormald<sup>2,3</sup>, Richard Cable<sup>4</sup>, Michele Acton<sup>4</sup>, Karen Bonstein<sup>5</sup>, Michael Bowen<sup>6</sup>, Carol Bronze<sup>7</sup>, Catey Bunce<sup>2,3,5</sup>, Dolores Conroy<sup>4</sup>, Katherine Cowan<sup>8</sup>, Kathy Evans<sup>9</sup>, Mark Fenton<sup>10</sup>, Heather Giles<sup>7</sup>, Iris Gordon<sup>3</sup>, Louise Halfhide<sup>5</sup>, Robert Harper<sup>11</sup>, Anita Lightstone<sup>12</sup>, Marcela Votruba<sup>13</sup>, Heather Waterman<sup>14</sup>, Antra Zekite<sup>2</sup>

1. British and Irish Orthoptic Society
2. Moorfields Eye Hospital NHS Foundation Trust
3. The Cochrane Eyes and Vision Group, London School of Hygiene and Tropical Medicine
4. Fight for Sight
5. NIHR Moorfields Biomedical Research Centre for Ophthalmology
6. College of Optometrists
7. Patient representative
8. The James Lind Alliance (JLA) –National Institute for Health Research
9. Royal College of Ophthalmologists
10. UK DUETs (NICE Evidence – UK Database of Uncertainties about the Effects of Treatments)
11. Manchester Royal Eye Hospital
12. UK Vision Strategy / VISION 2020 UK
13. Cardiff University
14. University of Manchester

**Corresponding author:**

Dr Fiona Rowe

Department of Health Services Research,

Whelan Building (1.10),

University of Liverpool,

1  
2  
3 Brownlow Hill,  
4

5 Liverpool L69 3GB  
6

7  
8 T: 0151 7944956  
9

10 E: rowef@liverpool.ac.uk  
11

12  
13  
14  
15 **Word count:** 3514  
16

17  
18 **Number of figures:** 2  
19

20  
21 **Number of tables:** 2  
22

23 **Short title:** Sight Loss and Vision Priority Setting Partnership  
24  
25  
26  
27  
28  
29  
30  
31  
32  
33  
34  
35  
36  
37  
38  
39  
40  
41  
42  
43  
44  
45  
46  
47  
48  
49  
50  
51  
52  
53  
54  
55  
56  
57  
58  
59  
60

## Abstract

Objectives: The Sight Loss and Vision Priority Setting Partnership aimed to identify research priorities relating to sight loss and vision through consultation with patients, carers and clinicians. These priorities can be used to inform funding bodies decisions and enhance the case for additional research funding.

Design: Prospective survey with support from the James Lind Alliance.

Setting: UK wide NHS and non-NHS.

Participants: Patients, carers and eye health professionals. Academic researchers were excluded. The survey was disseminated by patient groups, professional bodies, at conferences and through the media, and was available for completion online, by phone, by post and by alternative formats (Braille and audio).

Outcome measure: People were asked to submit the questions about prevention, diagnosis and treatment of sight loss and eye conditions that they most wanted to see answered by research. Returned survey questions were reviewed by a data analysis group and out of scope/duplicate/answered questions removed. The remaining questions went through an interim prioritisation process. The top priorities were established across eye disease categories at final workshops.

Results: 2,220 people responded generating 4,461 submissions. Sixty-five percent of respondents had sight loss and/or an eye condition. Following initial data analysis, 686 submissions remained which were circulated for interim prioritisation (excluding cataract and ocular cancer questions) to 446 patients/carers and 218 professionals. The remaining 346 questions were discussed at final prioritisation workshops to reach agreement of top questions per category.

Conclusions: The exercise engaged a diverse community of stakeholders generating a wide range of conditions and research questions. Top priority questions were established across 12 eye disease categories.

**Keywords:** Sight loss; Vision; Research; Priorities; Partnership; James Lind Alliance

## Article summary

Strengths and limitations of this study:

- Wide ranging and comprehensive coverage
- Substantial response
- The hardest to reach and those with the least opportunity to be heard may indeed have not been heard
- Any such groups now feeling excluded should have an opportunity to redress this.

## Introduction

In the UK it is estimated that almost 2 million people are affected by sight loss and this number is expected to double by 2050<sup>1</sup>. Currently 50% of sight loss in the UK is avoidable but there are also many unavoidable sight loss conditions. Whether it is to address childhood eye conditions or those affecting adults, research is needed to inform us about prevention, to develop new techniques for early diagnosis and to develop new and more effective treatments for many eye conditions.

The Sight Loss and Vision Priority Setting Partnership (SLV-PSP) was developed from earlier work by the Eye Research Group (ERG) of VISION 2020 UK whose mission is the elimination of avoidable sight loss and the amelioration of the effects of sight loss when it cannot be avoided<sup>2</sup>. The UK Vision Strategy sets out ways of addressing avoidable sight loss in the UK. There is much that can be done to improve the nation's eye health, and to eliminate avoidable sight loss. There are however gaps in the evidence base regarding eye health interventions and the best way to deliver services. Research is needed to support the UK Vision Strategy. In key areas research is urgently required to enable the Vision Strategy to be implemented in an evidence-based way that ensures efficient and effective development.

Despite on-going research in the UK and other countries, there are still many questions about the prevention, diagnosis and treatment of sight loss and eye conditions that remain unanswered. Given that resources for research are limited, it

1  
2  
3 is important for research funders to understand how patients, carers and eye health  
4 professionals prioritise these unanswered questions so that future research can be  
5 consolidated and targeted accordingly<sup>3</sup>.  
6  
7

8  
9 The purpose of this project was to undertake a comprehensive, UK-wide, survey of  
10 patients, carers and clinicians to identify research questions and priorities to inform  
11 decisions of funding bodies and enhance the case for additional research funding.  
12  
13

14 The priority setting process has been well established by the James Lind Alliance  
15 (JLA) (<http://www.lindalliance.org/>) which has supported partnerships on a range of  
16 topics since 2004. This partnership initiated by Fight for Sight, the UK's leading eye  
17 research charity was established with support, financial and in kind, from the College  
18 of Optometrists, the Royal College of Ophthalmologists, the NIHR Biomedical  
19 Research Centre for Ophthalmology, the RNIB, UK Vision Strategy and the  
20 Cochrane Eyes and Vision Group. A representative from the JLA convened meetings  
21 of the steering committee and provided independent chairmanship for this and the  
22 priority setting workshops. Their extensive experience in this process ensured no  
23 single voice exerted undue influence over the prioritisation process and that the  
24 views of patients, their carers and clinicians were paramount. The views of  
25 researchers with no clinical involvement with patients and views of commercial  
26 organisations were not included.  
27  
28  
29  
30  
31  
32  
33  
34  
35  
36  
37  
38  
39

## 40 **Methods and materials**

41  
42 The detailed methods for this prioritisation process have been described in detail  
43 elsewhere<sup>4</sup>. In brief, the process comprised five stages (figure 1).  
44  
45

### 46 ***Establishing the SLV-PSP***

47  
48 A steering committee and data assessment group comprising the authors of this  
49 article oversaw the process. Each member was responsible for contributing to and  
50 managing a part of the process and was selected for their expertise and association  
51 with eye research. The steering committee also included patient representatives  
52 and eye health professionals. In April 2012 an initial stakeholder meeting was held to  
53 engage the groups and organisations with member bases and community influence.  
54  
55  
56  
57  
58  
59  
60

1  
2  
3 This was to ensure that the initial survey would be disseminated and completed by  
4 as many patients, relatives, carers and eye health professionals as possible in the  
5 UK.  
6  
7

### 8 ***Main survey***

9  
10 The SLV-PSP survey was launched on 1 May 2012 and was open until 31 July 2012.  
11 The aim of the survey was to identify patients', carers' and eye health professionals'  
12 unanswered questions about sight loss and eye conditions. The survey's primary  
13 question was "What question(s) about the prevention, diagnosis and treatment of  
14 sight loss and eye conditions would you like to see answered by research?"  
15  
16  
17  
18  
19

### 20 ***Data analysis***

21  
22 Following closure of the survey, all submissions were examined. Out-of-scope  
23 submissions were removed including those not related to the topic and uncertainties  
24 better suited to social research. In-scope uncertainties were allocated into disease-  
25 specific groups and re-worded in PICO format (Population, Intervention,  
26 Comparison, Outcome). Searches were then undertaken to ascertain whether or not  
27 each uncertainty could be answered by an up-to-date systematic review. All  
28 unanswered uncertainties were then allocated to one of 12 eye disease categories,  
29 with duplicates removed and similar questions combined. The 12 categories were  
30 formed following discussions by the steering group on the most logical and  
31 pragmatic way to organise the data within the time and resources available.  
32  
33  
34  
35  
36  
37  
38  
39

### 40 ***Interim prioritisation***

41  
42 In order to start reducing the number of uncertainties, an interim prioritisation  
43 exercise was conducted over email and by post. Patients, carers and eye health  
44 professionals were invited to examine the long lists and then choose and rank 10 of  
45 the uncertainties.  
46  
47  
48  
49

### 50 ***Final prioritisation***

51  
52 The remaining uncertainties were ranked by patients, carers, relatives, organisation  
53 representatives and eye health professionals in one-day workshops facilitated by the  
54 JLA, using Nominal Group Technique – a mix of discussion and ranking. For each  
55 category, the top 10/11 questions were agreed.  
56  
57  
58  
59  
60

## Results

### *Main survey*

In response to the survey, 2220 people generated 4461 submissions. Of these respondents, 17% identified themselves as healthcare professionals including primarily ophthalmologists, optometrists, orthoptists, ophthalmic nurses, opticians and people working in social care and rehabilitation (figure 2). Over 60% were people with sight loss or an eye condition. The average age of survey participants was 65.7 years old (range:16 months (proxy completion of survey by adult carer)to 105 years). Just under two thirds (62%) of respondents were female. The geographical split was: England 89%; Scotland 6%; Wales 4%; Northern Ireland 1%.

### *Data analysis*

Following data analysis to remove duplicate/answered/out of scope uncertainties, 686 uncertainties remained. These were divided into twelve eye disease categories. Table 1 shows each category with the initial number of submissions received after the survey responses were submitted, the number of uncertainties sent to interim prioritisation, the number of participants at interim prioritisation and the number of uncertainties considered at the final prioritisation workshops.

### *Interim prioritisation*

Respondents from the initial survey, organisations and eye healthcare professionals with expertise in the eye diseases in ten categories were contacted to provide interim priority rankings. The smaller number of questions asked in the categories relating to cataract and ocular cancer meant that an interim prioritisation exercise was not required for either category. A large response was received for the interim exercise, with input from 446 patients, carers and relatives plus 218 eye health professionals. Uncertainties accumulated scores based on rank and frequency, resulting in short lists of around 30 uncertainties per category which were taken to final workshops.

### *Final prioritisation*



1  
2  
3 In April and May 2013, 12 final prioritisation workshops were held: one for each eye  
4 disease category. Balanced numbers of patients/carers/relatives and eye health  
5 professionals participated. In total, 155 participants attended across all 12  
6 workshops: 78 patients and 77 clinicians (table 2). The topics debated at each  
7 workshop comprised between 19-31 questions per category. Overall 153 questions  
8 about sight loss and vision were considered resulting in lists of 10/11 priorities for  
9 each of the 12 categories:  
10  
11  
12  
13

### 14 ***Age-related macular degeneration***

- 15 1. Can a treatment to stop dry AMD progressing and/or developing into the wet  
16 form be devised?
- 17 2. What is the cause of AMD?
- 18 3. How can AMD be prevented?
- 19 4. Are there ways of restoring sight loss for people with AMD?
- 20 5. Can the development of AMD be predicted?
- 21 6. What is the most effective way to detect and monitor the progression of early  
22 AMD?
- 23 7. What factors influence the progression of AMD?
- 24 8. Can a non-invasive therapy be developed for wet AMD?
- 25 9. Can dietary factors, nutritional supplements, complementary therapies or  
26 lifestyle changes prevent or slow the progression of AMD?
- 27 10. What are the best enablement strategies for people with AMD?

### 28 ***Cataract***

- 29 1. How can cataracts be prevented from developing?
- 30 2. Can the return of cloudy or blurred vision after cataract surgery known as  
31 posterior capsule opacity (PCO) or secondary cataract be prevented?
- 32 3. How can cataract progression be slowed down?
- 33 4. What alternatives to treat cataracts other than cataract surgery are being  
34 developed?
- 35 5. What is the cause of cataract?
- 36 6. How can cataract surgery outcomes be improved?
- 37 7. How safe and effective is laser assisted cataract surgery?
- 38 8. Should accommodative lenses be developed for cataract surgery?

- 1
- 2
- 3 9. What is the best measure of visual disability due to cataract?
- 4 10. Can retinal detachment be prevented after cataract surgery?
- 5
- 6 11. What are the outcomes for cataract surgery among people with different
- 7 levels of cognitive impairment (whatever the cause but including dementia,
- 8 stroke, neurological conditions, head injuries)?
- 9
- 10

### ***Childhood-onset disorders***

- 11
- 12
- 13
- 14 1. How can cerebral visual impairment be identified, prevented and treated in
- 15 children?
- 16
- 17 2. How can treatment for visual pathway damage associated with pre-term birth
- 18 be developed?
- 19
- 20 3. How do we improve screening and surveillance from the ante-natal period
- 21 through to childhood to ensure early diagnosis of impaired vision and eye
- 22 conditions?
- 23
- 24 4. Can the treatment of amblyopia be improved to produce better short and long
- 25 term outcomes than are possible with current treatments?
- 26
- 27 5. How can cataract be prevented in children?
- 28
- 29 6. What are the causes of coloboma and microphthalmia/anophthalmia and how
- 30 can they be prevented?
- 31
- 32 7. Can vision be corrected in later life for people with amblyopia?
- 33
- 34 8. How can retinoblastoma be identified, prevented and treated in children?
- 35
- 36 9. Can better treatments for glaucoma in children be developed?
- 37
- 38 10. Can a treatment be developed to improve vision for people with albinism?
- 39

### ***Corneal and external diseases***

- 40
- 41
- 42
- 43 1. Can new therapies such as gene or stem cell treatments be developed for
- 44 corneal diseases?
- 45
- 46 2. What is the most effective management for dry eye and can new strategies be
- 47 developed?
- 48
- 49 3. Can treatments to save eye sight from microbial keratitis be improved?
- 50
- 51 4. How can the rejection of corneal transplants be prevented?
- 52
- 53 5. Can the outcomes of corneal transplantation be improved?
- 54
- 55 6. What causes keratoconus to progress and can progression be prevented?
- 56
- 57 7. Can non-surgical therapy be developed for Fuchs' corneal dystrophy?
- 58
- 59
- 60

- 1
  - 2
  - 3
  - 4
  - 5
  - 6
  - 7
  - 8
  - 9
  - 10
  - 11
  - 12
  - 13
  - 14
  - 15
  - 16
  - 17
  - 18
  - 19
  - 20
  - 21
  - 22
  - 23
  - 24
  - 25
  - 26
  - 27
  - 28
  - 29
  - 30
  - 31
  - 32
  - 33
  - 34
  - 35
  - 36
  - 37
  - 38
  - 39
  - 40
  - 41
  - 42
  - 43
  - 44
  - 45
  - 46
  - 47
  - 48
  - 49
  - 50
  - 51
  - 52
  - 53
  - 54
  - 55
  - 56
  - 57
  - 58
  - 59
  - 60
8. Can corneal infections be prevented in high-risk individuals such as contact lens wearers?
  9. What is the cause of keratoconus and can it be prevented?
  10. What is the most effective management of ocular complications associated with Stevens Johnson Syndrome?
  11. Can severe ocular surface disease in children, such as blepharokeratoconjunctivitis and vernal keratoconjunctivitis be managed better?

### ***Glaucoma***

1. What are the most effective treatments for glaucoma and how can treatment be improved?
2. How can loss of vision be restored for people with glaucoma?
3. How can glaucoma be stopped from progressing?
4. What can be done to improve early diagnosis of sight-threatening glaucoma?
5. What causes glaucoma?
6. What is the most effective way of monitoring the progression of glaucoma?
7. How can glaucoma patients with a higher risk to progress rapidly be detected?
8. Why is glaucoma more aggressive in people of certain ethnic groups, such as those of West African origin?
9. How can glaucoma be prevented?
10. Is there a link between treatment adherence and glaucoma progression and how can adherence be improved?

### ***Inherited retinal diseases***

1. Can a treatment to slow down progression or reverse sight loss in inherited retinal diseases be developed?
2. How can sight loss be prevented in an individual with inherited retinal disease?
3. Is a genetic (molecular) diagnosis possible for all inherited retinal diseases?
4. What factors affect the progression of sight loss in inherited retinal diseases?
5. What causes sight loss in inherited retinal diseases?
6. What is the most effective way to support patients with inherited retinal disease?

- 1
- 2
- 3 7. Can the diagnosis of inherited retinal diseases be refined so that individuals
- 4 can be given a clearer idea about their specific condition and how it is likely to
- 5 progress?
- 6
- 7
- 8 8. What is the relationship between sight loss and mental health for people with
- 9 inherited retinal diseases?
- 10
- 11 9. Would having a treatment for an inherited retinal disease preclude a patient
- 12 from having another treatment?
- 13
- 14 10. With regard to inherited retinal diseases what is the role of pre-natal and pre-
- 15 implantation diagnosis in helping parents make informed choices?
- 16
- 17

### ***Neuro-ophthalmology***

- 18
- 19
- 20 1. What is the underlying cause of optic nerve damage in optic neuropathies,
- 21 such as anterior ischaemic optic neuropathy, Leber's hereditary optic
- 22 neuropathy, optic neuritis and other optic neuropathies?
- 23
- 24 2. What are the most effective treatments and rehabilitation for optic
- 25 neuropathies, e.g. Leber's hereditary optic neuropathy and anterior ischaemic
- 26 optic neuropathy?
- 27
- 28 3. Can vision loss due to optic nerve diseases such as giant cell arteritis, Leber's
- 29 hereditary optic neuropathy, optic neuritis and optic atrophy, be restored, for
- 30 example through gene therapy and stem cell treatment?
- 31
- 32 4. What rehabilitation or treatment methods are most effective for vision loss
- 33 following brain damage due to stroke, brain injury, cerebral vision impairment,
- 34 tumours and dementias?
- 35
- 36 5. What is the most effective way to assess vision in patients with neurological
- 37 visual impairment i.e. stroke, dementia and cerebral/cortical visual
- 38 impairment?
- 39
- 40 6. Can the early stages of optic neuropathy be detected?
- 41
- 42 7. How can optic neuropathies be prevented, for example anterior ischaemic
- 43 optic neuropathy, Leber's hereditary optic neuropathy, optic neuritis and other
- 44 optic neuropathies?
- 45
- 46 8. Can treatments be developed for visual field and ocular motility manifestations
- 47 following stroke?
- 48
- 49 9. How can electronic devices improve or restore vision for people with optic
- 50 neuropathies?
- 51
- 52
- 53
- 54
- 55
- 56
- 57
- 58
- 59
- 60

10. Can an alternative or new treatment be developed that will treat the sight loss caused by giant cell arteritis?

### ***Ocular cancer***

1. What can be done to help ocular cancer sufferers?
2. Can gene-based targeted therapies for ocular cancers be developed?
3. How can immunotherapy be used to fight metastatic ocular melanoma?
4. What are the most effective detection and screening methods for follow up to detect metastasis of ocular melanoma?
5. How can follow-up for ocular complications be managed in patients with ocular melanoma?
6. What is the best management of metastatic choroidal melanoma?
7. What activates choroidal melanoma metastasis in the liver after the primary melanoma has been treated?
8. Can adjuvant therapies be developed to treat ocular melanoma?
9. What are the causes of ocular cancer and how can they be prevented?
10. What is the most effective treatment for primary ocular melanoma?

### ***Ocular inflammatory diseases***

1. What are the most effective treatments for ocular and orbital inflammatory diseases?
2. What causes thyroid eye disease?
3. Can the severity of ocular and orbital inflammatory disease in an individual be predicted?
4. Is it possible to prevent further occurrences of retinal damage caused by toxoplasmosis?
5. What causes birdshot retinopathy?
6. Why does disease burn out in patients with ocular and orbital inflammatory diseases?
7. Can early detection methods be developed for ocular and orbital inflammatory diseases?
8. What medications best prevent the development of eye disease in Behcets?
9. What causes scleritis?
10. Can diet or lifestyle changes prevent uveitis from developing?

### ***Refractive error and ocular motility***

- 1
  - 2
  - 3
  - 4
  - 5
  - 6
  - 7
  - 8
  - 9
  - 10
  - 11
  - 12
  - 13
  - 14
  - 15
  - 16
  - 17
  - 18
  - 19
  - 20
  - 21
  - 22
  - 23
  - 24
  - 25
  - 26
  - 27
  - 28
  - 29
  - 30
  - 31
  - 32
  - 33
  - 34
  - 35
  - 36
  - 37
  - 38
  - 39
  - 40
  - 41
  - 42
  - 43
  - 44
  - 45
  - 46
  - 47
  - 48
  - 49
  - 50
  - 51
  - 52
  - 53
  - 54
  - 55
  - 56
  - 57
  - 58
  - 59
  - 60
1. What factors influence the development of refractive error (myopia, astigmatism, presbyopia and long-sightedness)?
  2. What is the cause of both congenital and acquired nystagmus?
  3. How can the development of binocular vision in young children with squint and amblyopia be promoted, and would the same approach work in older individuals without inducing intractable diplopia?
  4. Would correction of refractive error have a positive impact on early life learning and development?
  5. Does early diagnosis of refractive error improve long-term prognosis and promote faster, more effective treatment?
  6. What is the effect of congenital nystagmus on visual and emotional development?
  7. What is the most effective treatment for exotropia and when should it be delivered?
  8. How can the functional effects of surgical treatment for squint best be assessed?
  9. Could the accurate testing of refractive error be made less dependent on a subjective response i.e. the person's own response?
  10. How can myopia be prevented?

### ***Retinal vascular diseases***

1. What are the best methods to prevent retinopathy of prematurity?
2. How can sight loss from diabetic retinal changes be prevented and reduced?
3. What are the predictive factors for the progression to sight threatening diabetic eye disease?
4. Is there a way to improve screening of premature babies for retinopathy of prematurity?
5. Can an effective long lasting treatment for diabetic macular oedema, both ischaemic and non-ischaemic, be developed?
6. Can a retinal vein occlusion be predicted and prevented?
7. Can new non-invasive treatments be developed to slow down the progression of diabetic retinopathy?
8. What are the barriers that prevent diabetic patients having regular eye checks?

9. What rehabilitation programmes are best for the management of distorted vision from retinal diseases?
10. What is the efficacy and safety of anti-VEGF agents in the treatment of retinopathy of prematurity?

### ***Vitreoretinal and ocular trauma***

1. How can surgical techniques be improved to save sight for eyes damaged by injury?
2. How can the risk of losing sight for people with retinal detachment be reduced?
3. How can better interventions be developed that are effective in treating vitreous opacities/eye floaters?
4. What causes retinal detachment and can it be prevented?
5. Can more effective diagnostic tools be developed for assessing the vitreous and eye floaters?
6. Can a functioning prosthetic eye be developed to replace an eye damaged by injury?
7. How can epiretinal membrane/fibrosis be prevented or treated?
8. Can stem cells be used to regrow an eye or part of an eye?
9. What causes posterior vitreous detachment/vitreous syneresis?
10. Are there methods to prevent and improve the treatment of macular holes?

### **Discussion**

About 50% of sight loss in the UK is currently avoidable<sup>1</sup>. Recognising this and the UK's pre-eminent position in eye research, the Vision 2020UK ERG considered that any UK Research Agenda must look at addressing unavoidable sight loss for it to be credible. The challenge was to produce a coherently constructed and constituted prioritised research agenda whose methods were clear and for which there had been inclusive and widespread consultation, where everyone with an interest had been offered the opportunity to contribute and be heard.

The SLV-PSP is unique because it sought the combined views of patients, carers and eye health professionals to identify uncertainties about the prevention, diagnosis and treatment of sight loss and eye conditions and prioritise them for research to

1  
2  
3 address<sup>5</sup>. It is rare that those with direct experience of conditions are able to  
4 influence the research agenda<sup>3,5,6</sup>. However, this SLV-PSP provided an extensive  
5 set of unanswered questions prioritised by patients, carers and eye health  
6 professionals across twelve categories of eye conditions. These questions  
7 addressed a broad range of eye conditions and considered issues of aetiology,  
8 prevention, screening, assessment and management. These may now be used to  
9 encourage researchers to investigate what is most important to these groups. Similar  
10 to other PSP processes, it is envisaged that research funders will be able to use the  
11 list to inform commissioned calls for research and identify which research  
12 applications to response mode funding opportunities can answer questions that  
13 these groups have agreed are a priority.  
14  
15

16  
17  
18  
19  
20  
21  
22 The SLV-PSP will also help to increase awareness of why research into sight loss  
23 and vision is necessary and important. It will be used to campaign for major funders  
24 to invest in sight loss and eye conditions, all of which are placing increased  
25 emphasis on researchers demonstrating how they have consulted and involved the  
26 public and patients in the process of developing their research.  
27  
28  
29

30  
31 These remain significant goals. For a sector with around 700 organisations to arrive  
32 at any kind of consensus for research priority areas, a process that was genuinely  
33 consultative, open and engaging to the individuals whose interests these  
34 organisations represent as well as at an organisational level was recognised as  
35 being critical. For a prioritisation exercise to be useful to the sector it needed to  
36 make sense to funders and statutory bodies with responsibilities and interests in  
37 these areas as well as to researchers. It was recognised that a prioritisation of  
38 research areas produced by a small group within the sector would not be credible  
39 and would never engage the support required for it to achieve the goals listed above.  
40  
41  
42  
43  
44  
45  
46  
47  
48

## 49 **Conclusions**

50  
51  
52 Following a systematic process of national consultation and widespread survey of  
53 patients, carers and clinicians, 2220 individuals generated 4461 questions. Through  
54 a process of data analysis, interim prioritisation and final workshops, a top ten or  
55 eleven research questions have been identified for twelve categories of eye  
56  
57  
58  
59  
60



1  
2  
3 conditions. This is the first time, to our knowledge, that an exercise like this has been  
4 carried out anywhere in the world for sight loss and vision. Not only is this the most  
5 wide ranging and ambitious James Lind Alliance priority setting partnership, it also  
6 engaged a diversity of participants and enabled them to reach consensus together.  
7  
8 For the first time, we have a clear idea of what the consumers of eye research – the  
9 patients and the people who care for and treat them – believe research money  
10 should be spent on. It has provided a focus for research in sight loss and vision and  
11 it is intended that these priorities are used to inform funders, researchers, clinicians  
12 and the public.  
13  
14  
15  
16  
17  
18  
19  
20  
21  
22  
23  
24  
25  
26  
27  
28  
29  
30  
31  
32  
33  
34  
35  
36  
37  
38  
39  
40  
41  
42  
43  
44  
45  
46  
47  
48  
49  
50  
51  
52  
53  
54  
55  
56  
57  
58  
59  
60

1  
2  
3 **Funding:** This work was supported through funding and/or in-kind support by  
4 College of Optometrists, Fight for Sight, James Lind Alliance, NIHR Moorfields BRC,  
5 RNIB, Royal College of Ophthalmologists and UK Vision Strategy.  
6  
7

8  
9 **Author contributions:** FR, RW, RC, MA, KB, MB, CBr, CBu, DC, KC, KE, MF, HG,  
10 IG, LH, RH, AL, MV, HW and AZ contributed to the conduct of the survey. FR, RW,  
11 RC, MA, MB, DC and KC were involved in the drafting of the paper. KB, CBr, CBu,  
12 KE, MF, HG, IG, LH, RH, AL, MV, HW and AZ contributed to proofing of the paper.  
13  
14

15  
16 **Competing interests:** The authors declare that they have no competing interests.  
17

18  
19 **Data Sharing Statement:** Data sharing statement: All original data are held by Fight  
20 for Sight and James Lind Alliance.  
21  
22

## References

1. Access Economics (2009) Future Sight Loss UK 1: The economic impact of partial sight and blindness in the UK adult population, RNIB
2. <http://www.vision2020uk.org.uk/>
3. Chalmers, I. and Glasziou, P. (2009) 'Avoidable waste in the production and reporting of research evidence', *The Lancet*, Vol. 374, pp. 86–89.
4. Sight loss and vision priority setting partnership. Setting priorities for eye research. (2013) Final report. [www.sightlosspsp.org.uk](http://www.sightlosspsp.org.uk)
5. Stewart, R. and Oliver, S. (2008) *A systematic map of studies of patients' and clinicians' research priorities*. London: James Lind Alliance.
6. Caron-Flinterman J, et al. (2006) Patients priorities concerning health research: the case of asthma and COPD research in the Netherlands. *Health Expectations*, 8, pp253–263.

1  
2  
3  
4  
5  
6  
7  
8  
9  
10  
11  
12  
13  
14  
15  
16  
17  
18  
19  
20  
21  
22  
23  
24  
25  
26  
27  
28  
29  
30  
31  
32  
33  
34  
35  
36  
37  
38  
39  
40  
41  
42  
43  
44  
45  
46  
47  
48  
49  
50  
51  
52  
53  
54  
55  
56  
57  
58  
59  
60

## Figure 1 Flowchart of SLVPSP process

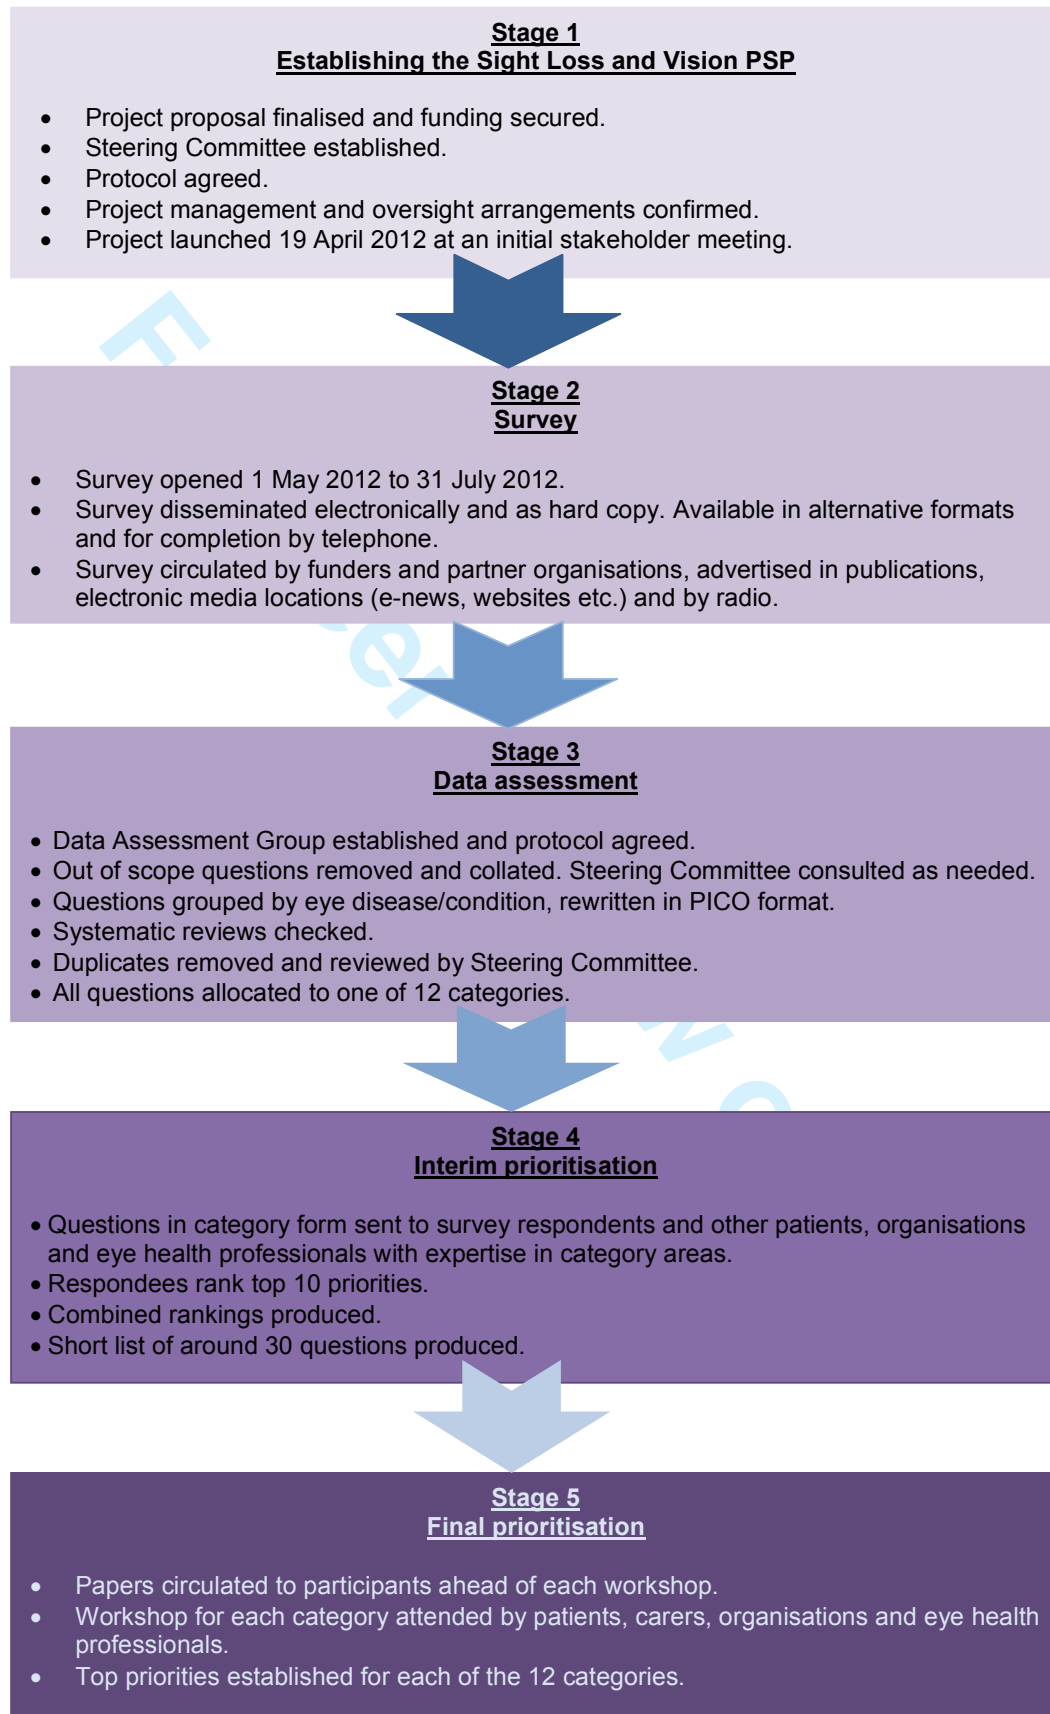

1  
2  
3  
4  
5  
6  
7  
8  
9  
10  
11  
12  
13  
14  
15  
16  
17  
18  
19  
20  
21  
22  
23  
24  
25  
26  
27  
28  
29  
30  
31  
32  
33  
34  
35  
36  
37  
38  
39  
40  
41  
42  
43  
44  
45  
46  
47  
48  
49  
50  
51  
52  
53  
54  
55  
56  
57  
58  
59  
60

For peer review only

1  
2  
3  
4  
5  
6  
7  
8  
9  
10  
11  
12  
13  
14  
15  
16  
17  
18  
19  
20  
21  
22  
23  
24  
25  
26  
27  
28  
29  
30  
31  
32  
33  
34  
35  
36  
37  
38  
39  
40  
41  
42  
43  
44  
45  
46  
47  
48  
49  
50  
51  
52  
53  
54  
55  
56  
57  
58  
59  
60

**Figure 2** Background of respondents

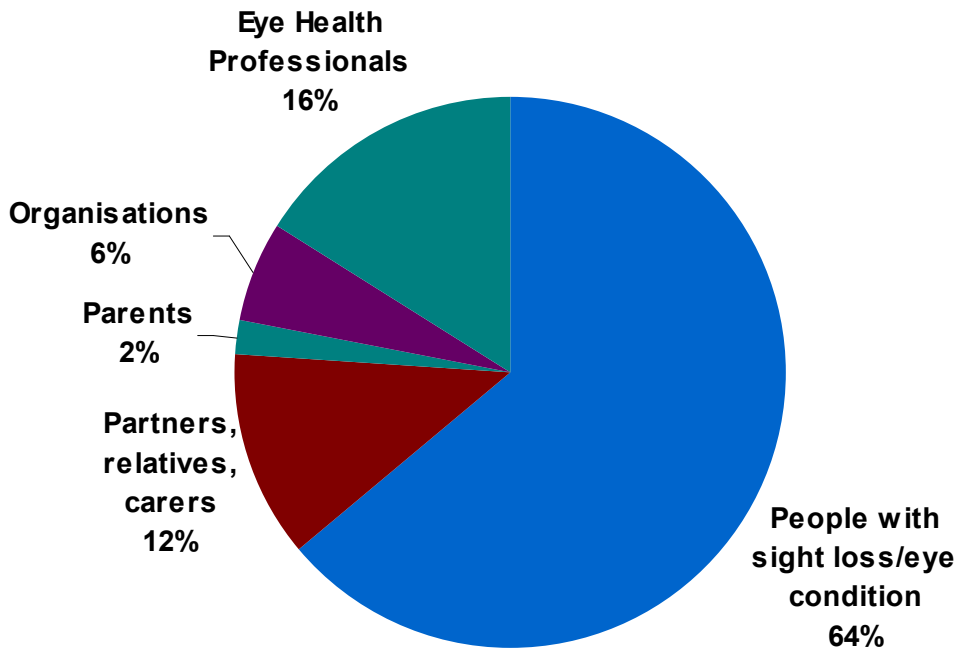

Review only

Table 1 Categories of eye condition

|                                             | Initial number of survey questions | Number of questions at interim prioritisation | Number of participants at interim prioritisation | Number of questions at final prioritisation |
|---------------------------------------------|------------------------------------|-----------------------------------------------|--------------------------------------------------|---------------------------------------------|
| <b>Age-related macular degeneration</b>     | 763                                | 43                                            | 101 PPI<br>25 Professionals                      | 29                                          |
| <b>Cataract</b>                             | 191                                | 27                                            | Not required                                     | 27                                          |
| <b>Childhood-onset disorders</b>            | 125                                | 69                                            | 12 PPI<br>20 Professionals                       | 30                                          |
| <b>Corneal and external diseases</b>        | 292                                | 93                                            | 25 PPI<br>38 Professionals                       | 30                                          |
| <b>Glaucoma</b>                             | 1235                               | 78                                            | 182 PPI<br>25 Professionals                      | 30                                          |
| <b>Inherited retinal diseases</b>           | 280                                | 63                                            | 27 PPI<br>25 Professionals                       | 30                                          |
| <b>Neuro-ophthalmology</b>                  | 125                                | 43                                            | 15 PPI<br>21 Professionals                       | 30                                          |
| <b>Ocular cancer</b>                        | 26                                 | 19                                            | Not required                                     | 19                                          |
| <b>Ocular inflammatory diseases</b>         | 472                                | 66                                            | 27 PPI<br>21 Professionals                       | 30                                          |
| <b>Refractive error and ocular motility</b> | 188                                | 70                                            | 21 PPI<br>23 Professionals                       | 31                                          |
| <b>Retinal vascular diseases</b>            | 205                                | 56                                            | 15 PPI<br>12 Professionals                       | 30                                          |
| <b>Vitreoretinal and ocular trauma</b>      | 265                                | 59                                            | 21 PPI<br>8 Professionals                        | 30                                          |

PPI: Inclusive of patients, carers, relatives, organisation representatives.

Professionals: Inclusive of eye health professions.

**Table 2** Final workshop participants

| Category                             | Total number of workshop participants | Number of patients, relatives, carers, patient groups and organisations | Number of eye health professionals |
|--------------------------------------|---------------------------------------|-------------------------------------------------------------------------|------------------------------------|
| Age-related Macular Degeneration     | 17                                    | 9                                                                       | 8                                  |
| Cataract                             | 11                                    | 5                                                                       | 6                                  |
| Childhood-Onset Disorders            | 16                                    | 7                                                                       | 9                                  |
| Corneal and External Diseases        | 12                                    | 5                                                                       | 7                                  |
| Glaucoma                             | 17                                    | 9                                                                       | 8                                  |
| Inherited Retinal Diseases           | 19                                    | 11                                                                      | 8                                  |
| Neuro-ophthalmology                  | 10                                    | 6                                                                       | 4                                  |
| Ocular Cancer                        | 10                                    | 6                                                                       | 4                                  |
| Ocular Inflammatory Diseases         | 10                                    | 5                                                                       | 5                                  |
| Refractive Error and Ocular Motility | 12                                    | 5                                                                       | 7                                  |
| Retinal Vascular Diseases            | 11                                    | 3                                                                       | 8                                  |
| Vitreoretinal and Ocular Trauma      | 10                                    | 7                                                                       | 3                                  |
| <b>TOTAL</b>                         | <b>155</b>                            | <b>78</b>                                                               | <b>77</b>                          |



# BMJ Open

## The Sight Loss and Vision Priority Setting Partnership (SLV-PSP): Overview and results of the research prioritisation survey process.

|                                 |                                                                                                                                                                                                                                                                                                                                                                                                                                                                                                                                                                                                                                                                                                                                                                                                                                                                                                                                                                                                                                                                                                                                                                                                                                                                                                                                                                                                                                                                                                                                                                                                                                                                               |
|---------------------------------|-------------------------------------------------------------------------------------------------------------------------------------------------------------------------------------------------------------------------------------------------------------------------------------------------------------------------------------------------------------------------------------------------------------------------------------------------------------------------------------------------------------------------------------------------------------------------------------------------------------------------------------------------------------------------------------------------------------------------------------------------------------------------------------------------------------------------------------------------------------------------------------------------------------------------------------------------------------------------------------------------------------------------------------------------------------------------------------------------------------------------------------------------------------------------------------------------------------------------------------------------------------------------------------------------------------------------------------------------------------------------------------------------------------------------------------------------------------------------------------------------------------------------------------------------------------------------------------------------------------------------------------------------------------------------------|
| Journal:                        | <i>BMJ Open</i>                                                                                                                                                                                                                                                                                                                                                                                                                                                                                                                                                                                                                                                                                                                                                                                                                                                                                                                                                                                                                                                                                                                                                                                                                                                                                                                                                                                                                                                                                                                                                                                                                                                               |
| Manuscript ID:                  | bmjopen-2014-004905.R1                                                                                                                                                                                                                                                                                                                                                                                                                                                                                                                                                                                                                                                                                                                                                                                                                                                                                                                                                                                                                                                                                                                                                                                                                                                                                                                                                                                                                                                                                                                                                                                                                                                        |
| Article Type:                   | Research                                                                                                                                                                                                                                                                                                                                                                                                                                                                                                                                                                                                                                                                                                                                                                                                                                                                                                                                                                                                                                                                                                                                                                                                                                                                                                                                                                                                                                                                                                                                                                                                                                                                      |
| Date Submitted by the Author:   | 27-May-2014                                                                                                                                                                                                                                                                                                                                                                                                                                                                                                                                                                                                                                                                                                                                                                                                                                                                                                                                                                                                                                                                                                                                                                                                                                                                                                                                                                                                                                                                                                                                                                                                                                                                   |
| Complete List of Authors:       | Rowe, Fiona; University of Liverpool, Health Services Research<br>Wormald, Richard; The Cochrane Eyes and Vision Group, London School of Hygiene and Tropical Medicine, Eyes and Vision; Moorfields Eye Hospital NHS Foundation Trust, Ophthalmology<br>Cable, Richard; Fight for Sight,<br>Acton, Michele; Fight for Sight,<br>Bonstein, Karen; Institute of Ophthalmology, NIHR Moorfields Biomedical Research Centre for Ophthalmology<br>Bowen, Michael; College of Optometry,<br>Bronze, Carol; Patient representative,<br>Bunce, Catey; Moorfields Eye Hospital NHS Foundation Trust, Ophthalmology; Institute of Ophthalmology, NIHR Moorfields Biomedical Research Centre for Ophthalmology<br>Conroy, Dolores; Fight for Sight,<br>Cowan, Katherine; James Lind Alliance (JLA) –National Institute for Health Research,<br>Evans, Kathy; Royal College of Ophthalmology,<br>Fenton, Mark; UK DUETs (NICE Evidence – UK Database of Uncertainties about the Effects of Treatments),<br>Giles, Heather; Patient representative,<br>Gordon, Iris; The Cochrane Eyes and Vision Group, London School of Hygiene and Tropical Medicine, Eyes and Vision<br>Halfhide, Louise; Institute of Ophthalmology, NIHR Moorfields Biomedical Research Centre for Ophthalmology<br>Harper, Robert; Manchester Royal Eye Hospital, Department of Optometry<br>Lightstone, Anita; VISION 2020 UK, UK Vision Strategy<br>Votruba, Marcela; Cardiff University, Department of Ophthalmology<br>Waterman, Heather; University of Manchester, Department of Nursing<br>Zekite, Antra; The Cochrane Eyes and Vision Group, London School of Hygiene and Tropical Medicine, Eyes and Vision |
| <b>Primary Subject Heading</b>: | Ophthalmology                                                                                                                                                                                                                                                                                                                                                                                                                                                                                                                                                                                                                                                                                                                                                                                                                                                                                                                                                                                                                                                                                                                                                                                                                                                                                                                                                                                                                                                                                                                                                                                                                                                                 |
| Secondary Subject Heading:      | Ophthalmology, Qualitative research                                                                                                                                                                                                                                                                                                                                                                                                                                                                                                                                                                                                                                                                                                                                                                                                                                                                                                                                                                                                                                                                                                                                                                                                                                                                                                                                                                                                                                                                                                                                                                                                                                           |
| Keywords:                       | Sight loss, Vision, Research, Priorities, Partnership, James Lind Alliance                                                                                                                                                                                                                                                                                                                                                                                                                                                                                                                                                                                                                                                                                                                                                                                                                                                                                                                                                                                                                                                                                                                                                                                                                                                                                                                                                                                                                                                                                                                                                                                                    |
|                                 |                                                                                                                                                                                                                                                                                                                                                                                                                                                                                                                                                                                                                                                                                                                                                                                                                                                                                                                                                                                                                                                                                                                                                                                                                                                                                                                                                                                                                                                                                                                                                                                                                                                                               |

1  
2  
3  
4  
5  
6  
7  
8  
9  
10  
11  
12  
13  
14  
15  
16  
17  
18  
19  
20  
21  
22  
23  
24  
25  
26  
27  
28  
29  
30  
31  
32  
33  
34  
35  
36  
37  
38  
39  
40  
41  
42  
43  
44  
45  
46  
47  
48  
49  
50  
51  
52  
53  
54  
55  
56  
57  
58  
59  
60

SCHOLARONE™  
Manuscripts

For peer review only

**The Sight Loss and Vision Priority Setting Partnership (SLV-PSP): Overview and results of the research prioritisation survey process.**

Fiona Rowe<sup>1</sup>, Richard Wormald<sup>2,3</sup>, Richard Cable<sup>4</sup>, Michele Acton<sup>4</sup>, Karen Bonstein<sup>5</sup>, Michael Bowen<sup>6</sup>, Carol Bronze<sup>7</sup>, Catey Bunce<sup>2,3,5</sup>, Dolores Conroy<sup>4</sup>, Katherine Cowan<sup>8</sup>, Kathy Evans<sup>9</sup>, Mark Fenton<sup>10</sup>, Heather Giles<sup>7</sup>, Iris Gordon<sup>3</sup>, Louise Halfhide<sup>5</sup>, Robert Harper<sup>11</sup>, Anita Lightstone<sup>12</sup>, Marcela Votruba<sup>13</sup>, Heather Waterman<sup>14</sup>, Antra Zekite<sup>2</sup>

1. British and Irish Orthoptic Society, London, UK
2. Department of Ophthalmology, Moorfields Eye Hospital NHS Foundation Trust, London, UK
3. The Cochrane Eyes and Vision Group, London School of Hygiene and Tropical Medicine, London, UK
4. Fight for Sight, London, UK
5. NIHR Moorfields Biomedical Research Centre for Ophthalmology, Institute of Ophthalmology, London, UK
6. College of Optometrists, London, UK
7. Patient representative
8. The James Lind Alliance (JLA) –National Institute for Health Research, Southampton, UK
9. Royal College of Ophthalmologists, London, UK
10. UK DUETs (NICE Evidence – UK Database of Uncertainties about the Effects of Treatments), London, UK
11. Department of Optometry, Manchester Royal Eye Hospital, Manchester, UK
12. UK Vision Strategy / VISION 2020 UK, London, UK
13. Department of Ophthalmology, Cardiff University, Cardiff, UK
14. Department of Nursing, University of Manchester, Manchester, UK

**Corresponding author:**

Dr Fiona Rowe

Department of Health Services Research,

1  
2  
3 WhelanBuilding (1.10),  
4

5 University of Liverpool,  
6

7 Brownlow Hill,  
8

9  
10 Liverpool L69 3GB  
11

12 T: 0151 7944956  
13

14 E: rowef@liverpool.ac.uk  
15  
16  
17  
18  
19

20 **Word count:** 2573  
21

22 **Number of figures:** 2  
23

24 **Number of tables:** 3  
25  
26

27 **Short title:** Sight Loss and Vision Priority Setting Partnership  
28  
29  
30  
31  
32  
33  
34  
35  
36  
37  
38  
39  
40  
41  
42  
43  
44  
45  
46  
47  
48  
49  
50  
51  
52  
53  
54  
55  
56  
57  
58  
59  
60

## Abstract

Objectives: The Sight Loss and Vision Priority Setting Partnership aimed to identify research priorities relating to sight loss and vision through consultation with patients, carers and clinicians. These priorities can be used to inform funding bodies' decisions and enhance the case for additional research funding.

Design: Prospective survey with support from the James Lind Alliance.

Setting: UK wide NHS and non-NHS.

Participants: Patients, carers and eye health professionals. Academic researchers were excluded solely from the prioritisation process. The survey was disseminated by patient groups, professional bodies, at conferences and through the media, and was available for completion online, by phone, by post and by alternative formats (Braille and audio).

Outcome measure: People were asked to submit the questions about prevention, diagnosis and treatment of sight loss and eye conditions that they most wanted to see answered by research. Returned survey questions were reviewed by a data assessment group. Priorities were established across eye disease categories at final workshops.

Results: 2,220 people responded generating 4,461 submissions. Sixty-five percent of respondents had sight loss and/or an eye condition. Following initial data analysis, 686 submissions remained which were circulated for interim prioritisation (excluding cataract and ocular cancer questions) to 446 patients/carers and 218 professionals. The remaining 346 questions were discussed at final prioritisation workshops to reach agreement of top questions per category.

Conclusions: The exercise engaged a diverse community of stakeholders generating a wide range of conditions and research questions. Top priority questions were established across 12 eye disease categories.

**Keywords:** Sight loss; Vision; Research; Priorities; Partnership; James Lind Alliance

## Article summary

Strengths and limitations of this study:

- 1
- 2
- 3 • Wide ranging and comprehensive coverage
- 4
- 5
- 6 • Substantial response
- 7
- 8 • The hardest to reach and those with the least opportunity to be heard may
- 9 indeed have not been heard
- 10
- 11
- 12 • Any such groups now feeling excluded should have an opportunity to redress
- 13 this.
- 14
- 15

## 16 Introduction

17  
18  
19 In the UK it is estimated that almost 2 million people are affected by sight loss and  
20 this number is expected to double by 2050<sup>1</sup>. Currently 50% of sight loss in the UK is  
21 avoidable but there are also many unavoidable sight loss conditions. Whether it is to  
22 address childhood eye conditions or those affecting adults, research is needed to  
23 inform us about prevention, to develop new techniques for early diagnosis and to  
24 develop new and more effective treatments for many eye conditions.  
25  
26

27  
28  
29 The Sight Loss and Vision Priority Setting Partnership (SLV-PSP) was developed  
30 from earlier work by the Eye Research Group (ERG) of VISION 2020 UK whose  
31 mission is the elimination of avoidable sight loss and the amelioration of the effects  
32 of sight loss when it cannot be avoided<sup>2</sup>. The UK Vision Strategy sets out ways of  
33 addressing avoidable sight loss in the UK. There is much that can be done to  
34 improve the nation's eye health, and to eliminate avoidable sight loss. There are  
35 however gaps in the evidence base regarding eye health interventions and the best  
36 way to deliver services. Research is needed to support the UK Vision Strategy. In  
37 key areas research is urgently required to enable the Vision Strategy to be  
38 implemented in an evidence-based way that ensures efficient and effective  
39 development.  
40  
41

42  
43  
44 Despite on-going research in the UK and other countries, there are still many  
45 questions about the prevention, diagnosis and treatment of sight loss and eye  
46 conditions that remain unanswered. Given that resources for research are limited, it  
47 is important for research funders to understand how patients, carers and eye health  
48 professionals prioritise these unanswered questions so that future research can be  
49 consolidated and targeted accordingly<sup>3</sup>.  
50  
51  
52  
53  
54  
55  
56  
57  
58  
59  
60

1  
2  
3 The purpose of this project was to undertake a comprehensive, UK-wide, survey of  
4 patients, carers and clinicians to identify research questions and priorities to inform  
5 decisions of funding bodies and enhance the case for additional research funding.  
6  
7

8  
9 The priority setting process has been well established by the James Lind Alliance  
10 (JLA) (<http://www.lindalliance.org/>) which has supported partnerships on a range of  
11 topics since 2004. This partnership initiated by Fight for Sight, the UK's leading eye  
12 research charity was established with support, financial and in kind, from the College  
13 of Optometrists, the Royal College of Ophthalmologists, the NIHR Biomedical  
14 Research Centre for Ophthalmology, the RNIB, UK Vision Strategy and the  
15 Cochrane Eyes and Vision Group. A representative from the JLA convened meetings  
16 of the steering committee and provided independent chairmanship for this and the  
17 priority setting workshops. Their extensive experience in this process ensured no  
18 single voice exerted undue influence over the prioritisation process and that the  
19 views of patients, their carers and clinicians were paramount. The views of  
20 researchers with no clinical involvement with patients and views of commercial  
21 organisations were not included in the prioritisation.  
22  
23  
24  
25  
26  
27  
28  
29  
30  
31  
32  
33

### 34 **Methods and materials**

35  
36 The detailed methods for this prioritisation process have been described in detail  
37 elsewhere<sup>4</sup>. In brief, the process comprised five stages (figure 1). Our study did not  
38 require ethical approval or consent from participants. James Lind Alliance priority  
39 setting partnerships do not require ethical approval. Dissemination of the survey is  
40 via open communications through professional bodies, charities and related  
41 organisations. The survey is not undertaken through Higher Education Institutes or  
42 through NHS organisations and does not recruit NHS patients. The survey contains  
43 clear information on the aims of the priority setting partnership, how the process  
44 works and how data will be used. In addition, submission of questions is  
45 anonymised. For the workshops in which priorities were discussed and agreed,  
46 participants choose to voluntarily attend and consent is not required for this. We  
47 followed the ethical guidance for participation, information and evaluation from the  
48 James Lind Alliance guidebook (<http://www.jla-guidebook.org/jla-guidebook.asp?val=56>).  
49  
50  
51  
52  
53  
54  
55  
56  
57  
58  
59  
60

### ***Establishing the SLV-PSP***

A steering committee and data assessment group comprising the authors of this article oversaw the process. Each member was responsible for contributing to and managing a part of the process and was selected for their expertise and association with eye research. The steering committee also included patient representatives and eye health professionals. In April 2012 an initial stakeholder meeting was held to engage the groups and organisations with member bases and community influence. This was to ensure that the initial survey would be disseminated and completed by as many patients, relatives, carers and eye health professionals as possible in the UK.

### ***Main survey***

The SLV-PSP survey was launched on 1 May 2012 and was open until 31 July 2012. The aim of the survey was to identify patients', carers' and eye health professionals' unanswered questions about sight loss and eye conditions. The survey's primary question was "What question(s) about the prevention, diagnosis and treatment of sight loss and eye conditions would you like to see answered by research?"

### ***Data analysis***

Following closure of the survey, all submissions were examined. Out-of-scope submissions were removed including those not related to the topic and uncertainties better suited to social research. In-scope uncertainties were allocated into disease-specific groups and re-worded in PICO format (Population, Intervention, Comparison, Outcome). Searches were then undertaken to ascertain whether or not each uncertainty could be answered by an up-to-date systematic review. All unanswered uncertainties were then allocated to one of 12 eye disease categories, with duplicates removed and similar questions combined. Checks were also made to identify any on-going trials which might address the uncertainty. The 12 categories were formed following discussions by the steering group on the most logical and pragmatic way to organise the data within the time and resources available.

### ***Interim prioritisation***



1  
2  
3 In order to start reducing the number of uncertainties, an interim prioritisation  
4 exercise was conducted over email and by post. Patients, carers and eye health  
5 professionals were invited to examine the long lists and then choose and rank 10 of  
6 the uncertainties.  
7  
8  
9

### 10 ***Final prioritisation***

11  
12 The remaining uncertainties were ranked by patients, carers, relatives, organisation  
13 representatives and eye health professionals in one-day workshops facilitated by the  
14 JLA, using Nominal Group Technique – a mix of discussion and ranking. For each  
15 category, the top 10/11 questions were agreed.  
16  
17  
18  
19  
20  
21  
22

## 23 **Results**

### 24 ***Main survey***

25  
26 In response to the survey, 2220 people generated 4461 submissions. Of these  
27 respondents, 17% identified themselves as healthcare professionals including  
28 primarily ophthalmologists, optometrists, orthoptists, ophthalmic nurses, opticians  
29 and people working in social care and rehabilitation (figure 2). Over 60% were  
30 people with sight loss or an eye condition. The average age of survey participants  
31 was 65.7 years old (range:16 months (proxy completion of survey by adult carer)to  
32 105 years). Just under two thirds (62%) of respondents were female. The  
33 geographical split was: England 89%; Scotland 6%; Wales 4%; Northern Ireland 1%.  
34  
35  
36  
37  
38  
39  
40  
41

### 42 ***Data analysis***

43  
44 Following data analysis to remove duplicate/answered/out of scope uncertainties,  
45 686 uncertainties remained. These were divided into twelve eye disease categories.  
46 Table 1 shows each category with the initial number of submissions received after  
47 the survey responses were submitted, the number of uncertainties sent to interim  
48 prioritisation, the number of participants at interim prioritisation and the number of  
49 uncertainties considered at the final prioritisation workshops.  
50  
51  
52  
53  
54

### 55 ***Interim prioritisation***

1  
2  
3 Respondents from the initial survey, organisations and eye healthcare professionals  
4 with expertise in the eye diseases in ten categories were contacted to provide interim  
5 priority rankings. The smaller number of questions asked in the categories relating to  
6 cataract and ocular cancer meant that an interim prioritisation exercise was not  
7 required for either category. A large response was received for the interim exercise,  
8 with input from 446 patients, carers and relatives plus 218 eye health professionals.  
9  
10 Uncertainties accumulated scores based on rank and frequency, resulting in short  
11 lists of around 30 uncertainties per category which were taken to final workshops.  
12  
13  
14  
15  
16

### ***Final prioritisation***

17  
18  
19 In April and May 2013, 12 final prioritisation workshops were held: one for each eye  
20 disease category. Balanced numbers of patients/carers/relatives and eye health  
21 professionals participated. In total, 155 participants attended across all 12  
22 workshops: 78 patients and 77 clinicians (table 2). The topics debated at each  
23 workshop comprised between 19-31 questions per category. Overall 153 questions  
24 about sight loss and vision were considered resulting in lists of 10/11 priorities for  
25 each of the 12 categories (table 3). The questions addressed the broad topics of  
26 aetiology, prevention, identification and interventions with the number 1 questions as  
27 follows:  
28  
29  
30  
31  
32  
33  
34

#### ***Age-related macular degeneration***

- 35  
36  
37  
38 1. Can a treatment to stop dry AMD progressing and/or developing into the wet  
39 form be devised?  
40

#### ***Cataract***

- 41  
42  
43  
44 1. How can cataracts be prevented from developing?  
45

#### ***Childhood-onset disorders***

- 46  
47  
48 1. How can cerebral visual impairment be identified, prevented and treated in  
49 children?  
50

#### ***Corneal and external diseases***

- 51  
52  
53  
54 1. Can new therapies such as gene or stem cell treatments be developed for  
55 corneal diseases?  
56

#### ***Glaucoma***

1. What are the most effective treatments for glaucoma and how can treatment be improved?

### ***Inherited retinal diseases***

1. Can a treatment to slow down progression or reverse sight loss in inherited retinal diseases be developed?

### ***Neuro-ophthalmology***

1. What is the underlying cause of optic nerve damage in optic neuropathies, such as anterior ischaemic optic neuropathy, Leber's hereditary optic neuropathy, optic neuritis and other optic neuropathies?

### ***Ocular cancer***

1. What can be done to help ocular cancer sufferers?

### ***Ocular inflammatory diseases***

1. What are the most effective treatments for ocular and orbital inflammatory diseases?

### ***Refractive error and ocular motility***

1. What factors influence the development of refractive error (myopia, astigmatism, presbyopia and long-sightedness)?

### ***Retinal vascular diseases***

1. What are the best methods to prevent retinopathy of prematurity?

### ***Vitreoretinal and ocular trauma***

1. How can surgical techniques be improved to save sight for eyes damaged by injury?

## **Discussion**

About 50% of sight loss in the UK is currently avoidable<sup>1</sup>. Recognising this and the UK's pre-eminent position in eye research, the Vision 2020UK ERG considered that any UK Research Agenda must look at addressing unavoidable sight loss for it to be credible. The challenge was to produce a coherently constructed and constituted prioritised research agenda whose methods were clear and for which there had been

1  
2  
3 inclusive and widespread consultation, where everyone with an interest had been  
4 offered the opportunity to contribute and be heard. As a result of this priority setting  
5 partnership we have established top ten lists of research questions for a range of  
6 eye conditions.  
7  
8

9  
10 There are a number of strengths to this study. The SLV-PSP is unique because it  
11 sought the combined views of patients, carers and eye health professionals to  
12 identify uncertainties about the prevention, diagnosis and treatment of sight loss and  
13 eye conditions and prioritise them for research to address<sup>5</sup>. It is rare that those with  
14 direct experience of conditions are able to influence the research agenda<sup>3,5,6</sup>. The  
15 views of patients, carers and professionals were given equal merit. All submitted  
16 questions were evaluated independently and equally. Duplicate questions and out of  
17 scope questions were removed. We did not encounter particularly  
18 misunderstandings between lay persons and professionals or insufficient knowledge  
19 of the public. Open discussions occurred during the face-to-face workshops with  
20 good communication and facilitation to encourage respectful listening in accordance  
21 with James Lind Alliance guidelines. Questions could only be pooled if this was  
22 agreed by patients, carers and professionals. Where there was no agreement, the  
23 questions remained separate. Thus, any differing perspectives of priorities between  
24 participants were acknowledged. We did not aim to compare and contrast questions  
25 from patients, carers and professionals but to represent and act on all.  
26  
27

28  
29 This SLV-PSP provided an extensive set of unanswered questions prioritised by  
30 patients, carers and eye health professionals across twelve categories of eye  
31 conditions. These questions addressed a broad range of eye conditions and  
32 considered issues of aetiology, prevention, screening, assessment and  
33 management. Importantly, the public were as likely to propose questions in relation  
34 to aetiology, assessment and management just as professionals were as likely to  
35 raise questions regarding impact of sight loss.  
36  
37

38  
39 In addition to the strengths of our study, we identified a number of limitations. We did  
40 not request the views of 'pure' researchers (i.e. scientists with no current clinical  
41 practice) as these individuals are intentionally excluded from the priority setting  
42 process by the James Lind Alliance. This step is a key feature of the James Lind  
43 Alliance methodology in which the remit is to provide an opportunity for patients,  
44  
45  
46  
47  
48  
49  
50  
51  
52  
53  
54  
55  
56  
57  
58  
59  
60

1  
2  
3 carers and clinicians to influence the research agenda. We acknowledge this is a  
4 different approach but do not consider their exclusion as a flaw in this process as we  
5 include clinical researchers who did take part alongside clinicians and the public.  
6  
7

8  
9 These questions may now be used to encourage researchers to investigate what is  
10 most important to these groups. We do not know how our research questions  
11 compare to the prioritisation of research areas by scientists, government agencies or  
12 other organisation research funders. We are unaware of any systematic data  
13 collating such data. However, similar to other PSP processes, we have provided  
14 information on our research priorities openly to national funding organisations and it  
15 is envisaged that research funders will be able to use the list to inform commissioned  
16 calls for research and identify which research applications to response mode funding  
17 opportunities can answer questions that these groups have agreed are a priority.  
18 Furthermore, any questions or uncertainties not prioritised in this process were  
19 submitted to and are currently available on the UK Database of Uncertainties about  
20 the Effects of Treatments (UK DUETs). Thus individuals looking for uncertainties for  
21 their research can access such information direct from UK DUETs. This sharing of  
22 information contributes to the quality assurance process of avoiding waste in  
23 research.  
24  
25  
26  
27  
28  
29  
30  
31  
32  
33

34 The SLV-PSP will also help to increase awareness of why research into sight loss  
35 and vision is necessary and important. It will be used to campaign for major funders  
36 to invest in sight loss and eye conditions, all of which are placing increased  
37 emphasis on researchers demonstrating how they have consulted and involved the  
38 public and patients in the process of developing their research.  
39  
40  
41  
42  
43

44 These remain significant goals. For a sector with around 700 organisations to arrive  
45 at any kind of consensus for research priority areas, a process that was genuinely  
46 consultative, open and engaging to the individuals whose interests these  
47 organisations represent as well as at an organisational level was recognised as  
48 being critical. For a prioritisation exercise to be useful to the sector it needed to  
49 make sense to funders and statutory bodies with responsibilities and interests in  
50 these areas as well as to researchers. It was recognised that a prioritisation of  
51 research areas produced by a small group within the sector would not be credible  
52 and would never engage the support required for it to achieve the goals listed above.  
53  
54  
55  
56  
57  
58  
59  
60

## Conclusions

Following a systematic process of national consultation and widespread survey of patients, carers and clinicians, 2220 individuals generated 4461 questions. Through a process of data analysis, interim prioritisation and final workshops, a top ten or eleven research questions have been identified for twelve categories of eye conditions. This is the first time, to our knowledge, that an exercise like this has been carried out anywhere in the world for sight loss and vision. Not only is this the most wide ranging and ambitious James Lind Alliance priority setting partnership, it also engaged a diversity of participants and enabled them to reach consensus together. For the first time, we have a clear idea of what the consumers of eye research – the patients and the people who care for and treat them – believe research money should be spent on. It has provided a focus for research in sight loss and vision and it is intended that these priorities are used to inform funders, researchers, clinicians and the public.

1  
2  
3 **Competing interests:** The authors declare that they have no competing interests.  
4

5 **Funding:** This work was supported through funding and/or in-kind support by  
6 College of Optometrists, Fight for Sight, James Lind Alliance, NIHR Moorfields BRC,  
7 RNIB, Royal College of Ophthalmologists and UK Vision Strategy.  
8  
9

10 **Author contributions:** FR, RW, RC, MA, KB, MB, CBr, CBu, DC, KC, KE, MF, HG,  
11 IG, LH, RH, AL, MV, HW and AZ contributed to the conduct of the survey. FR, RW,  
12 RC, MA, MB, DC and KC were involved in the drafting of the paper. KB, CBr, CBu,  
13 KE, MF, HG, IG, LH, RH, AL, MV, HW and AZ contributed to proofing of the paper.  
14  
15  
16  
17

18 **Data sharing statement:** All original data are held by Fight for Sight. Extra data is  
19 available from: <http://www.library.nhs.uk/duets/SearchResults.aspx?catID=14501>  
20  
21  
22  
23  
24  
25  
26  
27  
28  
29  
30  
31  
32  
33  
34  
35  
36  
37  
38  
39  
40  
41  
42  
43  
44  
45  
46  
47  
48  
49  
50  
51  
52  
53  
54  
55  
56  
57  
58  
59  
60

## References

1. Access Economics (2009) Future Sight Loss UK 1: The economic impact of partial sight and blindness in the UK adult population, RNIB
2. <http://www.vision2020uk.org.uk/>
3. Chalmers, I. and Glasziou, P. (2009) 'Avoidable waste in the production and reporting of research evidence', *The Lancet*, Vol. 374, pp. 86–89.
4. Sight loss and vision priority setting partnership. Setting priorities for eye research. (2013) Final report. [www.sightlosspsp.org.uk](http://www.sightlosspsp.org.uk)
5. Stewart, R. and Oliver, S. (2008) *A systematic map of studies of patients' and clinicians' research priorities*. London: James Lind Alliance.
6. Caron-Flinterman J, et al. (2006) Patients priorities concerning health research: the case of asthma and COPD research in the Netherlands. *Health Expectations*, 8, pp253–263.



Table 1 Categories of eye condition

|                                         | Initial number of survey questions | Number of questions at interim prioritisation | Number of participants at interim prioritisation | Number of questions at final prioritisation |
|-----------------------------------------|------------------------------------|-----------------------------------------------|--------------------------------------------------|---------------------------------------------|
| <b>Age-related macular degeneration</b> | 763                                | 43                                            | 101 PPI<br>25 Professionals                      | 29                                          |
| <b>Cataract</b>                         | 191                                | 27                                            | Not required                                     | 27                                          |
| <b>Childhood-onset disorders</b>        | 125                                | 69                                            | 12 PPI<br>20 Professionals                       | 30                                          |
| <b>Corneal and external diseases</b>    | 292                                | 93                                            | 25 PPI<br>38 Professionals                       | 30                                          |
| <b>Glaucoma</b>                         | 1235                               | 78                                            | 182 PPI<br>25 Professionals                      | 30                                          |
| <b>Inherited retinal diseases</b>       | 280                                | 63                                            | 27 PPI<br>25 Professionals                       | 30                                          |
| <b>Neuro-ophthalmology</b>              | 125                                | 43                                            | 15 PPI<br>21 Professionals                       | 30                                          |
| <b>Ocular cancer</b>                    | 26                                 | 19                                            | Not required                                     | 19                                          |
| <b>Ocular inflammatory diseases</b>     | 472                                | 66                                            | 27 PPI<br>21 Professionals                       | 30                                          |

|                                             |     |    |                            |    |
|---------------------------------------------|-----|----|----------------------------|----|
| <b>Refractive error and ocular motility</b> | 188 | 70 | 21 PPI<br>23 Professionals | 31 |
| <b>Retinal vascular diseases</b>            | 205 | 56 | 15 PPI<br>12 Professionals | 30 |
| <b>Vitreoretinal and ocular trauma</b>      | 265 | 59 | 21 PPI<br>8 Professionals  | 30 |

PPI: Inclusive of patients, carers, relatives, organisation representatives.

Professionals: Inclusive of eye health professions.

**Table 2** Final workshop participants

| Category                             | Total number of workshop participants | Number of patients, relatives, carers, patient groups and organisations | Number of eye health professionals |
|--------------------------------------|---------------------------------------|-------------------------------------------------------------------------|------------------------------------|
| Age-related Macular Degeneration     | 17                                    | 9                                                                       | 8                                  |
| Cataract                             | 11                                    | 5                                                                       | 6                                  |
| Childhood-Onset Disorders            | 16                                    | 7                                                                       | 9                                  |
| Corneal and External Diseases        | 12                                    | 5                                                                       | 7                                  |
| Glaucoma                             | 17                                    | 9                                                                       | 8                                  |
| Inherited Retinal Diseases           | 19                                    | 11                                                                      | 8                                  |
| Neuro-ophthalmology                  | 10                                    | 6                                                                       | 4                                  |
| Ocular Cancer                        | 10                                    | 6                                                                       | 4                                  |
| Ocular Inflammatory Diseases         | 10                                    | 5                                                                       | 5                                  |
| Refractive Error and Ocular Motility | 12                                    | 5                                                                       | 7                                  |
| Retinal Vascular Diseases            | 11                                    | 3                                                                       | 8                                  |
| Vitreoretinal and Ocular Trauma      | 10                                    | 7                                                                       | 3                                  |
| <b>TOTAL</b>                         | <b>155</b>                            | <b>78</b>                                                               | <b>77</b>                          |

**Table 3** Top ten lists per category

|    | <b>Age-related macular degeneration</b>                                                                                            | <b>Cataract</b>                                                                                                                                | <b>Childhood-onset disorders</b>                                                                                                                              | <b>Corneal and external diseases</b>                                                                    | <b>Glaucoma</b>                                                                                           | <b>Inherited retinal diseases</b>                                                                                                                                           |
|----|------------------------------------------------------------------------------------------------------------------------------------|------------------------------------------------------------------------------------------------------------------------------------------------|---------------------------------------------------------------------------------------------------------------------------------------------------------------|---------------------------------------------------------------------------------------------------------|-----------------------------------------------------------------------------------------------------------|-----------------------------------------------------------------------------------------------------------------------------------------------------------------------------|
| 1  | Can a treatment to stop dry AMD progressing and/or developing into the wet form be devised?                                        | How can cataracts be prevented from developing?                                                                                                | How can cerebral visual impairment be identified, prevented and treated in children?                                                                          | Can new therapies such as gene or stem cell treatments be developed for corneal diseases?               | What are the most effective treatments for glaucoma and how can treatment be improved?                    | Can a treatment to slow down progression or reverse sight loss in inherited retinal diseases be developed?                                                                  |
| 2  | What is the cause of AMD?                                                                                                          | Can the return of cloudy or blurred vision after cataract surgery known as posterior capsule opacity (PCO) or secondary cataract be prevented? | How can treatment for visual pathway damage associated with pre-term birth be developed?                                                                      | What is the most effective management for dry eye and can new strategies be developed?                  | How can loss of vision be restored for people with glaucoma?                                              | How can sight loss be prevented in an individual with inherited retinal disease?                                                                                            |
| 3  | How can AMD be prevented?                                                                                                          | How can cataract progression be slowed down?                                                                                                   | How do we improve screening and surveillance from the ante-natal period through to childhood to ensure early diagnosis of impaired vision and eye conditions? | Can treatments to save eye sight from microbial keratitis be improved?                                  | How can glaucoma be stopped from progressing?                                                             | Is a genetic (molecular) diagnosis possible for all inherited retinal diseases?                                                                                             |
| 4  | Are there ways of restoring sight loss for people with AMD?                                                                        | What alternatives to treat cataracts other than cataract surgery are being developed?                                                          | Can the treatment of amblyopia be improved to produce better short and long term outcomes than are possible with current treatments?                          | How can the rejection of corneal transplants be prevented?                                              | What can be done to improve early diagnosis of sight-threatening glaucoma?                                | What factors affect the progression of sight loss in inherited retinal diseases?                                                                                            |
| 5  | Can the development of AMD be predicted?                                                                                           | What is the cause of cataract?                                                                                                                 | How can cataract be prevented in children?                                                                                                                    | Can the outcomes of corneal transplantation be improved?                                                | What causes glaucoma?                                                                                     | What causes sight loss in inherited retinal diseases?                                                                                                                       |
| 6  | What is the most effective way to detect and monitor the progression of early AMD?                                                 | How can cataract surgery outcomes be improved?                                                                                                 | What are the causes of coloboma and microphthalmia/anophthalmia and how can they be prevented?                                                                | What causes keratoconus to progress and can progression be prevented?                                   | What is the most effective way of monitoring the progression of glaucoma?                                 | What is the most effective way to support patients with inherited retinal disease?                                                                                          |
| 7  | What factors influence the progression of AMD?                                                                                     | How safe and effective is laser assisted cataract surgery?                                                                                     | Can vision be corrected in later life for people with amblyopia?                                                                                              | Can non-surgical therapy be developed for Fuchs' corneal dystrophy?                                     | How can glaucoma patients with a higher risk to progress rapidly be detected?                             | Can the diagnosis of inherited retinal diseases be refined so that individuals can be given a clearer idea about their specific condition and how it is likely to progress? |
| 8  | Can a non-invasive therapy be developed for wet AMD?                                                                               | Should accommodative lenses be developed for cataract surgery?                                                                                 | How can retinoblastoma be identified, prevented and treated in children?                                                                                      | Can corneal infections be prevented in high-risk individuals such as contact lens wearers?              | Why is glaucoma more aggressive in people of certain ethnic groups, such as those of West African origin? | What is the relationship between sight loss and mental health for people with inherited retinal diseases?                                                                   |
| 9  | Can dietary factors, nutritional supplements, complementary therapies or lifestyle changes prevent or slow the progression of AMD? | What is the best measure of visual disability due to cataract?                                                                                 | Can better treatments for glaucoma in children be developed?                                                                                                  | What is the cause of keratoconus and can it be prevented?                                               | How can glaucoma be prevented?                                                                            | Would having a treatment for an inherited retinal disease preclude a patient from having another treatment?                                                                 |
| 10 | What are the best enablement strategies for people with AMD?                                                                       | Can retinal detachment be prevented after cataract surgery?                                                                                    | Can a treatment be developed to improve vision for people with albinism?                                                                                      | What is the most effective management of ocular complications associated with Stevens Johnson Syndrome? | Is there a link between treatment adherence and glaucoma progression and how can adherence be improved?   | With regard to inherited retinal diseases what is the role of pre-natal and pre-implantation diagnosis in helping parents make informed choices?                            |
| 11 |                                                                                                                                    | What are the outcomes for cataract surgery among people with different levels of cognitive                                                     |                                                                                                                                                               | Can severe ocular surface disease in children, such as blepharokeratoconjunctivitis and                 |                                                                                                           |                                                                                                                                                                             |

|    | <i>Neuro-ophthalmology</i> | <i>Ocular cancer</i>                                                                                               | <i>Ocular inflammatory diseases</i>                                                        | <i>Refractive error and ocular motility</i>                                                                                                                                                       | <i>Retinal vascular diseases</i>                                                                                     | <i>Vitreoretinal and ocular trauma</i>                                                                    |
|----|----------------------------|--------------------------------------------------------------------------------------------------------------------|--------------------------------------------------------------------------------------------|---------------------------------------------------------------------------------------------------------------------------------------------------------------------------------------------------|----------------------------------------------------------------------------------------------------------------------|-----------------------------------------------------------------------------------------------------------|
| 1  |                            | impairment (all causes excluding dementia, stroke, neurological conditions, head injuries)?                        |                                                                                            | vernal keratoconjunctivitis be managed better?                                                                                                                                                    |                                                                                                                      |                                                                                                           |
| 2  |                            |                                                                                                                    |                                                                                            |                                                                                                                                                                                                   |                                                                                                                      |                                                                                                           |
| 3  |                            |                                                                                                                    |                                                                                            |                                                                                                                                                                                                   |                                                                                                                      |                                                                                                           |
| 4  |                            |                                                                                                                    |                                                                                            |                                                                                                                                                                                                   |                                                                                                                      |                                                                                                           |
| 5  |                            |                                                                                                                    |                                                                                            |                                                                                                                                                                                                   |                                                                                                                      |                                                                                                           |
| 6  |                            |                                                                                                                    |                                                                                            |                                                                                                                                                                                                   |                                                                                                                      |                                                                                                           |
| 7  |                            |                                                                                                                    |                                                                                            |                                                                                                                                                                                                   |                                                                                                                      |                                                                                                           |
| 8  | <b>1</b>                   | What can be done to help ocular cancer sufferers?                                                                  | What are the most effective treatments for ocular and orbital inflammatory diseases?       | What factors influence the development of refractive error (myopia, astigmatism, presbyopia and long-sightedness)?                                                                                | What are the best methods to prevent retinopathy of prematurity?                                                     | How can surgical techniques be improved to save sight for eyes damaged by injury?                         |
| 9  |                            |                                                                                                                    |                                                                                            |                                                                                                                                                                                                   |                                                                                                                      |                                                                                                           |
| 10 |                            |                                                                                                                    |                                                                                            |                                                                                                                                                                                                   |                                                                                                                      |                                                                                                           |
| 11 |                            |                                                                                                                    |                                                                                            |                                                                                                                                                                                                   |                                                                                                                      |                                                                                                           |
| 12 |                            |                                                                                                                    |                                                                                            |                                                                                                                                                                                                   |                                                                                                                      |                                                                                                           |
| 13 |                            |                                                                                                                    |                                                                                            |                                                                                                                                                                                                   |                                                                                                                      |                                                                                                           |
| 14 | <b>2</b>                   | Can gene-based targeted therapies for ocular cancers be developed?                                                 | What causes thyroid eye disease?                                                           | What is the cause of both congenital and acquired nystagmus?                                                                                                                                      | How can sight loss from diabetic retinal changes be prevented and reduced?                                           | How can the risk of losing sight for people with retinal detachment be reduced?                           |
| 15 |                            |                                                                                                                    |                                                                                            |                                                                                                                                                                                                   |                                                                                                                      |                                                                                                           |
| 16 |                            |                                                                                                                    |                                                                                            |                                                                                                                                                                                                   |                                                                                                                      |                                                                                                           |
| 17 |                            |                                                                                                                    |                                                                                            |                                                                                                                                                                                                   |                                                                                                                      |                                                                                                           |
| 18 |                            |                                                                                                                    |                                                                                            |                                                                                                                                                                                                   |                                                                                                                      |                                                                                                           |
| 19 | <b>3</b>                   | How can immunotherapy be used to fight metastatic ocular melanoma?                                                 | Can the severity of ocular and orbital inflammatory disease in an individual be predicted? | How can the development of binocular vision in young children with squint and amblyopia be promoted, and would the same approach work in older individuals without inducing intractable diplopia? | What are the predictive factors for the progression to sight threatening diabetic eye disease?                       | How can better interventions be developed that are effective in treating vitreous opacities/eye floaters? |
| 20 |                            |                                                                                                                    |                                                                                            |                                                                                                                                                                                                   |                                                                                                                      |                                                                                                           |
| 21 |                            |                                                                                                                    |                                                                                            |                                                                                                                                                                                                   |                                                                                                                      |                                                                                                           |
| 22 |                            |                                                                                                                    |                                                                                            |                                                                                                                                                                                                   |                                                                                                                      |                                                                                                           |
| 23 |                            |                                                                                                                    |                                                                                            |                                                                                                                                                                                                   |                                                                                                                      |                                                                                                           |
| 24 |                            |                                                                                                                    |                                                                                            |                                                                                                                                                                                                   |                                                                                                                      |                                                                                                           |
| 25 | <b>4</b>                   | What are the most effective detection and screening methods for follow up to detect metastasis of ocular melanoma? | Is it possible to prevent further occurrences of retinal damage caused by toxoplasmosis?   | Would correction of refractive error have a positive impact on early life learning and development?                                                                                               | Is there a way to improve screening of premature babies for retinopathy of prematurity?                              | What causes retinal detachment and can it be prevented?                                                   |
| 26 |                            |                                                                                                                    |                                                                                            |                                                                                                                                                                                                   |                                                                                                                      |                                                                                                           |
| 27 |                            |                                                                                                                    |                                                                                            |                                                                                                                                                                                                   |                                                                                                                      |                                                                                                           |
| 28 |                            |                                                                                                                    |                                                                                            |                                                                                                                                                                                                   |                                                                                                                      |                                                                                                           |
| 29 |                            |                                                                                                                    |                                                                                            |                                                                                                                                                                                                   |                                                                                                                      |                                                                                                           |
| 30 |                            |                                                                                                                    |                                                                                            |                                                                                                                                                                                                   |                                                                                                                      |                                                                                                           |
| 31 | <b>5</b>                   | How can follow-up for ocular complications be managed in patients with ocular melanoma?                            | What causes birdshot retinopathy?                                                          | Does early diagnosis of refractive error improve long-term prognosis and promote faster, more effective treatment?                                                                                | Can an effective long lasting treatment for diabetic macular oedema, both ischaemic and non-ischaemic, be developed? | Can more effective diagnostic tools be developed for assessing the vitreous and eye floaters?             |
| 32 |                            |                                                                                                                    |                                                                                            |                                                                                                                                                                                                   |                                                                                                                      |                                                                                                           |
| 33 |                            |                                                                                                                    |                                                                                            |                                                                                                                                                                                                   |                                                                                                                      |                                                                                                           |
| 34 |                            |                                                                                                                    |                                                                                            |                                                                                                                                                                                                   |                                                                                                                      |                                                                                                           |
| 35 | <b>6</b>                   | What is the best management of metastatic choroidal melanoma?                                                      | Why does disease burn out in patients with ocular and orbital inflammatory diseases?       | What is the effect of congenital nystagmus on visual and emotional development?                                                                                                                   | Can a retinal vein occlusion be predicted and prevented?                                                             | Can a functioning prosthetic eye be developed to replace an eye damaged by injury?                        |
| 36 |                            |                                                                                                                    |                                                                                            |                                                                                                                                                                                                   |                                                                                                                      |                                                                                                           |
| 37 |                            |                                                                                                                    |                                                                                            |                                                                                                                                                                                                   |                                                                                                                      |                                                                                                           |
| 38 | <b>7</b>                   | What activates choroidal melanoma metastasis in the liver after the primary melanoma has been treated?             | Can early detection methods be developed for ocular and orbital inflammatory diseases?     | What is the most effective treatment for exotropia and when should it be delivered?                                                                                                               | Can new non-invasive treatments be developed to slow down the progression of diabetic retinopathy?                   | How can epiretinal membrane/fibrosis be prevented or treated?                                             |
| 39 |                            |                                                                                                                    |                                                                                            |                                                                                                                                                                                                   |                                                                                                                      |                                                                                                           |
| 40 |                            |                                                                                                                    |                                                                                            |                                                                                                                                                                                                   |                                                                                                                      |                                                                                                           |
| 41 |                            |                                                                                                                    |                                                                                            |                                                                                                                                                                                                   |                                                                                                                      |                                                                                                           |
| 42 |                            |                                                                                                                    |                                                                                            |                                                                                                                                                                                                   |                                                                                                                      |                                                                                                           |
| 43 | <b>8</b>                   | Can adjuvant therapies be developed to treat ocular                                                                | What medications best prevent the development of eye disease in                            | How can the functional effects of surgical treatment for squint best                                                                                                                              | What are the barriers that prevent diabetic patients                                                                 | Can stem cells be used to regrow an eye or part of an eye?                                                |
| 44 |                            |                                                                                                                    |                                                                                            |                                                                                                                                                                                                   |                                                                                                                      |                                                                                                           |

1  
2  
3  
4  
5  
6  
7  
8  
9  
10  
11  
12  
13  
14  
15  
16  
17  
18  
19  
20  
21  
22  
23  
24  
25  
26  
27  
28  
29  
30  
31  
32  
33  
34  
35  
36  
37  
38  
39  
40  
41  
42  
43  
44  
45  
46  
47  
48  
49

|    |                                                                                                                                       |                                                                                  |                                                                |                                                                                                                                                |                                                                                                                                     |                                                                          |
|----|---------------------------------------------------------------------------------------------------------------------------------------|----------------------------------------------------------------------------------|----------------------------------------------------------------|------------------------------------------------------------------------------------------------------------------------------------------------|-------------------------------------------------------------------------------------------------------------------------------------|--------------------------------------------------------------------------|
| 9  | motility manifestations following stroke?<br>How can electronic devices improve or restore vision for people with optic neuropathies? | melanoma?<br>What are the causes of ocular cancer and how can they be prevented? | Behcets?<br>What causes scleritis?                             | be assessed?<br>Could the accurate testing of refractive error be made less dependent on a subjective response i.e. the person's own response? | having regular eye checks?<br>What rehabilitation programmes are best for the management of distorted vision from retinal diseases? | What causes posterior vitreous detachment/vitreous syneresis?            |
| 10 | Can an alternative or new treatment be developed that will treat the sight loss caused by giant cell arteritis?                       | What is the most effective treatment for primary ocular melanoma?                | Can diet or lifestyle changes prevent uveitis from developing? | How can myopia be prevented?                                                                                                                   | What is the efficacy and safety of anti-VEGF agents in the treatment of retinopathy of prematurity?                                 | Are there methods to prevent and improve the treatment of macular holes? |

For peer review only

1  
2  
3  
4  
5  
6  
7 **Figure legends**

8  
9 Figure 1: Flowchart showing the steps of the process from Stage 1 when establishing the PSP through to Stage 5 at the final prioritisation.

10  
11  
12 Figure 2: Background of respondents showing that questions were largely received from people who have sight loss or an eye condition, but also  
13 including eye health professions, organisations, parents, family and carers.  
14  
15  
16  
17  
18  
19  
20  
21  
22  
23  
24  
25  
26  
27  
28  
29  
30  
31  
32  
33  
34  
35  
36  
37  
38  
39  
40  
41  
42  
43  
44  
45  
46  
47  
48  
49

**The Sight Loss and Vision Priority Setting Partnership (SLV-PSP): Overview and results of the research prioritisation survey process.**

Fiona Rowe<sup>1</sup>, Richard Wormald<sup>2,3</sup>, Richard Cable<sup>4</sup>, Michele Acton<sup>4</sup>, Karen Bonstein<sup>5</sup>, Michael Bowen<sup>6</sup>, Carol Bronze<sup>7</sup>, Catey Bunce<sup>2,3,5</sup>, Dolores Conroy<sup>4</sup>, Katherine Cowan<sup>8</sup>, Kathy Evans<sup>9</sup>, Mark Fenton<sup>10</sup>, Heather Giles<sup>7</sup>, Iris Gordon<sup>3</sup>, Louise Halfhide<sup>5</sup>, Robert Harper<sup>11</sup>, Anita Lightstone<sup>12</sup>, Marcela Votruba<sup>13</sup>, Heather Waterman<sup>14</sup>, Antra Zekite<sup>2</sup>

1. British and Irish Orthoptic Society, London, UK
2. Department of Ophthalmology, Moorfields Eye Hospital NHS Foundation Trust, London, UK
3. The Cochrane Eyes and Vision Group, London School of Hygiene and Tropical Medicine, London, UK
4. Fight for Sight, London, UK
5. NIHR Moorfields Biomedical Research Centre for Ophthalmology, Institute of Ophthalmology, London, UK
6. College of Optometrists, London, UK
7. Patient representative
8. The James Lind Alliance (JLA) –National Institute for Health Research, Southampton, UK
9. Royal College of Ophthalmologists, London, UK
10. UK DUETs (NICE Evidence – UK Database of Uncertainties about the Effects of Treatments), London, UK
11. Department of Optometry, Manchester Royal Eye Hospital, Manchester, UK
12. UK Vision Strategy / VISION 2020 UK, London, UK
13. Department of Ophthalmology, Cardiff University, Cardiff, UK
14. Department of Nursing, University of Manchester, Manchester, UK

**Corresponding author:**

Dr Fiona Rowe

Department of Health Services Research,



1  
2  
3 WhelanBuilding (1.10),  
4

5 University of Liverpool,  
6

7 Brownlow Hill,  
8

9  
10 Liverpool L69 3GB  
11

12  
13 T: 0151 7944956  
14

15 E: rowef@liverpool.ac.uk  
16  
17  
18  
19

20 **Word count:** 2573  
21

22 **Number of figures:** 2  
23

24 **Number of tables:** 3  
25

26  
27 **Short title:** Sight Loss and Vision Priority Setting Partnership  
28

29  
30 **Competing interests:** The authors declare that they have no competing interests.  
31

32  
33 **Funding:** This work was supported through funding and/or in-kind support by  
34 College of Optometrists, Fight for Sight, James Lind Alliance, NIHR Moorfields BRC,  
35 RNIB, Royal College of Ophthalmologists and UK Vision Strategy.  
36  
37

38  
39 **Author contributions:** FR, RW, RC, MA, KB, MB, CBr, CBu, DC, KC, KE, MF, HG,  
40 IG, LH, RH, AL, MV, HW and AZ contributed to the conduct of the survey. FR, RW,  
41 RC, MA, MB, DC and KC were involved in the drafting of the paper. KB, CBr, CBu,  
42 KE, MF, HG, IG, LH, RH, AL, MV, HW and AZ contributed to proofing of the paper.  
43  
44

45  
46 **Data sharing statement:** All original data are held by Fight for Sight and James Lind  
47 Alliance.  
48

## 49 50 51 52 **Abstract** 53

54  
55 Objectives: The Sight Loss and Vision Priority Setting Partnership aimed to identify  
56 research priorities relating to sight loss and vision through consultation with patients,  
57  
58  
59  
60

1  
2  
3 carers and clinicians. These priorities can be used to inform funding bodies'  
4 decisions and enhance the case for additional research funding.  
5  
6

7 Design: Prospective survey with support from the James Lind Alliance.  
8

9  
10 Setting: UK wide NHS and non-NHS.  
11

12 Participants: Patients, carers and eye health professionals. Academic researchers  
13 were excluded **solely from the prioritisation process**. The survey was disseminated  
14 by patient groups, professional bodies, at conferences and through the media, and  
15 was available for completion online, by phone, by post and by alternative formats  
16 (Braille and audio).  
17  
18  
19

20  
21 Outcome measure: People were asked to submit the questions about prevention,  
22 diagnosis and treatment of sight loss and eye conditions that they most wanted to  
23 see answered by research. Returned survey questions were reviewed by a data  
24 assessment group. **Priorities** were established across eye disease categories at final  
25 workshops.  
26  
27  
28

29  
30 Results: 2,220 people responded generating 4,461 submissions. Sixty-five percent  
31 of respondents had sight loss and/or an eye condition. Following initial data analysis,  
32 686 submissions remained which were circulated for interim prioritisation (excluding  
33 cataract and ocular cancer questions) to 446 patients/carers and 218 professionals.  
34 The remaining 346 questions were discussed at final prioritisation workshops to  
35 reach agreement of top questions per category.  
36  
37  
38  
39

40  
41 Conclusions: The exercise engaged a diverse community of stakeholders generating  
42 a wide range of conditions and research questions. Top priority questions were  
43 established across 12 eye disease categories.  
44  
45  
46

47 **Keywords:** Sight loss; Vision; Research; Priorities; Partnership; James Lind Alliance  
48

## 49 **Article summary**

50  
51 Strengths and limitations of this study:  
52

- 53 • Wide ranging and comprehensive coverage
- 54
- 55 • Substantial response
- 56
- 57
- 58
- 59
- 60

- The hardest to reach and those with the least opportunity to be heard may indeed have not been heard
- Any such groups now feeling excluded should have an opportunity to redress this.

## Introduction

In the UK it is estimated that almost 2 million people are affected by sight loss and this number is expected to double by 2050<sup>1</sup>. Currently 50% of sight loss in the UK is avoidable but there are also many unavoidable sight loss conditions. Whether it is to address childhood eye conditions or those affecting adults, research is needed to inform us about prevention, to develop new techniques for early diagnosis and to develop new and more effective treatments for many eye conditions.

The Sight Loss and Vision Priority Setting Partnership (SLV-PSP) was developed from earlier work by the Eye Research Group (ERG) of VISION 2020 UK whose mission is the elimination of avoidable sight loss and the amelioration of the effects of sight loss when it cannot be avoided<sup>2</sup>. The UK Vision Strategy sets out ways of addressing avoidable sight loss in the UK. There is much that can be done to improve the nation's eye health, and to eliminate avoidable sight loss. There are however gaps in the evidence base regarding eye health interventions and the best way to deliver services. Research is needed to support the UK Vision Strategy. In key areas research is urgently required to enable the Vision Strategy to be implemented in an evidence-based way that ensures efficient and effective development.

Despite on-going research in the UK and other countries, there are still many questions about the prevention, diagnosis and treatment of sight loss and eye conditions that remain unanswered. Given that resources for research are limited, it is important for research funders to understand how patients, carers and eye health professionals prioritise these unanswered questions so that future research can be consolidated and targeted accordingly<sup>3</sup>.

The purpose of this project was to undertake a comprehensive, UK-wide, survey of patients, carers and clinicians to identify research questions and priorities to inform decisions of funding bodies and enhance the case for additional research funding.

1  
2  
3 The priority setting process has been well established by the James Lind Alliance  
4 (JLA) (<http://www.lindalliance.org/>) which has supported partnerships on a range of  
5 topics since 2004. This partnership initiated by Fight for Sight, the UK's leading eye  
6 research charity was established with support, financial and in kind, from the College  
7 of Optometrists, the Royal College of Ophthalmologists, the NIHR Biomedical  
8 Research Centre for Ophthalmology, the RNIB, UK Vision Strategy and the  
9 Cochrane Eyes and Vision Group. A representative from the JLA convened meetings  
10 of the steering committee and provided independent chairmanship for this and the  
11 priority setting workshops. Their extensive experience in this process ensured no  
12 single voice exerted undue influence over the prioritisation process and that the  
13 views of patients, their carers and clinicians were paramount. The views of  
14 researchers with no clinical involvement with patients and views of commercial  
15 organisations were not included in the prioritisation.

## 26 27 28 **Methods and materials**

29  
30 The detailed methods for this prioritisation process have been described in detail  
31 elsewhere<sup>4</sup>. In brief, the process comprised five stages (figure 1). Our study did not  
32 require ethical approval or consent from participants. James Lind Alliance priority  
33 setting partnerships do not require ethical approval. Dissemination of the survey is  
34 via open communications through professional bodies, charities and related  
35 organisations. The survey is not undertaken through Higher Education Institutes or  
36 through NHS organisations and does not recruit NHS patients. The survey contains  
37 clear information on the aims of the priority setting partnership, how the process  
38 works and how data will be used. In addition, submission of questions is  
39 anonymised. For the workshops in which priorities were discussed and agreed,  
40 participants choose to voluntarily attend and consent is not required for this. We  
41 followed the ethical guidance for participation, information and evaluation from the  
42 James Lind Alliance guidebook ([http://www.jlaguebook.org/jla-  
43 guidebook.asp?val=56](http://www.jlaguebook.org/jla-guidebook.asp?val=56)).

## 44 45 46 47 48 49 50 51 52 53 54 ***Establishing the SLV-PSP***

1  
2  
3 A steering committee and data assessment group comprising the authors of this  
4 article oversaw the process. Each member was responsible for contributing to and  
5 managing a part of the process and was selected for their expertise and association  
6 with eye research. The steering committee also included patient representatives  
7 and eye health professionals. In April 2012 an initial stakeholder meeting was held to  
8 engage the groups and organisations with member bases and community influence.  
9 This was to ensure that the initial survey would be disseminated and completed by  
10 as many patients, relatives, carers and eye health professionals as possible in the  
11 UK.  
12  
13  
14  
15  
16  
17  
18

### 19 ***Main survey***

20  
21 The SLV-PSP survey was launched on 1 May 2012 and was open until 31 July 2012.  
22 The aim of the survey was to identify patients', carers' and eye health professionals'  
23 unanswered questions about sight loss and eye conditions. The survey's primary  
24 question was "What question(s) about the prevention, diagnosis and treatment of  
25 sight loss and eye conditions would you like to see answered by research?"  
26  
27  
28  
29

### 30 ***Data analysis***

31  
32 Following closure of the survey, all submissions were examined. Out-of-scope  
33 submissions were removed including those not related to the topic and uncertainties  
34 better suited to social research. In-scope uncertainties were allocated into disease-  
35 specific groups and re-worded in PICO format (Population, Intervention,  
36 Comparison, Outcome). Searches were then undertaken to ascertain whether or not  
37 each uncertainty could be answered by an up-to-date systematic review. All  
38 unanswered uncertainties were then allocated to one of 12 eye disease categories,  
39 with duplicates removed and similar questions combined. Checks were also made to  
40 identify any on-going trials which might address the uncertainty. The 12 categories  
41 were formed following discussions by the steering group on the most logical and  
42 pragmatic way to organise the data within the time and resources available.  
43  
44  
45  
46  
47  
48  
49  
50  
51

### 52 ***Interim prioritisation***

53  
54 In order to start reducing the number of uncertainties, an interim prioritisation  
55 exercise was conducted over email and by post. Patients, carers and eye health  
56  
57  
58  
59  
60

professionals were invited to examine the long lists and then choose and rank 10 of the uncertainties.

### ***Final prioritisation***

The remaining uncertainties were ranked by patients, carers, relatives, organisation representatives and eye health professionals in one-day workshops facilitated by the JLA, using Nominal Group Technique – a mix of discussion and ranking. For each category, the top 10/11 questions were agreed.

## **Results**

### ***Main survey***

In response to the survey, 2220 people generated 4461 submissions. Of these respondents, 17% identified themselves as healthcare professionals including primarily ophthalmologists, optometrists, orthoptists, ophthalmic nurses, opticians and people working in social care and rehabilitation (figure 2). Over 60% were people with sight loss or an eye condition. The average age of survey participants was 65.7 years old (range:16 months (proxy completion of survey by adult carer)to 105 years). Just under two thirds (62%) of respondents were female. The geographical split was: England 89%; Scotland 6%; Wales 4%; Northern Ireland 1%.

### ***Data analysis***

Following data analysis to remove duplicate/answered/out of scope uncertainties, 686 uncertainties remained. These were divided into twelve eye disease categories. Table 1 shows each category with the initial number of submissions received after the survey responses were submitted, the number of uncertainties sent to interim prioritisation, the number of participants at interim prioritisation and the number of uncertainties considered at the final prioritisation workshops.

### ***Interim prioritisation***

Respondents from the initial survey, organisations and eye healthcare professionals with expertise in the eye diseases in ten categories were contacted to provide interim priority rankings. The smaller number of questions asked in the categories relating to

1  
2  
3 cataract and ocular cancer meant that an interim prioritisation exercise was not  
4 required for either category. A large response was received for the interim exercise,  
5 with input from 446 patients, carers and relatives plus 218 eye health professionals.  
6  
7  
8  
9  
10  
11  
12  
13  
14  
15  
16  
17  
18  
19  
20  
21  
22  
23  
24  
25  
26  
27  
28  
29  
30  
31  
32  
33  
34  
35  
36  
37  
38  
39  
40  
41  
42  
43  
44  
45  
46  
47  
48  
49  
50  
51  
52  
53  
54  
55  
56  
57  
58  
59  
60

Uncertainties accumulated scores based on rank and frequency, resulting in short lists of around 30 uncertainties per category which were taken to final workshops.

### ***Final prioritisation***

In April and May 2013, 12 final prioritisation workshops were held: one for each eye disease category. Balanced numbers of patients/carers/relatives and eye health professionals participated. In total, 155 participants attended across all 12 workshops: 78 patients and 77 clinicians (table 2). The topics debated at each workshop comprised between 19-31 questions per category. Overall 153 questions about sight loss and vision were considered resulting in lists of 10/11 priorities for each of the 12 categories (table 3). The questions addressed the broad topics of aetiology, prevention, identification and interventions with the number 1 questions as follows:

#### ***Age-related macular degeneration***

1. Can a treatment to stop dry AMD progressing and/or developing into the wet form be devised?

#### ***Cataract***

1. How can cataracts be prevented from developing?

#### ***Childhood-onset disorders***

1. How can cerebral visual impairment be identified, prevented and treated in children?

#### ***Corneal and external diseases***

1. Can new therapies such as gene or stem cell treatments be developed for corneal diseases?

#### ***Glaucoma***

1. What are the most effective treatments for glaucoma and how can treatment be improved?

#### ***Inherited retinal diseases***

1. Can a treatment to slow down progression or reverse sight loss in inherited retinal diseases be developed?

### ***Neuro-ophthalmology***

1. What is the underlying cause of optic nerve damage in optic neuropathies, such as anterior ischaemic optic neuropathy, Leber's hereditary optic neuropathy, optic neuritis and other optic neuropathies?

### ***Ocular cancer***

1. What can be done to help ocular cancer sufferers?

### ***Ocular inflammatory diseases***

1. What are the most effective treatments for ocular and orbital inflammatory diseases?

### ***Refractive error and ocular motility***

1. What factors influence the development of refractive error (myopia, astigmatism, presbyopia and long-sightedness)?

### ***Retinal vascular diseases***

1. What are the best methods to prevent retinopathy of prematurity?

### ***Vitreoretinal and ocular trauma***

1. How can surgical techniques be improved to save sight for eyes damaged by injury?

## **Discussion**

About 50% of sight loss in the UK is currently avoidable<sup>1</sup>. Recognising this and the UK's pre-eminent position in eye research, the Vision 2020UK ERG considered that any UK Research Agenda must look at addressing unavoidable sight loss for it to be credible. The challenge was to produce a coherently constructed and constituted prioritised research agenda whose methods were clear and for which there had been inclusive and widespread consultation, where everyone with an interest had been offered the opportunity to contribute and be heard. **As a result of this priority setting partnership we have established top ten lists of research questions for a range of eye conditions.**



1  
2  
3 There are a number of strengths to this study. The SLV-PSP is unique because it  
4 sought the combined views of patients, carers and eye health professionals to  
5 identify uncertainties about the prevention, diagnosis and treatment of sight loss and  
6 eye conditions and prioritise them for research to address<sup>5</sup>. It is rare that those with  
7 direct experience of conditions are able to influence the research agenda<sup>3,5,6</sup>. The  
8 views of patients, carers and professionals were given equal merit. All submitted  
9 questions were evaluated independently and equally. Duplicate questions and out of  
10 scope questions were removed. We did not encounter particularly  
11 misunderstandings between lay persons and professionals or insufficient knowledge  
12 of the public. Open discussions occurred during the face-to-face workshops with  
13 good communication and facilitation to encourage respectful listening in accordance  
14 with James Lind Alliance guidelines. Questions could only be pooled if this was  
15 agreed by patients, carers and professionals. Where there was no agreement, the  
16 questions remained separate. Thus, any differing perspectives of priorities between  
17 participants were acknowledged. We did not aim to compare and contrast questions  
18 from patients, carers and professionals but to represent and act on all.

19  
20 This SLV-PSP provided an extensive set of unanswered questions prioritised by  
21 patients, carers and eye health professionals across twelve categories of eye  
22 conditions. These questions addressed a broad range of eye conditions and  
23 considered issues of aetiology, prevention, screening, assessment and  
24 management. Importantly, the public were as likely to propose questions in relation  
25 to aetiology, assessment and management just as professionals were as likely to  
26 raise questions regarding impact of sight loss.

27  
28 In addition to the strengths of our study, we identified a number of limitations. We did  
29 not request the views of 'pure' researchers (i.e. scientists with no current clinical  
30 practice) as these individuals are intentionally excluded from the priority setting  
31 process by the James Lind Alliance. This step is a key feature of the James Lind  
32 Alliance methodology in which the remit is to provide an opportunity for patients,  
33 carers and clinicians to influence the research agenda. We acknowledge this is a  
34 different approach but do not consider their exclusion as a flaw in this process as we  
35 include clinical researchers who did take part alongside clinicians and the public.  
36  
37  
38  
39  
40  
41  
42  
43  
44  
45  
46  
47  
48  
49  
50  
51  
52  
53  
54  
55  
56  
57  
58  
59  
60

1  
2  
3 These questions may now be used to encourage researchers to investigate what is  
4 most important to these groups. We do not know how our research questions  
5 compare to the prioritisation of research areas by scientists, government agencies or  
6 other organisation research funders. We are unaware of any systematic data  
7 collating such data. However, similar to other PSP processes, we have provided  
8 information on our research priorities openly to national funding organisations and it  
9 is envisaged that research funders will be able to use the list to inform commissioned  
10 calls for research and identify which research applications to response mode funding  
11 opportunities can answer questions that these groups have agreed are a priority.  
12 Furthermore, any questions or uncertainties not prioritised in this process were  
13 submitted to and are currently available on the UK Database of Uncertainties about  
14 the Effects of Treatments (UK DUETs). Thus individuals looking for uncertainties for  
15 their research can access such information direct from UK DUETs. This sharing of  
16 information contributes to the quality assurance process of avoiding waste in  
17 research.  
18  
19  
20  
21  
22  
23  
24  
25  
26  
27

28  
29 The SLV-PSP will also help to increase awareness of why research into sight loss  
30 and vision is necessary and important. It will be used to campaign for major funders  
31 to invest in sight loss and eye conditions, all of which are placing increased  
32 emphasis on researchers demonstrating how they have consulted and involved the  
33 public and patients in the process of developing their research.  
34  
35  
36

37  
38 These remain significant goals. For a sector with around 700 organisations to arrive  
39 at any kind of consensus for research priority areas, a process that was genuinely  
40 consultative, open and engaging to the individuals whose interests these  
41 organisations represent as well as at an organisational level was recognised as  
42 being critical. For a prioritisation exercise to be useful to the sector it needed to  
43 make sense to funders and statutory bodies with responsibilities and interests in  
44 these areas as well as to researchers. It was recognised that a prioritisation of  
45 research areas produced by a small group within the sector would not be credible  
46 and would never engage the support required for it to achieve the goals listed above.  
47  
48  
49  
50  
51  
52  
53  
54

## 55 56 **Conclusions** 57 58 59 60

1  
2  
3 Following a systematic process of national consultation and widespread survey of  
4 patients, carers and clinicians, 2220 individuals generated 4461 questions. Through  
5 a process of data analysis, interim prioritisation and final workshops, a top ten or  
6 eleven research questions have been identified for twelve categories of eye  
7 conditions. This is the first time, to our knowledge, that an exercise like this has been  
8 carried out anywhere in the world for sight loss and vision. Not only is this the most  
9 wide ranging and ambitious James Lind Alliance priority setting partnership, it also  
10 engaged a diversity of participants and enabled them to reach consensus together.  
11 For the first time, we have a clear idea of what the consumers of eye research – the  
12 patients and the people who care for and treat them – believe research money  
13 should be spent on. It has provided a focus for research in sight loss and vision and  
14 it is intended that these priorities are used to inform funders, researchers, clinicians  
15 and the public.  
16  
17  
18  
19  
20  
21  
22  
23  
24  
25  
26  
27

### 28 **Figure legends**

29  
30 Figure 1: Flowchart showing the steps of the process from Stage 1 when  
31 establishing the PSP through to Stage 5 at the final prioritisation.  
32  
33

34 Figure 2: Background of respondents showing that questions were largely received  
35 from people who have sight loss or an eye condition, but also including eye health  
36 professions, organisations, parents, family and carers.  
37  
38  
39  
40  
41  
42

### 43 **References**

- 44  
45 1. Access Economics (2009) Future Sight Loss UK 1: The economic impact of  
46 partial sight and blindness in the UK adult population, RNIB  
47  
48 2. <http://www.vision2020uk.org.uk/>  
49  
50 3. Chalmers, I. and Glasziou, P. (2009) 'Avoidable waste in the production and  
51 reporting of research evidence', *The Lancet*, Vol. 374, pp. 86–89.  
52  
53 4. Sight loss and vision priority setting partnership. Setting priorities for eye  
54 research. (2013) Final report. [www.sightlosspsp.org.uk](http://www.sightlosspsp.org.uk)  
55  
56  
57  
58  
59  
60

- 1
  - 2
  - 3
  - 4
  - 5
  - 6
  - 7
  - 8
  - 9
  - 10
  - 11
  - 12
  - 13
  - 14
  - 15
  - 16
  - 17
  - 18
  - 19
  - 20
  - 21
  - 22
  - 23
  - 24
  - 25
  - 26
  - 27
  - 28
  - 29
  - 30
  - 31
  - 32
  - 33
  - 34
  - 35
  - 36
  - 37
  - 38
  - 39
  - 40
  - 41
  - 42
  - 43
  - 44
  - 45
  - 46
  - 47
  - 48
  - 49
  - 50
  - 51
  - 52
  - 53
  - 54
  - 55
  - 56
  - 57
  - 58
  - 59
  - 60
5. Stewart, R. and Oliver, S. (2008) *A systematic map of studies of patients' and clinicians' research priorities*. London: James Lind Alliance.
6. Caron-Flinterman J, et al. (2006) Patients priorities concerning health research: the case of asthma and COPD research in the Netherlands. *Health Expectations*, 8, pp253–263.

For peer review only

Table 1 Categories of eye condition

|                                         | Initial number of survey questions | Number of questions at interim prioritisation | Number of participants at interim prioritisation | Number of questions at final prioritisation |
|-----------------------------------------|------------------------------------|-----------------------------------------------|--------------------------------------------------|---------------------------------------------|
| <b>Age-related macular degeneration</b> | 763                                | 43                                            | 101 PPI<br>25 Professionals                      | 29                                          |
| <b>Cataract</b>                         | 191                                | 27                                            | Not required                                     | 27                                          |
| <b>Childhood-onset disorders</b>        | 125                                | 69                                            | 12 PPI<br>20 Professionals                       | 30                                          |
| <b>Corneal and external diseases</b>    | 292                                | 93                                            | 25 PPI<br>38 Professionals                       | 30                                          |
| <b>Glaucoma</b>                         | 1235                               | 78                                            | 182 PPI<br>25 Professionals                      | 30                                          |
| <b>Inherited retinal diseases</b>       | 280                                | 63                                            | 27 PPI<br>25 Professionals                       | 30                                          |
| <b>Neuro-ophthalmology</b>              | 125                                | 43                                            | 15 PPI<br>21 Professionals                       | 30                                          |
| <b>Ocular cancer</b>                    | 26                                 | 19                                            | Not required                                     | 19                                          |
| <b>Ocular inflammatory diseases</b>     | 472                                | 66                                            | 27 PPI<br>21 Professionals                       | 30                                          |

|                                             |     |    |                            |    |
|---------------------------------------------|-----|----|----------------------------|----|
| <b>Refractive error and ocular motility</b> | 188 | 70 | 21 PPI<br>23 Professionals | 31 |
| <b>Retinal vascular diseases</b>            | 205 | 56 | 15 PPI<br>12 Professionals | 30 |
| <b>Vitreoretinal and ocular trauma</b>      | 265 | 59 | 21 PPI<br>8 Professionals  | 30 |

PPI: Inclusive of patients, carers, relatives, organisation representatives.

Professionals: Inclusive of eye health professions.

**Table 2** Final workshop participants

| Category                             | Total number of workshop participants | Number of patients, relatives, carers, patient groups and organisations | Number of eye health professionals |
|--------------------------------------|---------------------------------------|-------------------------------------------------------------------------|------------------------------------|
| Age-related Macular Degeneration     | 17                                    | 9                                                                       | 8                                  |
| Cataract                             | 11                                    | 5                                                                       | 6                                  |
| Childhood-Onset Disorders            | 16                                    | 7                                                                       | 9                                  |
| Corneal and External Diseases        | 12                                    | 5                                                                       | 7                                  |
| Glaucoma                             | 17                                    | 9                                                                       | 8                                  |
| Inherited Retinal Diseases           | 19                                    | 11                                                                      | 8                                  |
| Neuro-ophthalmology                  | 10                                    | 6                                                                       | 4                                  |
| Ocular Cancer                        | 10                                    | 6                                                                       | 4                                  |
| Ocular Inflammatory Diseases         | 10                                    | 5                                                                       | 5                                  |
| Refractive Error and Ocular Motility | 12                                    | 5                                                                       | 7                                  |
| Retinal Vascular Diseases            | 11                                    | 3                                                                       | 8                                  |
| Vitreoretinal and Ocular Trauma      | 10                                    | 7                                                                       | 3                                  |
| <b>TOTAL</b>                         | <b>155</b>                            | <b>78</b>                                                               | <b>77</b>                          |

**Table 3** Top ten lists per category

|    | <b>Age-related macular degeneration</b>                                                                                            | <b>Cataract</b>                                                                                                                                | <b>Childhood-onset disorders</b>                                                                                                                              | <b>Corneal and external diseases</b>                                                                    | <b>Glaucoma</b>                                                                                           | <b>Inherited retinal diseases</b>                                                                                                                                           |
|----|------------------------------------------------------------------------------------------------------------------------------------|------------------------------------------------------------------------------------------------------------------------------------------------|---------------------------------------------------------------------------------------------------------------------------------------------------------------|---------------------------------------------------------------------------------------------------------|-----------------------------------------------------------------------------------------------------------|-----------------------------------------------------------------------------------------------------------------------------------------------------------------------------|
| 1  | Can a treatment to stop dry AMD progressing and/or developing into the wet form be devised?                                        | How can cataracts be prevented from developing?                                                                                                | How can cerebral visual impairment be identified, prevented and treated in children?                                                                          | Can new therapies such as gene or stem cell treatments be developed for corneal diseases?               | What are the most effective treatments for glaucoma and how can treatment be improved?                    | Can a treatment to slow down progression or reverse sight loss in inherited retinal diseases be developed?                                                                  |
| 2  | What is the cause of AMD?                                                                                                          | Can the return of cloudy or blurred vision after cataract surgery known as posterior capsule opacity (PCO) or secondary cataract be prevented? | How can treatment for visual pathway damage associated with pre-term birth be developed?                                                                      | What is the most effective management for dry eye and can new strategies be developed?                  | How can loss of vision be restored for people with glaucoma?                                              | How can sight loss be prevented in an individual with inherited retinal disease?                                                                                            |
| 3  | How can AMD be prevented?                                                                                                          | How can cataract progression be slowed down?                                                                                                   | How do we improve screening and surveillance from the ante-natal period through to childhood to ensure early diagnosis of impaired vision and eye conditions? | Can treatments to save eye sight from microbial keratitis be improved?                                  | How can glaucoma be stopped from progressing?                                                             | Is a genetic (molecular) diagnosis possible for all inherited retinal diseases?                                                                                             |
| 4  | Are there ways of restoring sight loss for people with AMD?                                                                        | What alternatives to treat cataracts other than cataract surgery are being developed?                                                          | Can the treatment of amblyopia be improved to produce better short and long term outcomes than are possible with current treatments?                          | How can the rejection of corneal transplants be prevented?                                              | What can be done to improve early diagnosis of sight-threatening glaucoma?                                | What factors affect the progression of sight loss in inherited retinal diseases?                                                                                            |
| 5  | Can the development of AMD be predicted?                                                                                           | What is the cause of cataract?                                                                                                                 | How can cataract be prevented in children?                                                                                                                    | Can the outcomes of corneal transplantation be improved?                                                | What causes glaucoma?                                                                                     | What causes sight loss in inherited retinal diseases?                                                                                                                       |
| 6  | What is the most effective way to detect and monitor the progression of early AMD?                                                 | How can cataract surgery outcomes be improved?                                                                                                 | What are the causes of coloboma and microphthalmia/anophthalmia and how can they be prevented?                                                                | What causes keratoconus to progress and can progression be prevented?                                   | What is the most effective way of monitoring the progression of glaucoma?                                 | What is the most effective way to support patients with inherited retinal disease?                                                                                          |
| 7  | What factors influence the progression of AMD?                                                                                     | How safe and effective is laser assisted cataract surgery?                                                                                     | Can vision be corrected in later life for people with amblyopia?                                                                                              | Can non-surgical therapy be developed for Fuchs' corneal dystrophy?                                     | How can glaucoma patients with a higher risk to progress rapidly be detected?                             | Can the diagnosis of inherited retinal diseases be refined so that individuals can be given a clearer idea about their specific condition and how it is likely to progress? |
| 8  | Can a non-invasive therapy be developed for wet AMD?                                                                               | Should accommodative lenses be developed for cataract surgery?                                                                                 | How can retinoblastoma be identified, prevented and treated in children?                                                                                      | Can corneal infections be prevented in high-risk individuals such as contact lens wearers?              | Why is glaucoma more aggressive in people of certain ethnic groups, such as those of West African origin? | What is the relationship between sight loss and mental health for people with inherited retinal diseases?                                                                   |
| 9  | Can dietary factors, nutritional supplements, complementary therapies or lifestyle changes prevent or slow the progression of AMD? | What is the best measure of visual disability due to cataract?                                                                                 | Can better treatments for glaucoma in children be developed?                                                                                                  | What is the cause of keratoconus and can it be prevented?                                               | How can glaucoma be prevented?                                                                            | Would having a treatment for an inherited retinal disease preclude a patient from having another treatment?                                                                 |
| 10 | What are the best enablement strategies for people with AMD?                                                                       | Can retinal detachment be prevented after cataract surgery?                                                                                    | Can a treatment be developed to improve vision for people with albinism?                                                                                      | What is the most effective management of ocular complications associated with Stevens Johnson Syndrome? | Is there a link between treatment adherence and glaucoma progression and how can adherence be improved?   | With regard to inherited retinal diseases what is the role of pre-natal and pre-implantation diagnosis in helping parents make informed choices?                            |
| 11 |                                                                                                                                    | What are the outcomes for cataract surgery among people with different levels of cognitive                                                     |                                                                                                                                                               | Can severe ocular surface disease in children, such as blepharokeratoconjunctivitis and                 |                                                                                                           |                                                                                                                                                                             |



|   |                                                                                                                                                                                                                         | impairment (all causes excluding dementia, stroke, neurological conditions, head injuries)?                        |                                                                                            | vernal keratoconjunctivitis be managed better?                                                                                                                                                    |                                                                                                                      |                                                                                                           |
|---|-------------------------------------------------------------------------------------------------------------------------------------------------------------------------------------------------------------------------|--------------------------------------------------------------------------------------------------------------------|--------------------------------------------------------------------------------------------|---------------------------------------------------------------------------------------------------------------------------------------------------------------------------------------------------|----------------------------------------------------------------------------------------------------------------------|-----------------------------------------------------------------------------------------------------------|
|   | <b>Neuro-ophthalmology</b>                                                                                                                                                                                              | <b>Ocular cancer</b>                                                                                               | <b>Ocular inflammatory diseases</b>                                                        | <b>Refractive error and ocular motility</b>                                                                                                                                                       | <b>Retinal vascular diseases</b>                                                                                     | <b>Vitreoretinal and ocular trauma</b>                                                                    |
| 1 | What is the underlying cause of optic nerve damage in optic neuropathies, such as anterior ischaemic optic neuropathy, Leber's hereditary optic neuropathy, optic neuritis and other optic neuropathies?                | What can be done to help ocular cancer sufferers?                                                                  | What are the most effective treatments for ocular and orbital inflammatory diseases?       | What factors influence the development of refractive error (myopia, astigmatism, presbyopia and long-sightedness)?                                                                                | What are the best methods to prevent retinopathy of prematurity?                                                     | How can surgical techniques be improved to save sight for eyes damaged by injury?                         |
| 2 | What are the most effective treatments and rehabilitation for optic neuropathies, e.g. Leber's hereditary optic neuropathy and anterior ischaemic optic neuropathy?                                                     | Can gene-based targeted therapies for ocular cancers be developed?                                                 | What causes thyroid eye disease?                                                           | What is the cause of both congenital and acquired nystagmus?                                                                                                                                      | How can sight loss from diabetic retinal changes be prevented and reduced?                                           | How can the risk of losing sight for people with retinal detachment be reduced?                           |
| 3 | Can vision loss due to optic nerve diseases such as giant cell arteritis, Leber's hereditary optic neuropathy, optic neuritis and optic atrophy, be restored, for example through gene therapy and stem cell treatment? | How can immunotherapy be used to fight metastatic ocular melanoma?                                                 | Can the severity of ocular and orbital inflammatory disease in an individual be predicted? | How can the development of binocular vision in young children with squint and amblyopia be promoted, and would the same approach work in older individuals without inducing intractable diplopia? | What are the predictive factors for the progression to sight threatening diabetic eye disease?                       | How can better interventions be developed that are effective in treating vitreous opacities/eye floaters? |
| 4 | What rehabilitation or treatment methods are most effective for vision loss following brain damage due to stroke, brain injury, cerebral vision impairment, tumours and dementias?                                      | What are the most effective detection and screening methods for follow up to detect metastasis of ocular melanoma? | Is it possible to prevent further occurrences of retinal damage caused by toxoplasmosis?   | Would correction of refractive error have a positive impact on early life learning and development?                                                                                               | Is there a way to improve screening of premature babies for retinopathy of prematurity?                              | What causes retinal detachment and can it be prevented?                                                   |
| 5 | What is the most effective way to assess vision in patients with neurological visual impairment i.e. stroke, dementia and cerebral/cortical visual impairment?                                                          | How can follow-up for ocular complications be managed in patients with ocular melanoma?                            | What causes birdshot retinopathy?                                                          | Does early diagnosis of refractive error improve long-term prognosis and promote faster, more effective treatment?                                                                                | Can an effective long lasting treatment for diabetic macular oedema, both ischaemic and non-ischaemic, be developed? | Can more effective diagnostic tools be developed for assessing the vitreous and eye floaters?             |
| 6 | Can the early stages of optic neuropathy be detected?                                                                                                                                                                   | What is the best management of metastatic choroidal melanoma?                                                      | Why does disease burn out in patients with ocular and orbital inflammatory diseases?       | What is the effect of congenital nystagmus on visual and emotional development?                                                                                                                   | Can a retinal vein occlusion be predicted and prevented?                                                             | Can a functioning prosthetic eye be developed to replace an eye damaged by injury?                        |
| 7 | How can optic neuropathies be prevented, for example anterior ischaemic optic neuropathy, Leber's hereditary optic neuropathy, optic neuritis and other optic neuropathies?                                             | What activates choroidal melanoma metastasis in the liver after the primary melanoma has been treated?             | Can early detection methods be developed for ocular and orbital inflammatory diseases?     | What is the most effective treatment for exotropia and when should it be delivered?                                                                                                               | Can new non-invasive treatments be developed to slow down the progression of diabetic retinopathy?                   | How can epiretinal membrane/fibrosis be prevented or treated?                                             |
| 8 | Can treatments be developed for visual field and ocular                                                                                                                                                                 | Can adjuvant therapies be developed to treat ocular                                                                | What medications best prevent the development of eye disease in                            | How can the functional effects of surgical treatment for squint best                                                                                                                              | What are the barriers that prevent diabetic patients                                                                 | Can stem cells be used to regrow an eye or part of an eye?                                                |

1  
2  
3  
4  
5  
6  
7  
8  
9  
10  
11  
12  
13  
14  
15  
16  
17  
18  
19  
20  
21  
22  
23  
24  
25  
26  
27  
28  
29  
30  
31  
32  
33  
34  
35  
36  
37  
38  
39  
40  
41  
42  
43  
44  
45  
46  
47  
48  
49

|    |                                                                                                                                       |                                                                                  |                                                                |                                                                                                                                                |                                                                                                                                     |                                                                          |
|----|---------------------------------------------------------------------------------------------------------------------------------------|----------------------------------------------------------------------------------|----------------------------------------------------------------|------------------------------------------------------------------------------------------------------------------------------------------------|-------------------------------------------------------------------------------------------------------------------------------------|--------------------------------------------------------------------------|
| 9  | motility manifestations following stroke?<br>How can electronic devices improve or restore vision for people with optic neuropathies? | melanoma?<br>What are the causes of ocular cancer and how can they be prevented? | Behcets?<br>What causes scleritis?                             | be assessed?<br>Could the accurate testing of refractive error be made less dependent on a subjective response i.e. the person's own response? | having regular eye checks?<br>What rehabilitation programmes are best for the management of distorted vision from retinal diseases? | What causes posterior vitreous detachment/vitreous syneresis?            |
| 10 | Can an alternative or new treatment be developed that will treat the sight loss caused by giant cell arteritis?                       | What is the most effective treatment for primary ocular melanoma?                | Can diet or lifestyle changes prevent uveitis from developing? | How can myopia be prevented?                                                                                                                   | What is the efficacy and safety of anti-VEGF agents in the treatment of retinopathy of prematurity?                                 | Are there methods to prevent and improve the treatment of macular holes? |

Figure 1 Flowchart of SLVPSP process

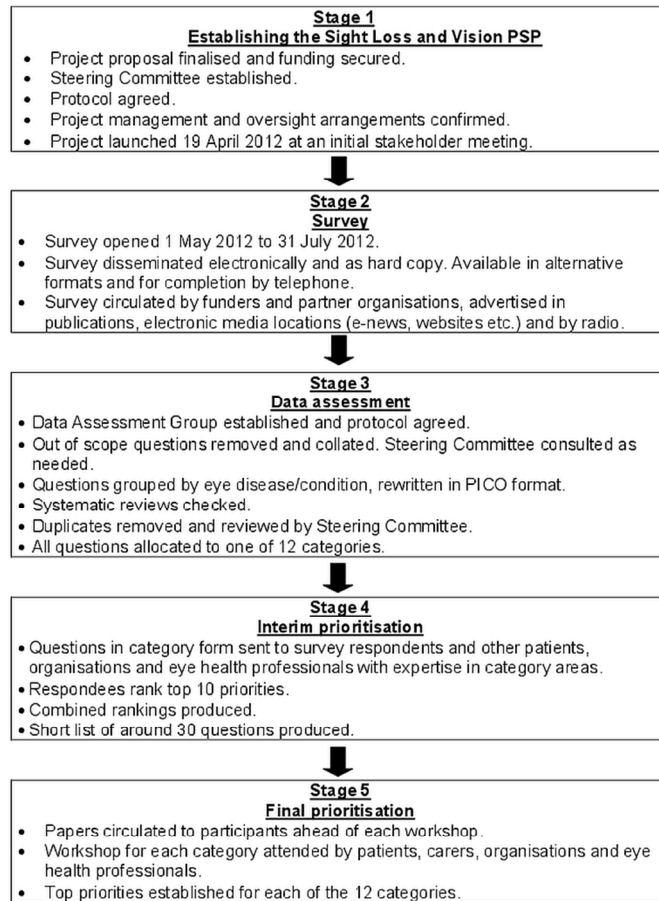

90x116mm (300 x 300 DPI)

1  
2  
3  
4  
5  
6  
7  
8  
9  
10  
11  
12  
13  
14  
15  
16  
17  
18  
19  
20  
21  
22  
23  
24  
25  
26  
27  
28  
29  
30  
31  
32  
33  
34  
35  
36  
37  
38  
39  
40  
41  
42  
43  
44  
45  
46  
47  
48  
49  
50  
51  
52  
53  
54  
55  
56  
57  
58  
59  
60

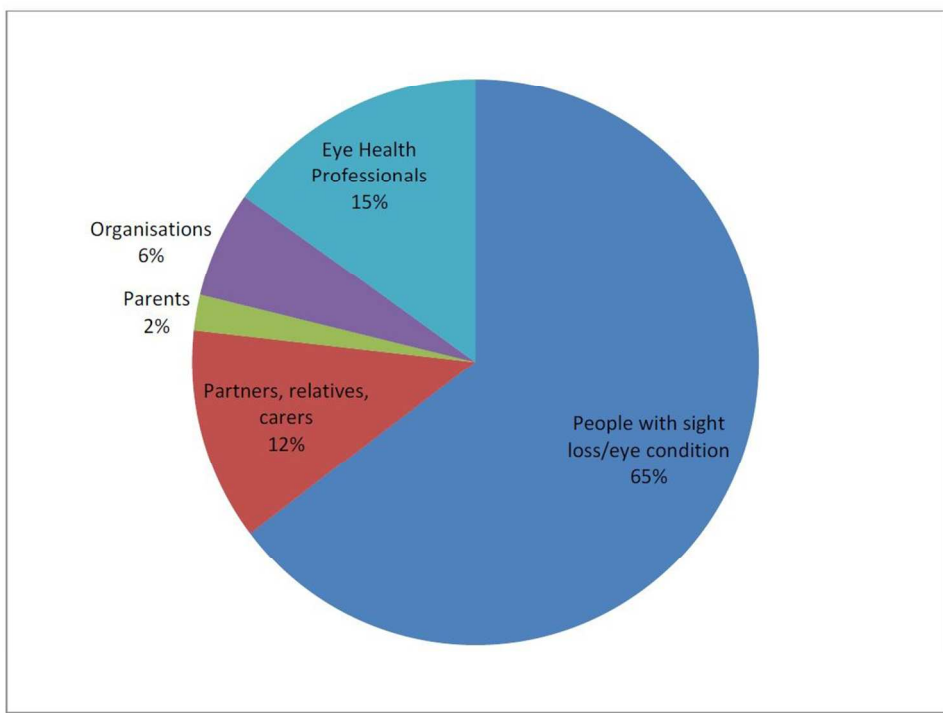

313x236mm (96 x 96 DPI)

Review only

# BMJ Open

## The Sight Loss and Vision Priority Setting Partnership (SLV-PSP): Overview and results of the research prioritisation survey process.

|                                 |                                                                                                                                                                                                                                                                                                                                                                                                                                                                                                                                                                                                                                                                                                                                                                                                                                                                                                                                                                                                                                                                                                                                                                                                                                                                                                                                                                                                                                                                                                                                                                                                                                                                               |
|---------------------------------|-------------------------------------------------------------------------------------------------------------------------------------------------------------------------------------------------------------------------------------------------------------------------------------------------------------------------------------------------------------------------------------------------------------------------------------------------------------------------------------------------------------------------------------------------------------------------------------------------------------------------------------------------------------------------------------------------------------------------------------------------------------------------------------------------------------------------------------------------------------------------------------------------------------------------------------------------------------------------------------------------------------------------------------------------------------------------------------------------------------------------------------------------------------------------------------------------------------------------------------------------------------------------------------------------------------------------------------------------------------------------------------------------------------------------------------------------------------------------------------------------------------------------------------------------------------------------------------------------------------------------------------------------------------------------------|
| Journal:                        | <i>BMJ Open</i>                                                                                                                                                                                                                                                                                                                                                                                                                                                                                                                                                                                                                                                                                                                                                                                                                                                                                                                                                                                                                                                                                                                                                                                                                                                                                                                                                                                                                                                                                                                                                                                                                                                               |
| Manuscript ID:                  | bmjopen-2014-004905.R2                                                                                                                                                                                                                                                                                                                                                                                                                                                                                                                                                                                                                                                                                                                                                                                                                                                                                                                                                                                                                                                                                                                                                                                                                                                                                                                                                                                                                                                                                                                                                                                                                                                        |
| Article Type:                   | Research                                                                                                                                                                                                                                                                                                                                                                                                                                                                                                                                                                                                                                                                                                                                                                                                                                                                                                                                                                                                                                                                                                                                                                                                                                                                                                                                                                                                                                                                                                                                                                                                                                                                      |
| Date Submitted by the Author:   | 30-Jun-2014                                                                                                                                                                                                                                                                                                                                                                                                                                                                                                                                                                                                                                                                                                                                                                                                                                                                                                                                                                                                                                                                                                                                                                                                                                                                                                                                                                                                                                                                                                                                                                                                                                                                   |
| Complete List of Authors:       | Rowe, Fiona; University of Liverpool, Health Services Research<br>Wormald, Richard; The Cochrane Eyes and Vision Group, London School of Hygiene and Tropical Medicine, Eyes and Vision; Moorfields Eye Hospital NHS Foundation Trust, Ophthalmology<br>Cable, Richard; Fight for Sight,<br>Acton, Michele; Fight for Sight,<br>Bonstein, Karen; Institute of Ophthalmology, NIHR Moorfields Biomedical Research Centre for Ophthalmology<br>Bowen, Michael; College of Optometry,<br>Bronze, Carol; Patient representative,<br>Bunce, Catey; Moorfields Eye Hospital NHS Foundation Trust, Ophthalmology; Institute of Ophthalmology, NIHR Moorfields Biomedical Research Centre for Ophthalmology<br>Conroy, Dolores; Fight for Sight,<br>Cowan, Katherine; James Lind Alliance (JLA) –National Institute for Health Research,<br>Evans, Kathy; Royal College of Ophthalmology,<br>Fenton, Mark; UK DUETs (NICE Evidence – UK Database of Uncertainties about the Effects of Treatments),<br>Giles, Heather; Patient representative,<br>Gordon, Iris; The Cochrane Eyes and Vision Group, London School of Hygiene and Tropical Medicine, Eyes and Vision<br>Halfhide, Louise; Institute of Ophthalmology, NIHR Moorfields Biomedical Research Centre for Ophthalmology<br>Harper, Robert; Manchester Royal Eye Hospital, Department of Optometry<br>Lightstone, Anita; VISION 2020 UK, UK Vision Strategy<br>Votruba, Marcela; Cardiff University, Department of Ophthalmology<br>Waterman, Heather; University of Manchester, Department of Nursing<br>Zekite, Antra; The Cochrane Eyes and Vision Group, London School of Hygiene and Tropical Medicine, Eyes and Vision |
| <b>Primary Subject Heading</b>: | Ophthalmology                                                                                                                                                                                                                                                                                                                                                                                                                                                                                                                                                                                                                                                                                                                                                                                                                                                                                                                                                                                                                                                                                                                                                                                                                                                                                                                                                                                                                                                                                                                                                                                                                                                                 |
| Secondary Subject Heading:      | Ophthalmology, Qualitative research                                                                                                                                                                                                                                                                                                                                                                                                                                                                                                                                                                                                                                                                                                                                                                                                                                                                                                                                                                                                                                                                                                                                                                                                                                                                                                                                                                                                                                                                                                                                                                                                                                           |
| Keywords:                       | Sight loss, Vision, Research, Priorities, Partnership, James Lind Alliance                                                                                                                                                                                                                                                                                                                                                                                                                                                                                                                                                                                                                                                                                                                                                                                                                                                                                                                                                                                                                                                                                                                                                                                                                                                                                                                                                                                                                                                                                                                                                                                                    |
|                                 |                                                                                                                                                                                                                                                                                                                                                                                                                                                                                                                                                                                                                                                                                                                                                                                                                                                                                                                                                                                                                                                                                                                                                                                                                                                                                                                                                                                                                                                                                                                                                                                                                                                                               |

1  
2  
3  
4  
5  
6  
7  
8  
9  
10  
11  
12  
13  
14  
15  
16  
17  
18  
19  
20  
21  
22  
23  
24  
25  
26  
27  
28  
29  
30  
31  
32  
33  
34  
35  
36  
37  
38  
39  
40  
41  
42  
43  
44  
45  
46  
47  
48  
49  
50  
51  
52  
53  
54  
55  
56  
57  
58  
59  
60

SCHOLARONE™  
Manuscripts

For peer review only

**The Sight Loss and Vision Priority Setting Partnership (SLV-PSP): Overview and results of the research prioritisation survey process.**

Fiona Rowe<sup>1</sup>, Richard Wormald<sup>2,3</sup>, Richard Cable<sup>4</sup>, Michele Acton<sup>4</sup>, Karen Bonstein<sup>5</sup>, Michael Bowen<sup>6</sup>, Carol Bronze<sup>7</sup>, Catey Bunce<sup>2,3,5</sup>, Dolores Conroy<sup>4</sup>, Katherine Cowan<sup>8</sup>, Kathy Evans<sup>9</sup>, Mark Fenton<sup>10</sup>, Heather Giles<sup>7</sup>, Iris Gordon<sup>3</sup>, Louise Halfhide<sup>5</sup>, Robert Harper<sup>11</sup>, Anita Lightstone<sup>12</sup>, Marcela Votruba<sup>13</sup>, Heather Waterman<sup>14</sup>, Antra Zekite<sup>2</sup>

1. British and Irish Orthoptic Society, London, UK
2. Department of Ophthalmology, Moorfields Eye Hospital NHS Foundation Trust, London, UK
3. The Cochrane Eyes and Vision Group, London School of Hygiene and Tropical Medicine, London, UK
4. Fight for Sight, London, UK
5. NIHR Biomedical Research Centre at Moorfields and UCL Institute of Ophthalmology, London, UK
6. College of Optometrists, London, UK
7. Patient representative
8. The James Lind Alliance (JLA) –National Institute for Health Research, Southampton, UK
9. Royal College of Ophthalmologists, London, UK
10. UK DUETs (NICE Evidence – UK Database of Uncertainties about the Effects of Treatments), London, UK
11. Department of Optometry, Manchester Royal Eye Hospital, Manchester, UK
12. UK Vision Strategy / VISION 2020 UK, London, UK
13. Department of Ophthalmology, Cardiff University, Cardiff, UK
14. Department of Nursing, University of Manchester, Manchester, UK

**Corresponding author:**

Dr Fiona Rowe

Department of Health Services Research,

1  
2  
3 WhelanBuilding (1.10),  
4

5 University of Liverpool,  
6

7 Brownlow Hill,  
8

9  
10 Liverpool L69 3GB  
11

12 T: 0151 7944956  
13

14 E: rowef@liverpool.ac.uk  
15  
16  
17  
18  
19

20 **Word count:** 2573  
21

22 **Number of figures:** 2  
23

24 **Number of tables:** 3  
25  
26

27 **Short title:** Sight Loss and Vision Priority Setting Partnership  
28  
29  
30  
31  
32  
33  
34  
35  
36  
37  
38  
39  
40  
41  
42  
43  
44  
45  
46  
47  
48  
49  
50  
51  
52  
53  
54  
55  
56  
57  
58  
59  
60



## Abstract

Objectives: The Sight Loss and Vision Priority Setting Partnership aimed to identify research priorities relating to sight loss and vision through consultation with patients, carers and clinicians. These priorities can be used to inform funding bodies' decisions and enhance the case for additional research funding.

Design: Prospective survey with support from the James Lind Alliance.

Setting: UK wide NHS and non-NHS.

Participants: Patients, carers and eye health professionals. Academic researchers were excluded solely from the prioritisation process. The survey was disseminated by patient groups, professional bodies, at conferences and through the media, and was available for completion online, by phone, by post and by alternative formats (Braille and audio).

Outcome measure: People were asked to submit the questions about prevention, diagnosis and treatment of sight loss and eye conditions that they most wanted to see answered by research. Returned survey questions were reviewed by a data assessment group. Priorities were established across eye disease categories at final workshops.

Results: 2,220 people responded generating 4,461 submissions. Sixty-five percent of respondents had sight loss and/or an eye condition. Following initial data analysis, 686 submissions remained which were circulated for interim prioritisation (excluding cataract and ocular cancer questions) to 446 patients/carers and 218 professionals. The remaining 346 questions were discussed at final prioritisation workshops to reach agreement of top questions per category.

Conclusions: The exercise engaged a diverse community of stakeholders generating a wide range of conditions and research questions. Top priority questions were established across 12 eye disease categories.

**Keywords:** Sight loss; Vision; Research; Priorities; Partnership; James Lind Alliance

## Article summary

Strengths and limitations of this study:

- Wide ranging and comprehensive coverage
- Substantial response
- The hardest to reach and those with the least opportunity to be heard may indeed have not been heard
- Any such groups now feeling excluded should have an opportunity to redress this.

## Introduction

In the UK it is estimated that almost 2 million people are affected by sight loss and this number is expected to double by 2050<sup>1</sup>. Currently 50% of sight loss in the UK is avoidable but there are also many unavoidable sight loss conditions. Whether it is to address childhood eye conditions or those affecting adults, research is needed to inform us about prevention, to develop new techniques for early diagnosis and to develop new and more effective treatments for many eye conditions.

The Sight Loss and Vision Priority Setting Partnership (SLV-PSP) was developed from earlier work by the Eye Research Group (ERG) of VISION 2020 UK whose mission is the elimination of avoidable sight loss and the amelioration of the effects of sight loss when it cannot be avoided<sup>2</sup>. The UK Vision Strategy sets out ways of addressing avoidable sight loss in the UK. There is much that can be done to improve the nation's eye health, and to eliminate avoidable sight loss. There are however gaps in the evidence base regarding eye health interventions and the best way to deliver services. Research is needed to support the UK Vision Strategy. In key areas research is urgently required to enable the Vision Strategy to be implemented in an evidence-based way that ensures efficient and effective development.

Despite on-going research in the UK and other countries, there are still many questions about the prevention, diagnosis and treatment of sight loss and eye conditions that remain unanswered. Given that resources for research are limited, it is important for research funders to understand how patients, carers and eye health professionals prioritise these unanswered questions so that future research can be consolidated and targeted accordingly<sup>3</sup>.

The purpose of this project was to undertake a comprehensive, UK-wide, survey of patients, carers and clinicians to identify research questions and priorities to inform decisions of funding bodies and enhance the case for additional research funding.

The priority setting process has been well established by the James Lind Alliance (JLA) (<http://www.lindalliance.org/>) which has supported partnerships on a range of topics since 2004. This partnership initiated by Fight for Sight, the UK's leading eye

1  
2  
3 research charity was established with support, financial and in kind, from the College  
4 of Optometrists, the Royal College of Ophthalmologists, the NIHR Moorfields  
5 Biomedical Research Centre, the RNIB, UK Vision Strategy and the Cochrane Eyes  
6 and Vision Group. A representative from the JLA convened meetings of the steering  
7 committee and provided independent chairmanship for this and the priority setting  
8 workshops. Their extensive experience in this process ensured no single voice  
9 exerted undue influence over the prioritisation process and that the views of patients,  
10 their carers and clinicians were paramount. The views of researchers with no clinical  
11 involvement with patients and views of commercial organisations were not included  
12 in the prioritisation.  
13  
14  
15  
16  
17  
18  
19  
20  
21  
22

### 23 **Methods and materials**

24  
25 The detailed methods for this prioritisation process have been described in detail  
26 elsewhere<sup>4</sup>. In brief, the process comprised five stages (figure 1). Our study did not  
27 require ethical approval or consent from participants. James Lind Alliance priority  
28 setting partnerships do not require ethical approval. Dissemination of the survey was  
29 via open communications through professional bodies, charities and related  
30 organisations. The survey was not undertaken through Higher Education Institutes or  
31 through NHS organisations and does not recruit NHS patients. The survey contained  
32 clear information on the aims of the priority setting partnership, how the process  
33 works and how data will be used. In addition, submission of questions was  
34 anonymised. For the workshops in which priorities were discussed and agreed,  
35 participants choose to voluntarily attend and consent was not required for this. We  
36 followed the ethical guidance for participation, information and evaluation from the  
37 James Lind Alliance guidebook ([http://www.jla-guidebook.org/jla-  
38 guidebook.asp?val=56](http://www.jla-guidebook.org/jla-guidebook.asp?val=56)).  
39  
40  
41  
42  
43  
44  
45  
46  
47  
48

### 49 ***Establishing the SLV-PSP***

50  
51  
52 A steering committee and data assessment group comprising the authors of this  
53 article oversaw the process. Each member was responsible for contributing to and  
54 managing a part of the process and was selected for their expertise and association  
55 with eye research. The steering committee also included patient representatives  
56  
57  
58  
59  
60

1  
2  
3 and eye health professionals. In April 2012 an initial stakeholder meeting was held to  
4 engage the groups and organisations with member bases and community influence.  
5 This was to ensure that the initial survey would be disseminated and completed by  
6 as many patients, relatives, carers and eye health professionals as possible in the  
7 UK.  
8  
9  
10

### 11 ***Main survey***

12  
13  
14 The SLV-PSP survey was launched on 1 May 2012 and was open until 31 July 2012.  
15 The aim of the survey was to identify patients', carers' and eye health professionals'  
16 unanswered questions about sight loss and eye conditions. The survey's primary  
17 question was "What question(s) about the prevention, diagnosis and treatment of  
18 sight loss and eye conditions would you like to see answered by research?"  
19  
20  
21  
22

### 23 ***Data analysis***

24  
25  
26 Following closure of the survey, all submissions were examined. Out-of-scope  
27 submissions were removed including those not related to the topic and uncertainties  
28 better suited to social research. In-scope uncertainties were allocated into disease-  
29 specific groups and re-worded in PICO format (Population, Intervention,  
30 Comparison, Outcome). Searches were then undertaken to ascertain whether or not  
31 each uncertainty could be answered by an up-to-date systematic review. All  
32 unanswered uncertainties were then allocated to one of 12 eye disease categories,  
33 with duplicates removed and similar questions combined. Checks were also made to  
34 identify any on-going trials which might address the uncertainty. The 12 categories  
35 were formed following discussions by the steering group on the most logical and  
36 pragmatic way to organise the data within the time and resources available.  
37  
38  
39  
40  
41  
42  
43  
44

### 45 ***Interim prioritisation***

46  
47  
48 In order to start reducing the number of uncertainties, an interim prioritisation  
49 exercise was conducted over email and by post. Patients, carers and eye health  
50 professionals were invited to examine the long lists and then choose and rank 10 of  
51 the uncertainties.  
52  
53  
54

### 55 ***Final prioritisation***

1  
2  
3 The remaining uncertainties were ranked by patients, carers, relatives, organisation  
4 representatives and eye health professionals in one-day workshops facilitated by the  
5 JLA, using Nominal Group Technique – a mix of discussion and ranking. For each  
6 category, the top 10/11 questions were agreed.  
7  
8  
9

## 10 11 12 13 **Results**

### 14 15 ***Main survey***

16  
17 In response to the survey, 2220 people generated 4461 submissions. Of these  
18 respondents, 17% identified themselves as healthcare professionals including  
19 primarily ophthalmologists, optometrists, orthoptists, ophthalmic nurses, opticians  
20 and people working in social care and rehabilitation (figure 2). Over 60% were  
21 people with sight loss or an eye condition. The average age of survey participants  
22 was 65.7 years old (range:16 months (proxy completion of survey by adult carer)to  
23 105 years). Just under two thirds (62%) of respondents were female. The  
24 geographical split was: England 89%; Scotland 6%; Wales 4%; Northern Ireland 1%.  
25  
26  
27  
28  
29  
30  
31

### 32 33 ***Data analysis***

34 Following data analysis to remove duplicate/answered/out of scope uncertainties,  
35 686 uncertainties remained. These were divided into twelve eye disease categories.  
36 Table 1 shows each category with the initial number of submissions received after  
37 the survey responses were submitted, the number of uncertainties sent to interim  
38 prioritisation, the number of participants at interim prioritisation and the number of  
39 uncertainties considered at the final prioritisation workshops.  
40  
41  
42  
43  
44

### 45 46 ***Interim prioritisation***

47 Respondents from the initial survey, organisations and eye healthcare professionals  
48 with expertise in the eye diseases in ten categories were contacted to provide interim  
49 priority rankings. The smaller number of questions asked in the categories relating to  
50 cataract and ocular cancer meant that an interim prioritisation exercise was not  
51 required for either category. A large response was received for the interim exercise,  
52 with input from 446 patients, carers and relatives plus 218 eye health professionals.  
53  
54  
55  
56  
57  
58  
59  
60

1  
2  
3  
4  
5  
6  
7  
8  
9  
10  
11  
12  
13  
14  
15  
16  
17  
18  
19  
20  
21  
22  
23  
24  
25  
26  
27  
28  
29  
30  
31  
32  
33  
34  
35  
36  
37  
38  
39  
40  
41  
42  
43  
44  
45  
46  
47  
48  
49  
50  
51  
52  
53  
54  
55  
56  
57  
58  
59  
60

Uncertainties accumulated scores based on rank and frequency, resulting in short lists of around 30 uncertainties per category which were taken to final workshops.

### ***Final prioritisation***

In April and May 2013, 12 final prioritisation workshops were held: one for each eye disease category. Balanced numbers of patients/carers/relatives and eye health professionals participated. In total, 155 participants attended across all 12 workshops: 78 patients and 77 clinicians (table 2). The topics debated at each workshop comprised between 19-31 questions per category. Overall 153 questions about sight loss and vision were considered resulting in lists of 10/11 priorities for each of the 12 categories (table 3). The questions addressed the broad topics of aetiology, prevention, identification and interventions with the number 1 questions as follows:

#### ***Age-related macular degeneration***

1. Can a treatment to stop dry AMD progressing and/or developing into the wet form be devised?

#### ***Cataract***

1. How can cataracts be prevented from developing?

#### ***Childhood-onset disorders***

1. How can cerebral visual impairment be identified, prevented and treated in children?

#### ***Corneal and external diseases***

1. Can new therapies such as gene or stem cell treatments be developed for corneal diseases?

#### ***Glaucoma***

1. What are the most effective treatments for glaucoma and how can treatment be improved?

#### ***Inherited retinal diseases***

1. Can a treatment to slow down progression or reverse sight loss in inherited retinal diseases be developed?

### ***Neuro-ophthalmology***

1. What is the underlying cause of optic nerve damage in optic neuropathies, such as anterior ischaemic optic neuropathy, Leber's hereditary optic neuropathy, optic neuritis and other optic neuropathies?

### ***Ocular cancer***

1. What can be done to help ocular cancer sufferers?

### ***Ocular inflammatory diseases***

1. What are the most effective treatments for ocular and orbital inflammatory diseases?

### ***Refractive error and ocular motility***

1. What factors influence the development of refractive error (myopia, astigmatism, presbyopia and long-sightedness)?

### ***Retinal vascular diseases***

1. What are the best methods to prevent retinopathy of prematurity?

### ***Vitreoretinal and ocular trauma***

1. How can surgical techniques be improved to save sight for eyes damaged by injury?

### **Discussion**

About 50% of sight loss in the UK is currently avoidable<sup>1</sup>. Recognising this and the UK's pre-eminent position in eye research, the Vision 2020UK ERG considered that any UK Research Agenda must look at addressing unavoidable sight loss for it to be credible. The challenge was to produce a coherently constructed and constituted prioritised research agenda whose methods were clear and for which there had been inclusive and widespread consultation, where everyone with an interest had been offered the opportunity to contribute and be heard. As a result of this priority setting partnership we have established top ten lists of research questions for a range of eye conditions.



1  
2  
3 There are a number of strengths to this study. The SLV-PSP is unique because it  
4 sought the combined views of patients, carers and eye health professionals to  
5 identify uncertainties about the prevention, diagnosis and treatment of sight loss and  
6 eye conditions and prioritise them for research to address<sup>5</sup>. It is rare that those with  
7 direct experience of conditions are able to influence the research agenda<sup>3,5,6</sup>. The  
8 views of patients, carers and professionals were given equal merit. All submitted  
9 questions were evaluated independently and equally. Duplicate questions and out of  
10 scope questions were removed. We did not encounter particular misunderstandings  
11 between lay persons and professionals or insufficient knowledge of the public. Open  
12 discussions occurred during the face-to-face workshops with good communication  
13 and facilitation to encourage respectful listening in accordance with James Lind  
14 Alliance guidelines. Questions could only be pooled if this was agreed by patients,  
15 carers and professionals. Where there was no agreement, the questions remained  
16 separate. Thus, any differing perspectives of priorities between participants were  
17 acknowledged. We did not aim to compare and contrast questions from patients,  
18 carers and professionals but to represent and act on all.

19  
20  
21 This SLV-PSP provided an extensive set of unanswered questions prioritised by  
22 patients, carers and eye health professionals across twelve categories of eye  
23 conditions. These questions addressed a broad range of eye conditions and  
24 considered issues of aetiology, prevention, screening, assessment and  
25 management. Importantly, the public were as likely to propose questions in relation  
26 to aetiology, assessment and management just as professionals were as likely to  
27 raise questions regarding impact of sight loss.

28  
29  
30 In addition to the strengths of our study, we identified a number of limitations. We  
31 were unable to calculate a response rate for the survey because of the nature of its  
32 design and implementation. We did not request the views of 'pure' researchers (i.e.  
33 scientists with no current clinical practice) as these individuals are intentionally  
34 excluded from the priority setting process by the James Lind Alliance. This step is a  
35 key feature of the James Lind Alliance methodology in which the remit is to provide  
36 an opportunity for patients, carers and clinicians to influence the research agenda.  
37 We acknowledge this is a different approach but do not consider their exclusion as a  
38 flaw in this process as we include clinical researchers who did take part alongside  
39 clinicians and the public.

1  
2  
3 These questions may now be used to encourage researchers to investigate what is  
4 most important to these groups. We do not know how our research questions  
5 compare to the prioritisation of research areas by scientists, government agencies or  
6 other organisation research funders. We are unaware of any systematic data  
7 collating such data.  
8

9  
10  
11 Various organisations in the sector have set out priorities for eye health and eye  
12 research in the past, for example Vision2020UK<sup>7</sup>. In addition, organisations  
13 representing the interests of patients/carers and eye health professionals took part in  
14 the process, both in promoting the survey and being directly involved in priority  
15 setting. Future work to review the SLV-PSP projects priorities with these  
16 organisations could be helpful in developing an understanding of how these new,  
17 patient and clinician led priorities can inform the sectors approach to commissioning  
18 research and focusing resources. Organisations in the sector are already working to  
19 review their organisational priorities with the SLV priorities, and have begun to invite  
20 researchers seeking funding to consider how their proposed research relates to the  
21 SLV priorities.  
22  
23

24  
25  
26 Similar to other PSP processes, we have provided information on our research  
27 priorities openly to national funding organisations and it is envisaged that research  
28 funders will be able to use the list to inform commissioned calls for research and  
29 identify which research applications to response mode funding opportunities can  
30 answer questions that these groups have agreed are a priority. Furthermore, any  
31 questions or uncertainties not prioritised in this process were submitted to and are  
32 currently available on the UK Database of Uncertainties about the Effects of  
33 Treatments (UK DUETs). Thus individuals looking for uncertainties for their research  
34 can access such information direct from UK DUETs. This sharing of information  
35 contributes to the quality assurance process of avoiding waste in research.  
36  
37

38  
39  
40 The SLV-PSP will also help to increase awareness of why research into sight loss  
41 and vision is necessary and important. It will be used to campaign for major funders  
42 to invest in sight loss and eye conditions, all of which are placing increased  
43 emphasis on researchers demonstrating how they have consulted and involved the  
44 public and patients in the process of developing their research.  
45  
46  
47  
48  
49  
50  
51  
52  
53  
54  
55  
56  
57  
58  
59  
60

1  
2  
3 These remain significant goals. For a sector with around 700 organisations to arrive  
4 at any kind of consensus for research priority areas, a process that was genuinely  
5 consultative, open and engaging to the individuals whose interests these  
6 organisations represent as well as at an organisational level was recognised as  
7 being critical. For a prioritisation exercise to be useful to the sector it needed to  
8 make sense to funders and statutory bodies with responsibilities and interests in  
9 these areas as well as to researchers. It was recognised that a prioritisation of  
10 research areas produced by a small group within the sector would not be credible  
11 and would never engage the support required for it to achieve the goals listed above.  
12  
13  
14  
15  
16  
17  
18  
19  
20

## 21 **Conclusions**

22  
23 Following a systematic process of national consultation and widespread survey of  
24 patients, carers and clinicians, 2220 individuals generated 4461 questions. Through  
25 a process of data analysis, interim prioritisation and final workshops, a top ten or  
26 eleven research questions have been identified for twelve categories of eye  
27 conditions. This is the first time, to our knowledge, that an exercise like this has been  
28 carried out anywhere in the world for sight loss and vision. Not only is this the most  
29 wide ranging and ambitious James Lind Alliance priority setting partnership, it also  
30 engaged a diversity of participants and enabled them to reach consensus together.  
31 For the first time, we have a clear idea of what the consumers of eye research – the  
32 patients and the people who care for and treat them – believe research money  
33 should be spent on. It has provided a focus for research in sight loss and vision and  
34 it is intended that these priorities are used to inform funders, researchers, clinicians  
35 and the public.  
36  
37  
38  
39  
40  
41  
42  
43  
44  
45  
46  
47  
48  
49  
50  
51  
52  
53  
54  
55  
56  
57  
58  
59  
60

1  
2  
3 **Competing interests:** The authors declare that they have no competing interests.  
4

5 **Funding:** This work was supported through funding and/or in-kind support by  
6 College of Optometrists, Fight for Sight, James Lind Alliance, NIHR Moorfields BRC,  
7 RNIB, Royal College of Ophthalmologists and UK Vision Strategy.  
8  
9

10 **Author contributions:** FR, RW, RC, MA, KB, MB, CBr, CBu, DC, KC, KE, MF, HG,  
11 IG, LH, RH, AL, MV, HW and AZ contributed to the conduct of the survey. FR, RW,  
12 RC, MA, MB, DC and KC were involved in the drafting of the paper. KB, CBr, CBu,  
13 KE, MF, HG, IG, LH, RH, AL, MV, HW and AZ contributed to proofing of the paper.  
14  
15  
16  
17

18 **Data sharing statement:** All original data are held by Fight for Sight. Extra data is  
19 available from: <http://www.library.nhs.uk/duets/SearchResults.aspx?catID=14501>  
20 The additional unpublished data includes research questions not included in the final  
21 top ten lists of research priorities.  
22  
23  
24  
25  
26  
27  
28  
29  
30  
31  
32  
33  
34  
35  
36  
37  
38  
39  
40  
41  
42  
43  
44  
45  
46  
47  
48  
49  
50  
51  
52  
53  
54  
55  
56  
57  
58  
59  
60

## References

1. Access Economics (2009) Future Sight Loss UK 1: The economic impact of partial sight and blindness in the UK adult population, RNIB
2. <http://www.vision2020uk.org.uk/>
3. Chalmers, I. and Glasziou, P. (2009) 'Avoidable waste in the production and reporting of research evidence', *The Lancet*, Vol. 374, pp. 86–89.
4. Sight loss and vision priority setting partnership. Setting priorities for eye research. (2013) Final report. [www.sightlosspsp.org.uk](http://www.sightlosspsp.org.uk)
5. Stewart, R. and Oliver, S. (2008) *A systematic map of studies of patients' and clinicians' research priorities*. London: James Lind Alliance.
6. Caron-Flinterman J, et al. (2006) Patients priorities concerning health research: the case of asthma and COPD research in the Netherlands. *Health Expectations*, 8, pp253–263.
7. UK Vision Strategy 2013-2018. [www.vision2020uk.org.uk](http://www.vision2020uk.org.uk)

Table 1 Categories of eye condition

|                                         | Initial number of survey questions | Number of questions at interim prioritisation | Number of participants at interim prioritisation | Number of questions at final prioritisation |
|-----------------------------------------|------------------------------------|-----------------------------------------------|--------------------------------------------------|---------------------------------------------|
| <b>Age-related macular degeneration</b> | 763                                | 43                                            | 101 PPI<br>25 Professionals                      | 29                                          |
| <b>Cataract</b>                         | 191                                | 27                                            | Not required                                     | 27                                          |
| <b>Childhood-onset disorders</b>        | 125                                | 69                                            | 12 PPI<br>20 Professionals                       | 30                                          |
| <b>Corneal and external diseases</b>    | 292                                | 93                                            | 25 PPI<br>38 Professionals                       | 30                                          |
| <b>Glaucoma</b>                         | 1235                               | 78                                            | 182 PPI<br>25 Professionals                      | 30                                          |
| <b>Inherited retinal diseases</b>       | 280                                | 63                                            | 27 PPI<br>25 Professionals                       | 30                                          |
| <b>Neuro-ophthalmology</b>              | 125                                | 43                                            | 15 PPI<br>21 Professionals                       | 30                                          |
| <b>Ocular cancer</b>                    | 26                                 | 19                                            | Not required                                     | 19                                          |

|                                             |     |    |                            |    |
|---------------------------------------------|-----|----|----------------------------|----|
| <b>Ocular inflammatory diseases</b>         | 472 | 66 | 27 PPI<br>21 Professionals | 30 |
| <b>Refractive error and ocular motility</b> | 188 | 70 | 21 PPI<br>23 Professionals | 31 |
| <b>Retinal vascular diseases</b>            | 205 | 56 | 15 PPI<br>12 Professionals | 30 |
| <b>Vitreoretinal and ocular trauma</b>      | 265 | 59 | 21 PPI<br>8 Professionals  | 30 |

PPI: Inclusive of patients, carers, relatives, organisation representatives.

Professionals: Inclusive of eye health professions.

**Table 2** Final workshop participants

| Category                             | Total number of workshop participants | Number of patients, relatives, carers, patient groups and organisations | Number of eye health professionals |
|--------------------------------------|---------------------------------------|-------------------------------------------------------------------------|------------------------------------|
| Age-related Macular Degeneration     | 17                                    | 9                                                                       | 8                                  |
| Cataract                             | 11                                    | 5                                                                       | 6                                  |
| Childhood-Onset Disorders            | 16                                    | 7                                                                       | 9                                  |
| Corneal and External Diseases        | 12                                    | 5                                                                       | 7                                  |
| Glaucoma                             | 17                                    | 9                                                                       | 8                                  |
| Inherited Retinal Diseases           | 19                                    | 11                                                                      | 8                                  |
| Neuro-ophthalmology                  | 10                                    | 6                                                                       | 4                                  |
| Ocular Cancer                        | 10                                    | 6                                                                       | 4                                  |
| Ocular Inflammatory Diseases         | 10                                    | 5                                                                       | 5                                  |
| Refractive Error and Ocular Motility | 12                                    | 5                                                                       | 7                                  |
| Retinal Vascular Diseases            | 11                                    | 3                                                                       | 8                                  |
| Vitreoretinal and Ocular Trauma      | 10                                    | 7                                                                       | 3                                  |
| <b>TOTAL</b>                         | <b>155</b>                            | <b>78</b>                                                               | <b>77</b>                          |



**Table 3** Top ten lists per category

|    | <b>Age-related macular degeneration</b>                                                                                            | <b>Cataract</b>                                                                                                                                | <b>Childhood-onset disorders</b>                                                                                                                              | <b>Corneal and external diseases</b>                                                                    | <b>Glaucoma</b>                                                                                           | <b>Inherited retinal diseases</b>                                                                                                                                           |
|----|------------------------------------------------------------------------------------------------------------------------------------|------------------------------------------------------------------------------------------------------------------------------------------------|---------------------------------------------------------------------------------------------------------------------------------------------------------------|---------------------------------------------------------------------------------------------------------|-----------------------------------------------------------------------------------------------------------|-----------------------------------------------------------------------------------------------------------------------------------------------------------------------------|
| 1  | Can a treatment to stop dry AMD progressing and/or developing into the wet form be devised?                                        | How can cataracts be prevented from developing?                                                                                                | How can cerebral visual impairment be identified, prevented and treated in children?                                                                          | Can new therapies such as gene or stem cell treatments be developed for corneal diseases?               | What are the most effective treatments for glaucoma and how can treatment be improved?                    | Can a treatment to slow down progression or reverse sight loss in inherited retinal diseases be developed?                                                                  |
| 2  | What is the cause of AMD?                                                                                                          | Can the return of cloudy or blurred vision after cataract surgery known as posterior capsule opacity (PCO) or secondary cataract be prevented? | How can treatment for visual pathway damage associated with pre-term birth be developed?                                                                      | What is the most effective management for dry eye and can new strategies be developed?                  | How can loss of vision be restored for people with glaucoma?                                              | How can sight loss be prevented in an individual with inherited retinal disease?                                                                                            |
| 3  | How can AMD be prevented?                                                                                                          | How can cataract progression be slowed down?                                                                                                   | How do we improve screening and surveillance from the ante-natal period through to childhood to ensure early diagnosis of impaired vision and eye conditions? | Can treatments to save eye sight from microbial keratitis be improved?                                  | How can glaucoma be stopped from progressing?                                                             | Is a genetic (molecular) diagnosis possible for all inherited retinal diseases?                                                                                             |
| 4  | Are there ways of restoring sight loss for people with AMD?                                                                        | What alternatives to treat cataracts other than cataract surgery are being developed?                                                          | Can the treatment of amblyopia be improved to produce better short and long term outcomes than are possible with current treatments?                          | How can the rejection of corneal transplants be prevented?                                              | What can be done to improve early diagnosis of sight-threatening glaucoma?                                | What factors affect the progression of sight loss in inherited retinal diseases?                                                                                            |
| 5  | Can the development of AMD be predicted?                                                                                           | What is the cause of cataract?                                                                                                                 | How can cataract be prevented in children?                                                                                                                    | Can the outcomes of corneal transplantation be improved?                                                | What causes glaucoma?                                                                                     | What causes sight loss in inherited retinal diseases?                                                                                                                       |
| 6  | What is the most effective way to detect and monitor the progression of early AMD?                                                 | How can cataract surgery outcomes be improved?                                                                                                 | What are the causes of coloboma and microphthalmia/anophthalmia and how can they be prevented?                                                                | What causes keratoconus to progress and can progression be prevented?                                   | What is the most effective way of monitoring the progression of glaucoma?                                 | What is the most effective way to support patients with inherited retinal disease?                                                                                          |
| 7  | What factors influence the progression of AMD?                                                                                     | How safe and effective is laser assisted cataract surgery?                                                                                     | Can vision be corrected in later life for people with amblyopia?                                                                                              | Can non-surgical therapy be developed for Fuchs' corneal dystrophy?                                     | How can glaucoma patients with a higher risk to progress rapidly be detected?                             | Can the diagnosis of inherited retinal diseases be refined so that individuals can be given a clearer idea about their specific condition and how it is likely to progress? |
| 8  | Can a non-invasive therapy be developed for wet AMD?                                                                               | Should accommodative lenses be developed for cataract surgery?                                                                                 | How can retinoblastoma be identified, prevented and treated in children?                                                                                      | Can corneal infections be prevented in high-risk individuals such as contact lens wearers?              | Why is glaucoma more aggressive in people of certain ethnic groups, such as those of West African origin? | What is the relationship between sight loss and mental health for people with inherited retinal diseases?                                                                   |
| 9  | Can dietary factors, nutritional supplements, complementary therapies or lifestyle changes prevent or slow the progression of AMD? | What is the best measure of visual disability due to cataract?                                                                                 | Can better treatments for glaucoma in children be developed?                                                                                                  | What is the cause of keratoconus and can it be prevented?                                               | How can glaucoma be prevented?                                                                            | Would having a treatment for an inherited retinal disease preclude a patient from having another treatment?                                                                 |
| 10 | What are the best enablement strategies for people with AMD?                                                                       | Can retinal detachment be prevented after cataract surgery?                                                                                    | Can a treatment be developed to improve vision for people with albinism?                                                                                      | What is the most effective management of ocular complications associated with Stevens Johnson Syndrome? | Is there a link between treatment adherence and glaucoma progression and how can adherence be improved?   | With regard to inherited retinal diseases what is the role of pre-natal and pre-implantation diagnosis in helping parents make informed choices?                            |
| 11 |                                                                                                                                    | What are the outcomes for cataract surgery among people with different levels of cognitive                                                     |                                                                                                                                                               | Can severe ocular surface disease in children, such as blepharokeratoconjunctivitis and                 |                                                                                                           |                                                                                                                                                                             |

1  
2  
3  
4  
5  
6  
7  
8  
9  
10  
11  
12  
13  
14  
15  
16  
17  
18  
19  
20  
21  
22  
23  
24  
25  
26  
27  
28  
29  
30  
31  
32  
33  
34  
35  
36  
37  
38  
39  
40  
41  
42  
43  
44  
45  
46  
47  
48  
49

|   | <i>Neuro-ophthalmology</i>                                                                                                                                                                                              | <i>Ocular cancer</i>                                                                                               | <i>Ocular inflammatory diseases</i>                                                        | <i>Refractive error and ocular motility</i>                                                                                                                                                       | <i>Retinal vascular diseases</i>                                                                                     | <i>Vitreoretinal and ocular trauma</i>                                                                    |
|---|-------------------------------------------------------------------------------------------------------------------------------------------------------------------------------------------------------------------------|--------------------------------------------------------------------------------------------------------------------|--------------------------------------------------------------------------------------------|---------------------------------------------------------------------------------------------------------------------------------------------------------------------------------------------------|----------------------------------------------------------------------------------------------------------------------|-----------------------------------------------------------------------------------------------------------|
| 1 | What is the underlying cause of optic nerve damage in optic neuropathies, such as anterior ischaemic optic neuropathy, Leber's hereditary optic neuropathy, optic neuritis and other optic neuropathies?                | What can be done to help ocular cancer sufferers?                                                                  | What are the most effective treatments for ocular and orbital inflammatory diseases?       | What factors influence the development of refractive error (myopia, astigmatism, presbyopia and long-sightedness)?                                                                                | What are the best methods to prevent retinopathy of prematurity?                                                     | How can surgical techniques be improved to save sight for eyes damaged by injury?                         |
| 2 | What are the most effective treatments and rehabilitation for optic neuropathies, e.g. Leber's hereditary optic neuropathy and anterior ischaemic optic neuropathy?                                                     | Can gene-based targeted therapies for ocular cancers be developed?                                                 | What causes thyroid eye disease?                                                           | What is the cause of both congenital and acquired nystagmus?                                                                                                                                      | How can sight loss from diabetic retinal changes be prevented and reduced?                                           | How can the risk of losing sight for people with retinal detachment be reduced?                           |
| 3 | Can vision loss due to optic nerve diseases such as giant cell arteritis, Leber's hereditary optic neuropathy, optic neuritis and optic atrophy, be restored, for example through gene therapy and stem cell treatment? | How can immunotherapy be used to fight metastatic ocular melanoma?                                                 | Can the severity of ocular and orbital inflammatory disease in an individual be predicted? | How can the development of binocular vision in young children with squint and amblyopia be promoted, and would the same approach work in older individuals without inducing intractable diplopia? | What are the predictive factors for the progression to sight threatening diabetic eye disease?                       | How can better interventions be developed that are effective in treating vitreous opacities/eye floaters? |
| 4 | What rehabilitation or treatment methods are most effective for vision loss following brain damage due to stroke, brain injury, cerebral vision impairment, tumours and dementias?                                      | What are the most effective detection and screening methods for follow up to detect metastasis of ocular melanoma? | Is it possible to prevent further occurrences of retinal damage caused by toxoplasmosis?   | Would correction of refractive error have a positive impact on early life learning and development?                                                                                               | Is there a way to improve screening of premature babies for retinopathy of prematurity?                              | What causes retinal detachment and can it be prevented?                                                   |
| 5 | What is the most effective way to assess vision in patients with neurological visual impairment i.e. stroke, dementia and cerebral/cortical visual impairment?                                                          | How can follow-up for ocular complications be managed in patients with ocular melanoma?                            | What causes birdshot retinopathy?                                                          | Does early diagnosis of refractive error improve long-term prognosis and promote faster, more effective treatment?                                                                                | Can an effective long lasting treatment for diabetic macular oedema, both ischaemic and non-ischaemic, be developed? | Can more effective diagnostic tools be developed for assessing the vitreous and eye floaters?             |
| 6 | Can the early stages of optic neuropathy be detected?                                                                                                                                                                   | What is the best management of metastatic choroidal melanoma?                                                      | Why does disease burn out in patients with ocular and orbital inflammatory diseases?       | What is the effect of congenital nystagmus on visual and emotional development?                                                                                                                   | Can a retinal vein occlusion be predicted and prevented?                                                             | Can a functioning prosthetic eye be developed to replace an eye damaged by injury?                        |
| 7 | How can optic neuropathies be prevented, for example anterior ischaemic optic neuropathy, Leber's hereditary optic neuropathy, optic neuritis and other optic neuropathies?                                             | What activates choroidal melanoma metastasis in the liver after the primary melanoma has been treated?             | Can early detection methods be developed for ocular and orbital inflammatory diseases?     | What is the most effective treatment for exotropia and when should it be delivered?                                                                                                               | Can new non-invasive treatments be developed to slow down the progression of diabetic retinopathy?                   | How can epiretinal membrane/fibrosis be prevented or treated?                                             |
| 8 | Can treatments be developed for visual field and ocular                                                                                                                                                                 | Can adjuvant therapies be developed to treat ocular                                                                | What medications best prevent the development of eye disease in                            | How can the functional effects of surgical treatment for squint best                                                                                                                              | What are the barriers that prevent diabetic patients                                                                 | Can stem cells be used to regrow an eye or part of an eye?                                                |

|    |    |                                                                     |                                                                |                                                                                                                                                    |                                                                                                                                         |                                                                          |
|----|----|---------------------------------------------------------------------|----------------------------------------------------------------|----------------------------------------------------------------------------------------------------------------------------------------------------|-----------------------------------------------------------------------------------------------------------------------------------------|--------------------------------------------------------------------------|
| 1  |    |                                                                     |                                                                |                                                                                                                                                    |                                                                                                                                         |                                                                          |
| 2  |    |                                                                     |                                                                |                                                                                                                                                    |                                                                                                                                         |                                                                          |
| 3  |    |                                                                     |                                                                |                                                                                                                                                    |                                                                                                                                         |                                                                          |
| 4  |    |                                                                     |                                                                |                                                                                                                                                    |                                                                                                                                         |                                                                          |
| 5  |    |                                                                     |                                                                |                                                                                                                                                    |                                                                                                                                         |                                                                          |
| 6  | 9  | What are the causes of ocular cancer and how can they be prevented? | Behcets?<br><br>What causes scleritis?                         | be assessed?<br><br>Could the accurate testing of refractive error be made less dependent on a subjective response i.e. the person's own response? | having regular eye checks?<br><br>What rehabilitation programmes are best for the management of distorted vision from retinal diseases? | What causes posterior vitreous detachment/vitreous syneresis?            |
| 7  |    |                                                                     |                                                                |                                                                                                                                                    |                                                                                                                                         |                                                                          |
| 8  |    |                                                                     |                                                                |                                                                                                                                                    |                                                                                                                                         |                                                                          |
| 9  |    |                                                                     |                                                                |                                                                                                                                                    |                                                                                                                                         |                                                                          |
| 10 | 10 | What is the most effective treatment for primary ocular melanoma?   | Can diet or lifestyle changes prevent uveitis from developing? | How can myopia be prevented?                                                                                                                       | What is the efficacy and safety of anti-VEGF agents in the treatment of retinopathy of prematurity?                                     | Are there methods to prevent and improve the treatment of macular holes? |
| 11 |    |                                                                     |                                                                |                                                                                                                                                    |                                                                                                                                         |                                                                          |
| 12 |    |                                                                     |                                                                |                                                                                                                                                    |                                                                                                                                         |                                                                          |
| 13 |    |                                                                     |                                                                |                                                                                                                                                    |                                                                                                                                         |                                                                          |
| 14 |    |                                                                     |                                                                |                                                                                                                                                    |                                                                                                                                         |                                                                          |
| 15 |    |                                                                     |                                                                |                                                                                                                                                    |                                                                                                                                         |                                                                          |
| 16 |    |                                                                     |                                                                |                                                                                                                                                    |                                                                                                                                         |                                                                          |
| 17 |    |                                                                     |                                                                |                                                                                                                                                    |                                                                                                                                         |                                                                          |
| 18 |    |                                                                     |                                                                |                                                                                                                                                    |                                                                                                                                         |                                                                          |
| 19 |    |                                                                     |                                                                |                                                                                                                                                    |                                                                                                                                         |                                                                          |
| 20 |    |                                                                     |                                                                |                                                                                                                                                    |                                                                                                                                         |                                                                          |
| 21 |    |                                                                     |                                                                |                                                                                                                                                    |                                                                                                                                         |                                                                          |
| 22 |    |                                                                     |                                                                |                                                                                                                                                    |                                                                                                                                         |                                                                          |
| 23 |    |                                                                     |                                                                |                                                                                                                                                    |                                                                                                                                         |                                                                          |
| 24 |    |                                                                     |                                                                |                                                                                                                                                    |                                                                                                                                         |                                                                          |
| 25 |    |                                                                     |                                                                |                                                                                                                                                    |                                                                                                                                         |                                                                          |
| 26 |    |                                                                     |                                                                |                                                                                                                                                    |                                                                                                                                         |                                                                          |
| 27 |    |                                                                     |                                                                |                                                                                                                                                    |                                                                                                                                         |                                                                          |
| 28 |    |                                                                     |                                                                |                                                                                                                                                    |                                                                                                                                         |                                                                          |
| 29 |    |                                                                     |                                                                |                                                                                                                                                    |                                                                                                                                         |                                                                          |
| 30 |    |                                                                     |                                                                |                                                                                                                                                    |                                                                                                                                         |                                                                          |
| 31 |    |                                                                     |                                                                |                                                                                                                                                    |                                                                                                                                         |                                                                          |
| 32 |    |                                                                     |                                                                |                                                                                                                                                    |                                                                                                                                         |                                                                          |
| 33 |    |                                                                     |                                                                |                                                                                                                                                    |                                                                                                                                         |                                                                          |
| 34 |    |                                                                     |                                                                |                                                                                                                                                    |                                                                                                                                         |                                                                          |
| 35 |    |                                                                     |                                                                |                                                                                                                                                    |                                                                                                                                         |                                                                          |
| 36 |    |                                                                     |                                                                |                                                                                                                                                    |                                                                                                                                         |                                                                          |
| 37 |    |                                                                     |                                                                |                                                                                                                                                    |                                                                                                                                         |                                                                          |
| 38 |    |                                                                     |                                                                |                                                                                                                                                    |                                                                                                                                         |                                                                          |
| 39 |    |                                                                     |                                                                |                                                                                                                                                    |                                                                                                                                         |                                                                          |
| 40 |    |                                                                     |                                                                |                                                                                                                                                    |                                                                                                                                         |                                                                          |
| 41 |    |                                                                     |                                                                |                                                                                                                                                    |                                                                                                                                         |                                                                          |
| 42 |    |                                                                     |                                                                |                                                                                                                                                    |                                                                                                                                         |                                                                          |
| 43 |    |                                                                     |                                                                |                                                                                                                                                    |                                                                                                                                         |                                                                          |
| 44 |    |                                                                     |                                                                |                                                                                                                                                    |                                                                                                                                         |                                                                          |
| 45 |    |                                                                     |                                                                |                                                                                                                                                    |                                                                                                                                         |                                                                          |
| 46 |    |                                                                     |                                                                |                                                                                                                                                    |                                                                                                                                         |                                                                          |
| 47 |    |                                                                     |                                                                |                                                                                                                                                    |                                                                                                                                         |                                                                          |
| 48 |    |                                                                     |                                                                |                                                                                                                                                    |                                                                                                                                         |                                                                          |
| 49 |    |                                                                     |                                                                |                                                                                                                                                    |                                                                                                                                         |                                                                          |

**Figure legends**

Figure 1: Flowchart showing the steps of the process from Stage 1 when establishing the PSP through to Stage 5 at the final prioritisation.

Figure 2: Background of respondents showing that questions were largely received from people who have sight loss or an eye condition, but also including eye health professions, organisations, parents, family and carers.

**The Sight Loss and Vision Priority Setting Partnership (SLV-PSP): Overview and results of the research prioritisation survey process.**

Fiona Rowe<sup>1</sup>, Richard Wormald<sup>2,3</sup>, Richard Cable<sup>4</sup>, Michele Acton<sup>4</sup>, Karen Bonstein<sup>5</sup>, Michael Bowen<sup>6</sup>, Carol Bronze<sup>7</sup>, Catey Bunce<sup>2,3,5</sup>, Dolores Conroy<sup>4</sup>, Katherine Cowan<sup>8</sup>, Kathy Evans<sup>9</sup>, Mark Fenton<sup>10</sup>, Heather Giles<sup>7</sup>, Iris Gordon<sup>3</sup>, Louise Halfhide<sup>5</sup>, Robert Harper<sup>11</sup>, Anita Lightstone<sup>12</sup>, Marcela Votruba<sup>13</sup>, Heather Waterman<sup>14</sup>, Antra Zekite<sup>2</sup>

1. British and Irish Orthoptic Society, London, UK
2. Department of Ophthalmology, Moorfields Eye Hospital NHS Foundation Trust, London, UK
3. The Cochrane Eyes and Vision Group, London School of Hygiene and Tropical Medicine, London, UK
4. Fight for Sight, London, UK
5. NIHR Biomedical Research Centre at Moorfields and UCL Institute of Ophthalmology, London, UK
6. College of Optometrists, London, UK
7. Patient representative
8. The James Lind Alliance (JLA) –National Institute for Health Research, Southampton, UK
9. Royal College of Ophthalmologists, London, UK
10. UK DUETs (NICE Evidence – UK Database of Uncertainties about the Effects of Treatments), London, UK
11. Department of Optometry, Manchester Royal Eye Hospital, Manchester, UK
12. UK Vision Strategy / VISION 2020 UK, London, UK
13. Department of Ophthalmology, Cardiff University, Cardiff, UK
14. Department of Nursing, University of Manchester, Manchester, UK

**Corresponding author:**

Dr Fiona Rowe

Department of Health Services Research,

1  
2  
3 WhelanBuilding (1.10),  
4

5 University of Liverpool,  
6

7 Brownlow Hill,  
8

9  
10 Liverpool L69 3GB  
11

12 T: 0151 7944956  
13

14 E: rowef@liverpool.ac.uk  
15  
16  
17  
18  
19

20 **Word count:** 2573  
21

22 **Number of figures:** 2  
23

24 **Number of tables:** 3  
25  
26

27 **Short title:** Sight Loss and Vision Priority Setting Partnership  
28

29 **Competing interests:** The authors declare that they have no competing interests.  
30  
31

32 **Funding:** This work was supported through funding and/or in-kind support by  
33 College of Optometrists, Fight for Sight, James Lind Alliance, NIHR Moorfields BRC,  
34 RNIB, Royal College of Ophthalmologists and UK Vision Strategy.  
35  
36  
37

38 **Author contributions:** FR, RW, RC, MA, KB, MB, CBr, CBu, DC, KC, KE, MF, HG,  
39 IG, LH, RH, AL, MV, HW and AZ contributed to the conduct of the survey. FR, RW,  
40 RC, MA, MB, DC and KC were involved in the drafting of the paper. KB, CBr, CBu,  
41 KE, MF, HG, IG, LH, RH, AL, MV, HW and AZ contributed to proofing of the paper.  
42  
43  
44

45 **Data sharing statement:** All original data are held by Fight for Sight. Extra data is  
46 available from: <http://www.library.nhs.uk/duets/SearchResults.aspx?catID=14501>  
47  
48 The additional unpublished data includes research questions not included in the final  
49 top ten lists of research priorities.  
50  
51  
52  
53  
54  
55  
56  
57  
58  
59  
60

## Abstract

Objectives: The Sight Loss and Vision Priority Setting Partnership aimed to identify research priorities relating to sight loss and vision through consultation with patients, carers and clinicians. These priorities can be used to inform funding bodies' decisions and enhance the case for additional research funding.

Design: Prospective survey with support from the James Lind Alliance.

Setting: UK wide NHS and non-NHS.

Participants: Patients, carers and eye health professionals. Academic researchers were excluded **solely from the prioritisation process**. The survey was disseminated by patient groups, professional bodies, at conferences and through the media, and was available for completion online, by phone, by post and by alternative formats (Braille and audio).

Outcome measure: People were asked to submit the questions about prevention, diagnosis and treatment of sight loss and eye conditions that they most wanted to see answered by research. Returned survey questions were reviewed by a data assessment group. **Priorities** were established across eye disease categories at final workshops.

Results: 2,220 people responded generating 4,461 submissions. Sixty-five percent of respondents had sight loss and/or an eye condition. Following initial data analysis, 686 submissions remained which were circulated for interim prioritisation (excluding cataract and ocular cancer questions) to 446 patients/carers and 218 professionals. The remaining 346 questions were discussed at final prioritisation workshops to reach agreement of top questions per category.

Conclusions: The exercise engaged a diverse community of stakeholders generating a wide range of conditions and research questions. Top priority questions were established across 12 eye disease categories.

**Keywords:** Sight loss; Vision; Research; Priorities; Partnership; James Lind Alliance

## Article summary

1  
2  
3 Strengths and limitations of this study:  
4

- 5 • Wide ranging and comprehensive coverage
- 6
- 7 • Substantial response
- 8
- 9
- 10 • The hardest to reach and those with the least opportunity to be heard may
- 11 indeed have not been heard
- 12
- 13 • Any such groups now feeling excluded should have an opportunity to redress
- 14 this.
- 15
- 16
- 17
- 18
- 19
- 20

## 21 Introduction

22  
23  
24 In the UK it is estimated that almost 2 million people are affected by sight loss and  
25 this number is expected to double by 2050<sup>1</sup>. Currently 50% of sight loss in the UK is  
26 avoidable but there are also many unavoidable sight loss conditions. Whether it is to  
27 address childhood eye conditions or those affecting adults, research is needed to  
28 inform us about prevention, to develop new techniques for early diagnosis and to  
29 develop new and more effective treatments for many eye conditions.  
30  
31

32  
33  
34 The Sight Loss and Vision Priority Setting Partnership (SLV-PSP) was developed  
35 from earlier work by the Eye Research Group (ERG) of VISION 2020 UK whose  
36 mission is the elimination of avoidable sight loss and the amelioration of the effects  
37 of sight loss when it cannot be avoided<sup>2</sup>. The UK Vision Strategy sets out ways of  
38 addressing avoidable sight loss in the UK. There is much that can be done to  
39 improve the nation's eye health, and to eliminate avoidable sight loss. There are  
40 however gaps in the evidence base regarding eye health interventions and the best  
41 way to deliver services. Research is needed to support the UK Vision Strategy. In  
42 key areas research is urgently required to enable the Vision Strategy to be  
43 implemented in an evidence-based way that ensures efficient and effective  
44 development.  
45  
46  
47  
48  
49  
50  
51  
52

53  
54 Despite on-going research in the UK and other countries, there are still many  
55 questions about the prevention, diagnosis and treatment of sight loss and eye  
56 conditions that remain unanswered. Given that resources for research are limited, it  
57  
58  
59  
60

1  
2  
3 is important for research funders to understand how patients, carers and eye health  
4 professionals prioritise these unanswered questions so that future research can be  
5 consolidated and targeted accordingly<sup>3</sup>.  
6  
7

8  
9 The purpose of this project was to undertake a comprehensive, UK-wide, survey of  
10 patients, carers and clinicians to identify research questions and priorities to inform  
11 decisions of funding bodies and enhance the case for additional research funding.  
12  
13

14 The priority setting process has been well established by the James Lind Alliance  
15 (JLA) (<http://www.lindalliance.org/>) which has supported partnerships on a range of  
16 topics since 2004. This partnership initiated by Fight for Sight, the UK's leading eye  
17 research charity was established with support, financial and in kind, from the College  
18 of Optometrists, the Royal College of Ophthalmologists, the NIHR Moorfields  
19 Biomedical Research Centre, the RNIB, UK Vision Strategy and the Cochrane Eyes  
20 and Vision Group. A representative from the JLA convened meetings of the steering  
21 committee and provided independent chairmanship for this and the priority setting  
22 workshops. Their extensive experience in this process ensured no single voice  
23 exerted undue influence over the prioritisation process and that the views of patients,  
24 their carers and clinicians were paramount. The views of researchers with no clinical  
25 involvement with patients and views of commercial organisations were not included  
26 in the prioritisation.  
27  
28  
29  
30  
31  
32  
33  
34  
35  
36  
37  
38  
39

## 40 **Methods and materials**

41  
42 The detailed methods for this prioritisation process have been described in detail  
43 elsewhere<sup>4</sup>. In brief, the process comprised five stages (figure 1). **Our study did not**  
44 **require ethical approval or consent from participants. James Lind Alliance priority**  
45 **setting partnerships do not require ethical approval. Dissemination of the survey was**  
46 **via open communications through professional bodies, charities and related**  
47 **organisations. The survey was not undertaken through Higher Education Institutes or**  
48 **through NHS organisations and does not recruit NHS patients. The survey contained**  
49 **clear information on the aims of the priority setting partnership, how the process**  
50 **works and how data will be used. In addition, submission of questions was**  
51 **anonymised. For the workshops in which priorities were discussed and agreed,**  
52  
53  
54  
55  
56  
57  
58  
59  
60



1  
2  
3 participants choose to voluntarily attend and consent was not required for this. We  
4 followed the ethical guidance for participation, information and evaluation from the  
5 James Lind Alliance guidebook ([http://www.jla-guidebook.org/jla-](http://www.jla-guidebook.org/jla-guidebook.asp?val=56)  
6 [guidebook.asp?val=56](http://www.jla-guidebook.org/jla-guidebook.asp?val=56)).  
7  
8  
9

### 10 ***Establishing the SLV-PSP***

11  
12 A steering committee and data assessment group comprising the authors of this  
13 article oversaw the process. Each member was responsible for contributing to and  
14 managing a part of the process and was selected for their expertise and association  
15 with eye research. The steering committee also included patient representatives  
16 and eye health professionals. In April 2012 an initial stakeholder meeting was held to  
17 engage the groups and organisations with member bases and community influence.  
18 This was to ensure that the initial survey would be disseminated and completed by  
19 as many patients, relatives, carers and eye health professionals as possible in the  
20 UK.  
21  
22  
23  
24  
25  
26  
27

### 28 ***Main survey***

29  
30 The SLV-PSP survey was launched on 1 May 2012 and was open until 31 July 2012.  
31 The aim of the survey was to identify patients', carers' and eye health professionals'  
32 unanswered questions about sight loss and eye conditions. The survey's primary  
33 question was "What question(s) about the prevention, diagnosis and treatment of  
34 sight loss and eye conditions would you like to see answered by research?"  
35  
36  
37  
38  
39

### 40 ***Data analysis***

41  
42 Following closure of the survey, all submissions were examined. Out-of-scope  
43 submissions were removed including those not related to the topic and uncertainties  
44 better suited to social research. In-scope uncertainties were allocated into disease-  
45 specific groups and re-worded in PICO format (Population, Intervention,  
46 Comparison, Outcome). Searches were then undertaken to ascertain whether or not  
47 each uncertainty could be answered by an up-to-date systematic review. All  
48 unanswered uncertainties were then allocated to one of 12 eye disease categories,  
49 with duplicates removed and similar questions combined. Checks were also made to  
50 identify any on-going trials which might address the uncertainty. The 12 categories  
51  
52  
53  
54  
55  
56  
57  
58  
59  
60

1  
2  
3 were formed following discussions by the steering group on the most logical and  
4 pragmatic way to organise the data within the time and resources available.  
5  
6

### 7 ***Interim prioritisation***

8  
9  
10 In order to start reducing the number of uncertainties, an interim prioritisation  
11 exercise was conducted over email and by post. Patients, carers and eye health  
12 professionals were invited to examine the long lists and then choose and rank 10 of  
13 the uncertainties.  
14  
15

### 16 ***Final prioritisation***

17  
18  
19 The remaining uncertainties were ranked by patients, carers, relatives, organisation  
20 representatives and eye health professionals in one-day workshops facilitated by the  
21 JLA, using Nominal Group Technique – a mix of discussion and ranking. For each  
22 category, the top 10/11 questions were agreed.  
23  
24  
25  
26  
27  
28

## 29 **Results**

### 30 ***Main survey***

31  
32  
33 In response to the survey, 2220 people generated 4461 submissions. Of these  
34 respondents, 17% identified themselves as healthcare professionals including  
35 primarily ophthalmologists, optometrists, orthoptists, ophthalmic nurses, opticians  
36 and people working in social care and rehabilitation (figure 2). Over 60% were  
37 people with sight loss or an eye condition. The average age of survey participants  
38 was 65.7 years old (range:16 months (proxy completion of survey by adult carer)to  
39 105 years). Just under two thirds (62%) of respondents were female. The  
40 geographical split was: England 89%; Scotland 6%; Wales 4%; Northern Ireland 1%.  
41  
42  
43  
44  
45  
46  
47

### 48 ***Data analysis***

49  
50  
51 Following data analysis to remove duplicate/answered/out of scope uncertainties,  
52 686 uncertainties remained. These were divided into twelve eye disease categories.  
53 Table 1 shows each category with the initial number of submissions received after  
54 the survey responses were submitted, the number of uncertainties sent to interim  
55  
56  
57  
58  
59  
60

1  
2  
3 prioritisation, the number of participants at interim prioritisation and the number of  
4 uncertainties considered at the final prioritisation workshops.  
5  
6

### 7 ***Interim prioritisation***

8  
9 Respondents from the initial survey, organisations and eye healthcare professionals  
10 with expertise in the eye diseases in ten categories were contacted to provide interim  
11 priority rankings. The smaller number of questions asked in the categories relating to  
12 cataract and ocular cancer meant that an interim prioritisation exercise was not  
13 required for either category. A large response was received for the interim exercise,  
14 with input from 446 patients, carers and relatives plus 218 eye health professionals.  
15  
16  
17  
18  
19  
20  
21  
22  
23  
24  
25  
26  
27  
28  
29  
30  
31  
32  
33  
34  
35  
36  
37  
38  
39  
40  
41  
42  
43  
44  
45  
46  
47  
48  
49  
50  
51  
52  
53  
54  
55  
56  
57  
58  
59  
60

### ***Final prioritisation***

In April and May 2013, 12 final prioritisation workshops were held: one for each eye  
disease category. Balanced numbers of patients/carers/relatives and eye health  
professionals participated. In total, 155 participants attended across all 12  
workshops: 78 patients and 77 clinicians (table 2). The topics debated at each  
workshop comprised between 19-31 questions per category. Overall 153 questions  
about sight loss and vision were considered resulting in lists of 10/11 priorities for  
each of the 12 categories (table 3). The questions addressed the broad topics of  
aetiology, prevention, identification and interventions with the number 1 questions as  
follows:

#### ***Age-related macular degeneration***

1. Can a treatment to stop dry AMD progressing and/or developing into the wet form be devised?

#### ***Cataract***

1. How can cataracts be prevented from developing?

#### ***Childhood-onset disorders***

1. How can cerebral visual impairment be identified, prevented and treated in children?

#### ***Corneal and external diseases***

- 1  
2  
3 1. Can new therapies such as gene or stem cell treatments be developed for  
4 corneal diseases?  
5

6 ***Glaucoma***  
7

- 8 1. What are the most effective treatments for glaucoma and how can treatment  
9 be improved?  
10

11 ***Inherited retinal diseases***  
12

- 13 1. Can a treatment to slow down progression or reverse sight loss in inherited  
14 retinal diseases be developed?  
15

16 ***Neuro-ophthalmology***  
17

- 18 1. What is the underlying cause of optic nerve damage in optic neuropathies,  
19 such as anterior ischaemic optic neuropathy, Leber's hereditary optic  
20 neuropathy, optic neuritis and other optic neuropathies?  
21

22 ***Ocular cancer***  
23

- 24 1. What can be done to help ocular cancer sufferers?  
25

26 ***Ocular inflammatory diseases***  
27

- 28 1. What are the most effective treatments for ocular and orbital inflammatory  
29 diseases?  
30

31 ***Refractive error and ocular motility***  
32

- 33 1. What factors influence the development of refractive error (myopia,  
34 astigmatism, presbyopia and long-sightedness)?  
35

36 ***Retinal vascular diseases***  
37

- 38 1. What are the best methods to prevent retinopathy of prematurity?  
39

40 ***Vitreoretinal and ocular trauma***  
41

- 42 1. How can surgical techniques be improved to save sight for eyes damaged by  
43 injury?  
44

45 **Discussion**  
46

47 About 50% of sight loss in the UK is currently avoidable<sup>1</sup>. Recognising this and the  
48 UK's pre-eminent position in eye research, the Vision 2020UK ERG considered that  
49  
50  
51  
52  
53  
54  
55

1  
2  
3 any UK Research Agenda must look at addressing unavoidable sight loss for it to be  
4 credible. The challenge was to produce a coherently constructed and constituted  
5 prioritised research agenda whose methods were clear and for which there had been  
6 inclusive and widespread consultation, where everyone with an interest had been  
7 offered the opportunity to contribute and be heard. **As a result of this priority setting  
8 partnership we have established top ten lists of research questions for a range of  
9 eye conditions.**

10  
11  
12  
13  
14  
15 **There are a number of strengths to this study.** The SLV-PSP is unique because it  
16 sought the combined views of patients, carers and eye health professionals to  
17 identify uncertainties about the prevention, diagnosis and treatment of sight loss and  
18 eye conditions and prioritise them for research to address<sup>5</sup>. It is rare that those with  
19 direct experience of conditions are able to influence the research agenda<sup>3,5,6</sup>. **The  
20 views of patients, carers and professionals were given equal merit. All submitted  
21 questions were evaluated independently and equally. Duplicate questions and out of  
22 scope questions were removed. We did not encounter particular misunderstandings  
23 between lay persons and professionals or insufficient knowledge of the public. Open  
24 discussions occurred during the face-to-face workshops with good communication  
25 and facilitation to encourage respectful listening in accordance with James Lind  
26 Alliance guidelines. Questions could only be pooled if this was agreed by patients,  
27 carers and professionals. Where there was no agreement, the questions remained  
28 separate. Thus, any differing perspectives of priorities between participants were  
29 acknowledged. We did not aim to compare and contrast questions from patients,  
30 carers and professionals but to represent and act on all.**

31  
32  
33  
34  
35  
36  
37  
38  
39  
40  
41  
42  
43 This SLV-PSP provided an extensive set of unanswered questions prioritised by  
44 patients, carers and eye health professionals across twelve categories of eye  
45 conditions. These questions addressed a broad range of eye conditions and  
46 considered issues of aetiology, prevention, screening, assessment and  
47 management. **Importantly, the public were as likely to propose questions in relation  
48 to aetiology, assessment and management just as professionals were as likely to  
49 raise questions regarding impact of sight loss.**

50  
51  
52  
53  
54  
55  
56 **In addition to the strengths of our study, we identified a number of limitations. We  
57 were unable to calculate a response rate for the survey because of the nature of its**  
58  
59  
60

1  
2  
3 design and implementation. We did not request the views of 'pure' researchers (i.e.  
4 scientists with no current clinical practice) as these individuals are intentionally  
5 excluded from the priority setting process by the James Lind Alliance. This step is a  
6 key feature of the James Lind Alliance methodology in which the remit is to provide  
7 an opportunity for patients, carers and clinicians to influence the research agenda.  
8 We acknowledge this is a different approach but do not consider their exclusion as a  
9 flaw in this process as we include clinical researchers who did take part alongside  
10 clinicians and the public.  
11

12  
13  
14  
15  
16  
17 These questions may now be used to encourage researchers to investigate what is  
18 most important to these groups. We do not know how our research questions  
19 compare to the prioritisation of research areas by scientists, government agencies or  
20 other organisation research funders. We are unaware of any systematic data  
21 collating such data.  
22

23  
24  
25 Various organisations in the sector have set out priorities for eye health and eye  
26 research in the past, for example Vision2020UK<sup>7</sup>. In addition, organisations  
27 representing the interests of patients/carers and eye health professionals took part in  
28 the process, both in promoting the survey and being directly involved in priority  
29 setting. Future work to review the SLV-PSP projects priorities with these  
30 organisations could be helpful in developing an understanding of how these new,  
31 patient and clinician led priorities can inform the sectors approach to commissioning  
32 research and focusing resources. Organisations in the sector are already working to  
33 review their organisational priorities with the SLV priorities, and have begun to invite  
34 researchers seeking funding to consider how their proposed research relates to the  
35 SLV priorities.  
36  
37

38  
39  
40  
41  
42  
43  
44 Similar to other PSP processes, we have provided information on our research  
45 priorities openly to national funding organisations and it is envisaged that research  
46 funders will be able to use the list to inform commissioned calls for research and  
47 identify which research applications to response mode funding opportunities can  
48 answer questions that these groups have agreed are a priority. Furthermore, any  
49 questions or uncertainties not prioritised in this process were submitted to and are  
50 currently available on the UK Database of Uncertainties about the Effects of  
51 Treatments (UK DUETs). Thus individuals looking for uncertainties for their research  
52  
53  
54  
55  
56  
57  
58  
59  
60

1  
2  
3 can access such information direct from UK DUETs. This sharing of information  
4 contributes to the quality assurance process of avoiding waste in research.  
5  
6

7 The SLV-PSP will also help to increase awareness of why research into sight loss  
8 and vision is necessary and important. It will be used to campaign for major funders  
9 to invest in sight loss and eye conditions, all of which are placing increased  
10 emphasis on researchers demonstrating how they have consulted and involved the  
11 public and patients in the process of developing their research.  
12  
13  
14

15  
16 These remain significant goals. For a sector with around 700 organisations to arrive  
17 at any kind of consensus for research priority areas, a process that was genuinely  
18 consultative, open and engaging to the individuals whose interests these  
19 organisations represent as well as at an organisational level was recognised as  
20 being critical. For a prioritisation exercise to be useful to the sector it needed to  
21 make sense to funders and statutory bodies with responsibilities and interests in  
22 these areas as well as to researchers. It was recognised that a prioritisation of  
23 research areas produced by a small group within the sector would not be credible  
24 and would never engage the support required for it to achieve the goals listed above.  
25  
26  
27  
28  
29  
30  
31  
32  
33  
34

### 35 **Conclusions**

36  
37 Following a systematic process of national consultation and widespread survey of  
38 patients, carers and clinicians, 2220 individuals generated 4461 questions. Through  
39 a process of data analysis, interim prioritisation and final workshops, a top ten or  
40 eleven research questions have been identified for twelve categories of eye  
41 conditions. This is the first time, to our knowledge, that an exercise like this has been  
42 carried out anywhere in the world for sight loss and vision. Not only is this the most  
43 wide ranging and ambitious James Lind Alliance priority setting partnership, it also  
44 engaged a diversity of participants and enabled them to reach consensus together.  
45 For the first time, we have a clear idea of what the consumers of eye research – the  
46 patients and the people who care for and treat them – believe research money  
47 should be spent on. It has provided a focus for research in sight loss and vision and  
48 it is intended that these priorities are used to inform funders, researchers, clinicians  
49 and the public.  
50  
51  
52  
53  
54  
55  
56  
57  
58  
59  
60

## Figure legends

Figure 1: Flowchart showing the steps of the process from Stage 1 when establishing the PSP through to Stage 5 at the final prioritisation.

Figure 2: Background of respondents showing that questions were largely received from people who have sight loss or an eye condition, but also including eye health professions, organisations, parents, family and carers.

## References

1. Access Economics (2009) Future Sight Loss UK 1: The economic impact of partial sight and blindness in the UK adult population, RNIB
2. <http://www.vision2020uk.org.uk/>
3. Chalmers, I. and Glasziou, P. (2009) 'Avoidable waste in the production and reporting of research evidence', *The Lancet*, Vol. 374, pp. 86–89.
4. Sight loss and vision priority setting partnership. Setting priorities for eye research. (2013) Final report. [www.sightlosspsp.org.uk](http://www.sightlosspsp.org.uk)
5. Stewart, R. and Oliver, S. (2008) *A systematic map of studies of patients' and clinicians' research priorities*. London: James Lind Alliance.
6. Caron-Flinterman J, et al. (2006) Patients priorities concerning health research: the case of asthma and COPD research in the Netherlands. *Health Expectations*, 8, pp253–263.
7. UK Vision Strategy 2013-2018. [www.vision2020uk.org.uk](http://www.vision2020uk.org.uk)



Table 1 Categories of eye condition

|                                         | Initial number of survey questions | Number of questions at interim prioritisation | Number of participants at interim prioritisation | Number of questions at final prioritisation |
|-----------------------------------------|------------------------------------|-----------------------------------------------|--------------------------------------------------|---------------------------------------------|
| <b>Age-related macular degeneration</b> | 763                                | 43                                            | 101 PPI<br>25 Professionals                      | 29                                          |
| <b>Cataract</b>                         | 191                                | 27                                            | Not required                                     | 27                                          |
| <b>Childhood-onset disorders</b>        | 125                                | 69                                            | 12 PPI<br>20 Professionals                       | 30                                          |
| <b>Corneal and external diseases</b>    | 292                                | 93                                            | 25 PPI<br>38 Professionals                       | 30                                          |
| <b>Glaucoma</b>                         | 1235                               | 78                                            | 182 PPI<br>25 Professionals                      | 30                                          |
| <b>Inherited retinal diseases</b>       | 280                                | 63                                            | 27 PPI<br>25 Professionals                       | 30                                          |
| <b>Neuro-ophthalmology</b>              | 125                                | 43                                            | 15 PPI<br>21 Professionals                       | 30                                          |
| <b>Ocular cancer</b>                    | 26                                 | 19                                            | Not required                                     | 19                                          |
| <b>Ocular inflammatory diseases</b>     | 472                                | 66                                            | 27 PPI<br>21 Professionals                       | 30                                          |

|                                             |     |    |                            |    |
|---------------------------------------------|-----|----|----------------------------|----|
| <b>Refractive error and ocular motility</b> | 188 | 70 | 21 PPI<br>23 Professionals | 31 |
| <b>Retinal vascular diseases</b>            | 205 | 56 | 15 PPI<br>12 Professionals | 30 |
| <b>Vitreoretinal and ocular trauma</b>      | 265 | 59 | 21 PPI<br>8 Professionals  | 30 |

PPI: Inclusive of patients, carers, relatives, organisation representatives.

Professionals: Inclusive of eye health professions.

**Table 2** Final workshop participants

| Category                             | Total number of workshop participants | Number of patients, relatives, carers, patient groups and organisations | Number of eye health professionals |
|--------------------------------------|---------------------------------------|-------------------------------------------------------------------------|------------------------------------|
| Age-related Macular Degeneration     | 17                                    | 9                                                                       | 8                                  |
| Cataract                             | 11                                    | 5                                                                       | 6                                  |
| Childhood-Onset Disorders            | 16                                    | 7                                                                       | 9                                  |
| Corneal and External Diseases        | 12                                    | 5                                                                       | 7                                  |
| Glaucoma                             | 17                                    | 9                                                                       | 8                                  |
| Inherited Retinal Diseases           | 19                                    | 11                                                                      | 8                                  |
| Neuro-ophthalmology                  | 10                                    | 6                                                                       | 4                                  |
| Ocular Cancer                        | 10                                    | 6                                                                       | 4                                  |
| Ocular Inflammatory Diseases         | 10                                    | 5                                                                       | 5                                  |
| Refractive Error and Ocular Motility | 12                                    | 5                                                                       | 7                                  |
| Retinal Vascular Diseases            | 11                                    | 3                                                                       | 8                                  |
| Vitreoretinal and Ocular Trauma      | 10                                    | 7                                                                       | 3                                  |
| <b>TOTAL</b>                         | <b>155</b>                            | <b>78</b>                                                               | <b>77</b>                          |

**Table 3** Top ten lists per category

|    | <b>Age-related macular degeneration</b>                                                                                            | <b>Cataract</b>                                                                                                                                | <b>Childhood-onset disorders</b>                                                                                                                              | <b>Corneal and external diseases</b>                                                                    | <b>Glaucoma</b>                                                                                           | <b>Inherited retinal diseases</b>                                                                                                                                           |
|----|------------------------------------------------------------------------------------------------------------------------------------|------------------------------------------------------------------------------------------------------------------------------------------------|---------------------------------------------------------------------------------------------------------------------------------------------------------------|---------------------------------------------------------------------------------------------------------|-----------------------------------------------------------------------------------------------------------|-----------------------------------------------------------------------------------------------------------------------------------------------------------------------------|
| 1  | Can a treatment to stop dry AMD progressing and/or developing into the wet form be devised?                                        | How can cataracts be prevented from developing?                                                                                                | How can cerebral visual impairment be identified, prevented and treated in children?                                                                          | Can new therapies such as gene or stem cell treatments be developed for corneal diseases?               | What are the most effective treatments for glaucoma and how can treatment be improved?                    | Can a treatment to slow down progression or reverse sight loss in inherited retinal diseases be developed?                                                                  |
| 2  | What is the cause of AMD?                                                                                                          | Can the return of cloudy or blurred vision after cataract surgery known as posterior capsule opacity (PCO) or secondary cataract be prevented? | How can treatment for visual pathway damage associated with pre-term birth be developed?                                                                      | What is the most effective management for dry eye and can new strategies be developed?                  | How can loss of vision be restored for people with glaucoma?                                              | How can sight loss be prevented in an individual with inherited retinal disease?                                                                                            |
| 3  | How can AMD be prevented?                                                                                                          | How can cataract progression be slowed down?                                                                                                   | How do we improve screening and surveillance from the ante-natal period through to childhood to ensure early diagnosis of impaired vision and eye conditions? | Can treatments to save eye sight from microbial keratitis be improved?                                  | How can glaucoma be stopped from progressing?                                                             | Is a genetic (molecular) diagnosis possible for all inherited retinal diseases?                                                                                             |
| 4  | Are there ways of restoring sight loss for people with AMD?                                                                        | What alternatives to treat cataracts other than cataract surgery are being developed?                                                          | Can the treatment of amblyopia be improved to produce better short and long term outcomes than are possible with current treatments?                          | How can the rejection of corneal transplants be prevented?                                              | What can be done to improve early diagnosis of sight-threatening glaucoma?                                | What factors affect the progression of sight loss in inherited retinal diseases?                                                                                            |
| 5  | Can the development of AMD be predicted?                                                                                           | What is the cause of cataract?                                                                                                                 | How can cataract be prevented in children?                                                                                                                    | Can the outcomes of corneal transplantation be improved?                                                | What causes glaucoma?                                                                                     | What causes sight loss in inherited retinal diseases?                                                                                                                       |
| 6  | What is the most effective way to detect and monitor the progression of early AMD?                                                 | How can cataract surgery outcomes be improved?                                                                                                 | What are the causes of coloboma and microphthalmia/anophthalmia and how can they be prevented?                                                                | What causes keratoconus to progress and can progression be prevented?                                   | What is the most effective way of monitoring the progression of glaucoma?                                 | What is the most effective way to support patients with inherited retinal disease?                                                                                          |
| 7  | What factors influence the progression of AMD?                                                                                     | How safe and effective is laser assisted cataract surgery?                                                                                     | Can vision be corrected in later life for people with amblyopia?                                                                                              | Can non-surgical therapy be developed for Fuchs' corneal dystrophy?                                     | How can glaucoma patients with a higher risk to progress rapidly be detected?                             | Can the diagnosis of inherited retinal diseases be refined so that individuals can be given a clearer idea about their specific condition and how it is likely to progress? |
| 8  | Can a non-invasive therapy be developed for wet AMD?                                                                               | Should accommodative lenses be developed for cataract surgery?                                                                                 | How can retinoblastoma be identified, prevented and treated in children?                                                                                      | Can corneal infections be prevented in high-risk individuals such as contact lens wearers?              | Why is glaucoma more aggressive in people of certain ethnic groups, such as those of West African origin? | What is the relationship between sight loss and mental health for people with inherited retinal diseases?                                                                   |
| 9  | Can dietary factors, nutritional supplements, complementary therapies or lifestyle changes prevent or slow the progression of AMD? | What is the best measure of visual disability due to cataract?                                                                                 | Can better treatments for glaucoma in children be developed?                                                                                                  | What is the cause of keratoconus and can it be prevented?                                               | How can glaucoma be prevented?                                                                            | Would having a treatment for an inherited retinal disease preclude a patient from having another treatment?                                                                 |
| 10 | What are the best enablement strategies for people with AMD?                                                                       | Can retinal detachment be prevented after cataract surgery?                                                                                    | Can a treatment be developed to improve vision for people with albinism?                                                                                      | What is the most effective management of ocular complications associated with Stevens Johnson Syndrome? | Is there a link between treatment adherence and glaucoma progression and how can adherence be improved?   | With regard to inherited retinal diseases what is the role of pre-natal and pre-implantation diagnosis in helping parents make informed choices?                            |
| 11 |                                                                                                                                    | What are the outcomes for cataract surgery among people with different levels of cognitive                                                     |                                                                                                                                                               | Can severe ocular surface disease in children, such as blepharokeratoconjunctivitis and                 |                                                                                                           |                                                                                                                                                                             |

|    | <b>Neuro-ophthalmology</b> | <b>Ocular cancer</b>                                                                                               | <b>Ocular inflammatory diseases</b>                                                        | <b>Refractive error and ocular motility</b>                                                                                                                                                       | <b>Retinal vascular diseases</b>                                                                                     | <b>Vitreoretinal and ocular trauma</b>                                                                    |
|----|----------------------------|--------------------------------------------------------------------------------------------------------------------|--------------------------------------------------------------------------------------------|---------------------------------------------------------------------------------------------------------------------------------------------------------------------------------------------------|----------------------------------------------------------------------------------------------------------------------|-----------------------------------------------------------------------------------------------------------|
| 1  |                            | impairment (all causes excluding dementia, stroke, neurological conditions, head injuries)?                        |                                                                                            | vernal keratoconjunctivitis be managed better?                                                                                                                                                    |                                                                                                                      |                                                                                                           |
| 2  |                            |                                                                                                                    |                                                                                            |                                                                                                                                                                                                   |                                                                                                                      |                                                                                                           |
| 3  |                            |                                                                                                                    |                                                                                            |                                                                                                                                                                                                   |                                                                                                                      |                                                                                                           |
| 4  |                            |                                                                                                                    |                                                                                            |                                                                                                                                                                                                   |                                                                                                                      |                                                                                                           |
| 5  |                            |                                                                                                                    |                                                                                            |                                                                                                                                                                                                   |                                                                                                                      |                                                                                                           |
| 6  |                            |                                                                                                                    |                                                                                            |                                                                                                                                                                                                   |                                                                                                                      |                                                                                                           |
| 7  |                            |                                                                                                                    |                                                                                            |                                                                                                                                                                                                   |                                                                                                                      |                                                                                                           |
| 8  | <b>1</b>                   | What can be done to help ocular cancer sufferers?                                                                  | What are the most effective treatments for ocular and orbital inflammatory diseases?       | What factors influence the development of refractive error (myopia, astigmatism, presbyopia and long-sightedness)?                                                                                | What are the best methods to prevent retinopathy of prematurity?                                                     | How can surgical techniques be improved to save sight for eyes damaged by injury?                         |
| 9  |                            |                                                                                                                    |                                                                                            |                                                                                                                                                                                                   |                                                                                                                      |                                                                                                           |
| 10 |                            |                                                                                                                    |                                                                                            |                                                                                                                                                                                                   |                                                                                                                      |                                                                                                           |
| 11 |                            |                                                                                                                    |                                                                                            |                                                                                                                                                                                                   |                                                                                                                      |                                                                                                           |
| 12 |                            |                                                                                                                    |                                                                                            |                                                                                                                                                                                                   |                                                                                                                      |                                                                                                           |
| 13 |                            |                                                                                                                    |                                                                                            |                                                                                                                                                                                                   |                                                                                                                      |                                                                                                           |
| 14 | <b>2</b>                   | Can gene-based targeted therapies for ocular cancers be developed?                                                 | What causes thyroid eye disease?                                                           | What is the cause of both congenital and acquired nystagmus?                                                                                                                                      | How can sight loss from diabetic retinal changes be prevented and reduced?                                           | How can the risk of losing sight for people with retinal detachment be reduced?                           |
| 15 |                            |                                                                                                                    |                                                                                            |                                                                                                                                                                                                   |                                                                                                                      |                                                                                                           |
| 16 |                            |                                                                                                                    |                                                                                            |                                                                                                                                                                                                   |                                                                                                                      |                                                                                                           |
| 17 |                            |                                                                                                                    |                                                                                            |                                                                                                                                                                                                   |                                                                                                                      |                                                                                                           |
| 18 |                            |                                                                                                                    |                                                                                            |                                                                                                                                                                                                   |                                                                                                                      |                                                                                                           |
| 19 | <b>3</b>                   | How can immunotherapy be used to fight metastatic ocular melanoma?                                                 | Can the severity of ocular and orbital inflammatory disease in an individual be predicted? | How can the development of binocular vision in young children with squint and amblyopia be promoted, and would the same approach work in older individuals without inducing intractable diplopia? | What are the predictive factors for the progression to sight threatening diabetic eye disease?                       | How can better interventions be developed that are effective in treating vitreous opacities/eye floaters? |
| 20 |                            |                                                                                                                    |                                                                                            |                                                                                                                                                                                                   |                                                                                                                      |                                                                                                           |
| 21 |                            |                                                                                                                    |                                                                                            |                                                                                                                                                                                                   |                                                                                                                      |                                                                                                           |
| 22 |                            |                                                                                                                    |                                                                                            |                                                                                                                                                                                                   |                                                                                                                      |                                                                                                           |
| 23 |                            |                                                                                                                    |                                                                                            |                                                                                                                                                                                                   |                                                                                                                      |                                                                                                           |
| 24 |                            |                                                                                                                    |                                                                                            |                                                                                                                                                                                                   |                                                                                                                      |                                                                                                           |
| 25 | <b>4</b>                   | What are the most effective detection and screening methods for follow up to detect metastasis of ocular melanoma? | Is it possible to prevent further occurrences of retinal damage caused by toxoplasmosis?   | Would correction of refractive error have a positive impact on early life learning and development?                                                                                               | Is there a way to improve screening of premature babies for retinopathy of prematurity?                              | What causes retinal detachment and can it be prevented?                                                   |
| 26 |                            |                                                                                                                    |                                                                                            |                                                                                                                                                                                                   |                                                                                                                      |                                                                                                           |
| 27 |                            |                                                                                                                    |                                                                                            |                                                                                                                                                                                                   |                                                                                                                      |                                                                                                           |
| 28 |                            |                                                                                                                    |                                                                                            |                                                                                                                                                                                                   |                                                                                                                      |                                                                                                           |
| 29 |                            |                                                                                                                    |                                                                                            |                                                                                                                                                                                                   |                                                                                                                      |                                                                                                           |
| 30 |                            |                                                                                                                    |                                                                                            |                                                                                                                                                                                                   |                                                                                                                      |                                                                                                           |
| 31 | <b>5</b>                   | How can follow-up for ocular complications be managed in patients with ocular melanoma?                            | What causes birdshot retinopathy?                                                          | Does early diagnosis of refractive error improve long-term prognosis and promote faster, more effective treatment?                                                                                | Can an effective long lasting treatment for diabetic macular oedema, both ischaemic and non-ischaemic, be developed? | Can more effective diagnostic tools be developed for assessing the vitreous and eye floaters?             |
| 32 |                            |                                                                                                                    |                                                                                            |                                                                                                                                                                                                   |                                                                                                                      |                                                                                                           |
| 33 |                            |                                                                                                                    |                                                                                            |                                                                                                                                                                                                   |                                                                                                                      |                                                                                                           |
| 34 |                            |                                                                                                                    |                                                                                            |                                                                                                                                                                                                   |                                                                                                                      |                                                                                                           |
| 35 | <b>6</b>                   | What is the best management of metastatic choroidal melanoma?                                                      | Why does disease burn out in patients with ocular and orbital inflammatory diseases?       | What is the effect of congenital nystagmus on visual and emotional development?                                                                                                                   | Can a retinal vein occlusion be predicted and prevented?                                                             | Can a functioning prosthetic eye be developed to replace an eye damaged by injury?                        |
| 36 |                            |                                                                                                                    |                                                                                            |                                                                                                                                                                                                   |                                                                                                                      |                                                                                                           |
| 37 |                            |                                                                                                                    |                                                                                            |                                                                                                                                                                                                   |                                                                                                                      |                                                                                                           |
| 38 | <b>7</b>                   | What activates choroidal melanoma metastasis in the liver after the primary melanoma has been treated?             | Can early detection methods be developed for ocular and orbital inflammatory diseases?     | What is the most effective treatment for exotropia and when should it be delivered?                                                                                                               | Can new non-invasive treatments be developed to slow down the progression of diabetic retinopathy?                   | How can epiretinal membrane/fibrosis be prevented or treated?                                             |
| 39 |                            |                                                                                                                    |                                                                                            |                                                                                                                                                                                                   |                                                                                                                      |                                                                                                           |
| 40 |                            |                                                                                                                    |                                                                                            |                                                                                                                                                                                                   |                                                                                                                      |                                                                                                           |
| 41 |                            |                                                                                                                    |                                                                                            |                                                                                                                                                                                                   |                                                                                                                      |                                                                                                           |
| 42 |                            |                                                                                                                    |                                                                                            |                                                                                                                                                                                                   |                                                                                                                      |                                                                                                           |
| 43 | <b>8</b>                   | Can adjuvant therapies be developed to treat ocular                                                                | What medications best prevent the development of eye disease in                            | How can the functional effects of surgical treatment for squint best                                                                                                                              | What are the barriers that prevent diabetic patients                                                                 | Can stem cells be used to regrow an eye or part of an eye?                                                |
| 44 |                            |                                                                                                                    |                                                                                            |                                                                                                                                                                                                   |                                                                                                                      |                                                                                                           |

1  
2  
3  
4  
5  
6  
7  
8  
9  
10  
11  
12  
13  
14  
15  
16  
17  
18  
19  
20  
21  
22  
23  
24  
25  
26  
27  
28  
29  
30  
31  
32  
33  
34  
35  
36  
37  
38  
39  
40  
41  
42  
43  
44  
45  
46  
47  
48  
49

|    |                                                                                                                 |                                                                     |                                                                |                                                                                                                                |                                                                                                       |                                                                          |
|----|-----------------------------------------------------------------------------------------------------------------|---------------------------------------------------------------------|----------------------------------------------------------------|--------------------------------------------------------------------------------------------------------------------------------|-------------------------------------------------------------------------------------------------------|--------------------------------------------------------------------------|
|    | motility manifestations following stroke?                                                                       | melanoma?                                                           | Behcets?                                                       | be assessed?                                                                                                                   | having regular eye checks?                                                                            |                                                                          |
| 9  | How can electronic devices improve or restore vision for people with optic neuropathies?                        | What are the causes of ocular cancer and how can they be prevented? | What causes scleritis?                                         | Could the accurate testing of refractive error be made less dependent on a subjective response i.e. the person's own response? | What rehabilitation programmes are best for the management of distorted vision from retinal diseases? | What causes posterior vitreous detachment/vitreous syneresis?            |
| 10 | Can an alternative or new treatment be developed that will treat the sight loss caused by giant cell arteritis? | What is the most effective treatment for primary ocular melanoma?   | Can diet or lifestyle changes prevent uveitis from developing? | How can myopia be prevented?                                                                                                   | What is the efficacy and safety of anti-VEGF agents in the treatment of retinopathy of prematurity?   | Are there methods to prevent and improve the treatment of macular holes? |

1  
2  
3  
4  
5  
6  
7  
8  
9  
10  
11  
12  
13  
14  
15  
16  
17  
18  
19  
20  
21  
22  
23  
24  
25  
26  
27  
28  
29  
30  
31  
32  
33  
34  
35  
36  
37  
38  
39  
40  
41  
42  
43  
44  
45  
46  
47  
48  
49  
50  
51  
52  
53  
54  
55  
56  
57  
58  
59  
60

**Figure 1 Flowchart of SLVPSP process**

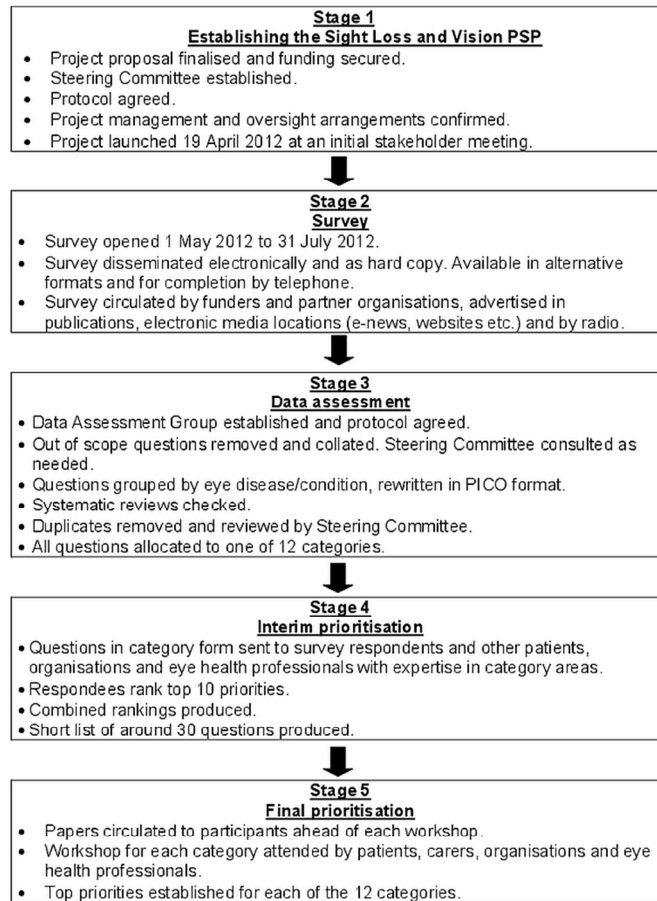

90x116mm (300 x 300 DPI)

1  
2  
3  
4  
5  
6  
7  
8  
9  
10  
11  
12  
13  
14  
15  
16  
17  
18  
19  
20  
21  
22  
23  
24  
25  
26  
27  
28  
29  
30  
31  
32  
33  
34  
35  
36  
37  
38  
39  
40  
41  
42  
43  
44  
45  
46  
47  
48  
49  
50  
51  
52  
53  
54  
55  
56  
57  
58  
59  
60



313x236mm (96 x 96 DPI)

Review only
